# Supplementary material for: Goal-oriented care for patients with chronic conditions or multimorbidity in primary care: A scoping review and concept analysis
Source: PubMed Central journal article supplement (PMC8815876; doi:10.1371/journal.pone.0262843), 2022-02-04
Supplement: pone.0262843.s004.pdf [file pone.0262843.s004.pdf]

|                                |                                                                                                                                                                                                                                                                                                                                                                                                                                                                                                                                                                                                                                                                                                                                                                                                                                                                                                                                                                                                                                                                                                                                                                                                                                                                                                                                                                                                                                                                                                                                                                                                                                                                                                                                                                                                                                                                                                                                                                                                                                                                                                                                 |
|--------------------------------|---------------------------------------------------------------------------------------------------------------------------------------------------------------------------------------------------------------------------------------------------------------------------------------------------------------------------------------------------------------------------------------------------------------------------------------------------------------------------------------------------------------------------------------------------------------------------------------------------------------------------------------------------------------------------------------------------------------------------------------------------------------------------------------------------------------------------------------------------------------------------------------------------------------------------------------------------------------------------------------------------------------------------------------------------------------------------------------------------------------------------------------------------------------------------------------------------------------------------------------------------------------------------------------------------------------------------------------------------------------------------------------------------------------------------------------------------------------------------------------------------------------------------------------------------------------------------------------------------------------------------------------------------------------------------------------------------------------------------------------------------------------------------------------------------------------------------------------------------------------------------------------------------------------------------------------------------------------------------------------------------------------------------------------------------------------------------------------------------------------------------------|
| <b>Manuscript Number:</b>      | PONE-D-20-30664                                                                                                                                                                                                                                                                                                                                                                                                                                                                                                                                                                                                                                                                                                                                                                                                                                                                                                                                                                                                                                                                                                                                                                                                                                                                                                                                                                                                                                                                                                                                                                                                                                                                                                                                                                                                                                                                                                                                                                                                                                                                                                                 |
| <b>Article Type:</b>           | Research Article                                                                                                                                                                                                                                                                                                                                                                                                                                                                                                                                                                                                                                                                                                                                                                                                                                                                                                                                                                                                                                                                                                                                                                                                                                                                                                                                                                                                                                                                                                                                                                                                                                                                                                                                                                                                                                                                                                                                                                                                                                                                                                                |
| <b>Full Title:</b>             | Goal-oriented care in primary care: a concept analysis                                                                                                                                                                                                                                                                                                                                                                                                                                                                                                                                                                                                                                                                                                                                                                                                                                                                                                                                                                                                                                                                                                                                                                                                                                                                                                                                                                                                                                                                                                                                                                                                                                                                                                                                                                                                                                                                                                                                                                                                                                                                          |
| <b>Short Title:</b>            | Goal-oriented care in primary care                                                                                                                                                                                                                                                                                                                                                                                                                                                                                                                                                                                                                                                                                                                                                                                                                                                                                                                                                                                                                                                                                                                                                                                                                                                                                                                                                                                                                                                                                                                                                                                                                                                                                                                                                                                                                                                                                                                                                                                                                                                                                              |
| <b>Corresponding Author:</b>   | Dagje Boeykens<br>Universiteit Gent Faculteit Geneeskunde en Gezondheidswetenschappen<br>Ghent, BELGIUM                                                                                                                                                                                                                                                                                                                                                                                                                                                                                                                                                                                                                                                                                                                                                                                                                                                                                                                                                                                                                                                                                                                                                                                                                                                                                                                                                                                                                                                                                                                                                                                                                                                                                                                                                                                                                                                                                                                                                                                                                         |
| <b>Keywords:</b>               | goal-oriented care, goal-setting, patient-centeredness, chronic conditions, multimorbidity, concept analysis                                                                                                                                                                                                                                                                                                                                                                                                                                                                                                                                                                                                                                                                                                                                                                                                                                                                                                                                                                                                                                                                                                                                                                                                                                                                                                                                                                                                                                                                                                                                                                                                                                                                                                                                                                                                                                                                                                                                                                                                                    |
| <b>Abstract:</b>               | <p><b>Background:</b><br/>The healthcare system is faced by an ageing population, increase in chronic conditions and multimorbidity. Multimorbid patients are faced with multiple parallel care processes leading to a risk for fragmented care. These problems relate to the disease-oriented paradigm. In this paradigm the treatment goals can be in contrast with what patients value.</p> <p>The concept of goal-oriented care is proposed as an alternative way of providing care. There is a need to translate this concept into tangible knowledge so providers can better understand and use the concept in clinical practice. The aim of this study is to address this need by means of a concept analysis.</p> <p><b>Method:</b></p> <p>This concept analysis using the method of Walker and Avant is based on a literature search in PubMed, Embase, Cochrane Library, PsychInfo, CINAHL, OTSeeker and Web of Science. The method provides eight iterative steps: select a concept, determine purpose, determine defining attributes, identify model case, identify additional case, identify antecedents and consequences and define empirical referents.</p> <p><b>Results:</b></p> <p>The analysis of 37 articles revealed that goal-oriented care is a dynamic and iterative process of three stages: goal-elicitation, goal-setting and goal-evaluation. The process is underpinned by the patient's context and values. Provider and patient preparedness are required to provide goal-oriented care. Goal-oriented care has the potential to improve patients' experiences and providers' well-being, to reduce costs and improve the overall population health. The challenge is to identify empirical referents to evaluate the process of goal-oriented care.</p> <p><b>Conclusion:</b></p> <p>A common understanding of goal-oriented care is presented. Further research should focus on how and what goals are set by the patient, how this knowledge could be translated into a tangible workflow and should support the development of a strategy to evaluate the goal-oriented process of care.</p> |
| <b>Order of Authors:</b>       | <p>Dagje Boeykens</p> <p>Pauline Boeckxstaens</p> <p>An De Sutter</p> <p>Lies Lahousse</p> <p>Peter Pype</p> <p>Patricia De Vriendt</p> <p>Dominique Van de Velde</p>                                                                                                                                                                                                                                                                                                                                                                                                                                                                                                                                                                                                                                                                                                                                                                                                                                                                                                                                                                                                                                                                                                                                                                                                                                                                                                                                                                                                                                                                                                                                                                                                                                                                                                                                                                                                                                                                                                                                                           |
| <b>Additional Information:</b> |                                                                                                                                                                                                                                                                                                                                                                                                                                                                                                                                                                                                                                                                                                                                                                                                                                                                                                                                                                                                                                                                                                                                                                                                                                                                                                                                                                                                                                                                                                                                                                                                                                                                                                                                                                                                                                                                                                                                                                                                                                                                                                                                 |

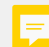

| Question                                                                                                                                                                                                                                                                                                                                                                                                                                                                                                                                                                                                                                                                                                                                                                                                                                                                                                                                                                                                                                                                                                                                                                                                                                                                                                                                                                            | Response                                                                                                                                                                                                                                                                                                                               |
|-------------------------------------------------------------------------------------------------------------------------------------------------------------------------------------------------------------------------------------------------------------------------------------------------------------------------------------------------------------------------------------------------------------------------------------------------------------------------------------------------------------------------------------------------------------------------------------------------------------------------------------------------------------------------------------------------------------------------------------------------------------------------------------------------------------------------------------------------------------------------------------------------------------------------------------------------------------------------------------------------------------------------------------------------------------------------------------------------------------------------------------------------------------------------------------------------------------------------------------------------------------------------------------------------------------------------------------------------------------------------------------|----------------------------------------------------------------------------------------------------------------------------------------------------------------------------------------------------------------------------------------------------------------------------------------------------------------------------------------|
| <p><b>Financial Disclosure</b></p> <p>Enter a financial disclosure statement that describes the sources of funding for the work included in this submission. Review the <a href="#">submission guidelines</a> for detailed requirements. View published research articles from <a href="#">PLOS ONE</a> for specific examples.</p> <p>This statement is required for submission and <b>will appear in the published article</b> if the submission is accepted. Please make sure it is accurate.</p> <p><b>Unfunded studies</b><br/>Enter: <i>The author(s) received no specific funding for this work.</i></p> <p><b>Funded studies</b><br/>Enter a statement with the following details:</p> <ul style="list-style-type: none"> <li>• Initials of the authors who received each award</li> <li>• Grant numbers awarded to each author</li> <li>• The full name of each funder</li> <li>• URL of each funder website</li> <li>• Did the sponsors or funders play any role in the study design, data collection and analysis, decision to publish, or preparation of the manuscript?</li> <li>• <b>NO</b> - Include this sentence at the end of your statement: <i>The funders had no role in study design, data collection and analysis, decision to publish, or preparation of the manuscript.</i></li> <li>• <b>YES</b> - Specify the role(s) played.</li> </ul> <p>* typeset</p> | <p>D.B. is a PhD student payed by the King Baudouin Foundation. Grant number: 2019-J5170820-211588 - King Baudouin Foundation - <a href="https://www.kbs-frb.be/nl/">https://www.kbs-frb.be/nl/</a> - The funders had no role in study design, data collection and analysis, decision to publish, or preparation of the manuscript</p> |
| <p><b>Competing Interests</b></p> <p>Use the instructions below to enter a competing interest statement for this submission. On behalf of all authors, disclose any <a href="#">competing interests</a> that could be perceived to bias this work—acknowledging all financial support and any other relevant financial or non-financial competing interests.</p> <p>This statement <b>will appear in the published article</b> if the submission is</p>                                                                                                                                                                                                                                                                                                                                                                                                                                                                                                                                                                                                                                                                                                                                                                                                                                                                                                                             | <p>The authors have declared that no competing interests exist.</p>                                                                                                                                                                                                                                                                    |

accepted. Please make sure it is accurate. View published research articles from [PLOS ONE](#) for specific examples.

**NO authors have competing interests**

Enter: *The authors have declared that no competing interests exist.*

**Authors with competing interests**

Enter competing interest details beginning with this statement:

*I have read the journal's policy and the authors of this manuscript have the following competing interests: [insert competing interests here]*

\* typeset

**Ethics Statement**

N/A

Enter an ethics statement for this submission. This statement is required if the study involved:

- Human participants
- Human specimens or tissue
- Vertebrate animals or cephalopods
- Vertebrate embryos or tissues
- Field research

Write "N/A" if the submission does not require an ethics statement.

General guidance is provided below. Consult the [submission guidelines](#) for detailed instructions. **Make sure that all information entered here is included in the Methods section of the manuscript.**

**Format for specific study types**

**Human Subject Research (involving human participants and/or tissue)**

- Give the name of the institutional review board or ethics committee that approved the study
- Include the approval number and/or a statement indicating approval of this research
- Indicate the form of consent obtained (written/oral) or the reason that consent was not obtained (e.g. the data were analyzed anonymously)

**Animal Research (involving vertebrate animals, embryos or tissues)**

- Provide the name of the Institutional Animal Care and Use Committee (IACUC) or other relevant ethics board that reviewed the study protocol, and indicate whether they approved this research or granted a formal waiver of ethical approval
- Include an approval number if one was obtained
- If the study involved *non-human primates*, add *additional details* about animal welfare and steps taken to ameliorate suffering
- If anesthesia, euthanasia, or any kind of animal sacrifice is part of the study, include briefly which substances and/or methods were applied

**Field Research**

Include the following details if this study involves the collection of plant, animal, or other materials from a natural setting:

- Field permit number
- Name of the institution or relevant body that granted permission

**Data Availability**

Authors are required to make all data underlying the findings described fully available, without restriction, and from the time of publication. PLOS allows rare exceptions to address legal and ethical concerns. See the [PLOS Data Policy](#) and [FAQ](#) for detailed information.

Yes - all data are fully available without restriction

A Data Availability Statement describing where the data can be found is required at submission. Your answers to this question constitute the Data Availability Statement and **will be published in the article**, if accepted.

**Important:** Stating 'data available on request from the author' is not sufficient. If your data are only available upon request, select 'No' for the first question and explain your exceptional situation in the text box.

Do the authors confirm that all data underlying the findings described in their manuscript are fully available without restriction?

**Describe where the data may be found in full sentences. If you are copying our sample text, replace any instances of XXX with the appropriate details.**

- If the data are **held or will be held in a public repository**, include URLs, accession numbers or DOIs. If this information will only be available after acceptance, indicate this by ticking the box below. For example: *All XXX files are available from the XXX database (accession number(s) XXX, XXX).*
- If the data are all contained **within the manuscript and/or Supporting Information files**, enter the following: *All relevant data are within the manuscript and its Supporting Information files.*
- If neither of these applies but you are able to provide **details of access elsewhere**, with or without limitations, please do so. For example:

*Data cannot be shared publicly because of [XXX]. Data are available from the XXX Institutional Data Access / Ethics Committee (contact via XXX) for researchers who meet the criteria for access to confidential data.*

*The data underlying the results presented in the study are available from (include the name of the third party*

All relevant data are within the manuscript and its Supporting Information Files

*and contact information or URL).*

- This text is appropriate if the data are owned by a third party and authors do not have permission to share the data.

\* typeset

Additional data availability information:

1           Goal-oriented care in primary care: a  
2           concept analysis.  
3

4   Dagje Boeykens <sup>ab\*</sup>, Pauline Boeckxstaens <sup>b\*</sup>, An De Sutter <sup>b</sup>, Lies Lahousse <sup>c</sup>, Peter Pype <sup>bd</sup>, Patricia De  
5   Vriendt <sup>aef&</sup>, Dominique Van de Velde<sup>ae&</sup>, on behalf of the Primary Care Academy<sup>^</sup>.

6           a. Department of Rehabilitation Sciences, Faculty of Medicine and Health Sciences. Ghent  
7           University. Ghent. Belgium.

8           b. Department of Public Health and Primary Care, Faculty of Medicine and Health Sciences.  
9           Ghent University. Ghent. Belgium.

10          c. Department of Bioanalysis, Faculty of Pharmaceutical Sciences, Ghent University. Ghent.  
11          Belgium.

12          d. End-of-Life Care Research Group, Faculty of Medicine and Health Sciences. VUB and Ghent  
13          University. Ghent. Belgium.

14          e. Department of Occupational Therapy. Artevelde University College. Ghent, Belgium.

15          f. Department of Gerontology and Frailty in Ageing Research Group, Faculty of Medicine and  
16          Pharmacy. Vrije Universiteit Brussel. Brussels. Belgium.

17   \* Corresponding author:

18   E-mail: [Dagje.boeykens@ugent.be](mailto:Dagje.boeykens@ugent.be)

19   \*: These authors contributed equally to this work.

20   &: These authors also contributed equally to this work.

21   ^Membership of the Primary Care Academy is provided in the Acknowledgments.

22

## 23 **Abstract**

### 24 **Background**

25 The healthcare system is faced by an ageing population, increase in chronic conditions and  
26 multimorbidity. Multimorbid patients are faced with multiple parallel care processes leading to a risk  
27  fragmented care. These problems relate to the disease-oriented paradigm. In this paradigm the  
28 treatment goals can be in contrast with what patients value.

29 The concept of goal-oriented care is proposed as an alternative way of providing care. There is a need  
30 to translate this concept into tangible knowledge so providers can better understand and use the  
31 concept in clinical practice. The aim of this study is to address this need by means of a concept analysis.

### 32 **Method**

33 This concept analysis using the method of Walker and Avant is based on a literature search in PubMed,  
34 Embase, Cochrane Library, PsychInfo, CINAHL, OTSeeker and Web of Science. The method provides  
35 eight iterative steps: select a concept, determine purpose, determine defining attributes, identify  
36 model case, identify additional case, identify antecedents and consequences and define empirical  
37 referents.

### 38 **Results**

39 The analysis of 37 articles revealed that goal-oriented care is a dynamic and iterative process of three  
40 stages: goal-elicitation, goal-setting and goal-evaluation. The process is underpinned by the patient's  
41 context and values. Provider and patient preparedness are required to provide goal-oriented care.  
42 Goal-oriented care has the potential to improve patients' experiences and providers' well-being, to  
43 reduce costs and improve the overall population health. The challenge is to identify empirical referents  
44  to evaluate the process of goal-oriented care.

45



46 **Conclusion**

47 A common understanding of goal-oriented care is presented. Further research should focus on how  
48 and what goals are set by the patient, how this knowledge could be translated into a tangible workflow  
49 and should support the development of a strategy to evaluate the goal-oriented process of care.

50 **Keywords**

51 goal-oriented care, goal-setting, patient-centeredness, chronic conditions, multimorbidity, concept  
52 analysis

53

54

55

56

57

58

59

60

61

62

63

64

65

66

## 67 Introduction

68 The healthcare system is faced by an ageing population and an increase in chronic conditions and  
69 multimorbidity (1). More and more people are forced to live with the consequences of these  
70 demographic changes and require ongoing (chronic) care on top of acute care (2). At the same time,  
71 patient autonomy is gaining importance and patients are considered as an active and important  
72 partner in their care (3, 4). Patients with chronic conditions are often consulting multiple health care  
73 providers (3) leading to a higher rate of encounters. They also receive a larger amount of prescriptions  
74 (5) and they are asked to complete a diverse set of self-monitoring tasks such as managing,  
75 exacerbations or monitoring biomedical targets (3). Since patients with (multiple) chronic conditions  
76 are faced with multiple parallel care process for their different conditions, there is a considerable risk  
77 for fragmented care. Especially when health care providers focus on disease control, patients can  
78 experience lack of care continuity and issues with communication as patients themselves focus on the  
79 meaning of care and more on personal wellbeing (6, 7). As a result, treatment goals can be in contrast  
80 with what patients value in their personal lives (3).

81 The health care system is oriented towards a disease-oriented paradigm to which many of these  
82 problems relate (8-10). In this paradigm, care is mainly organized according to disease-oriented  
83 guidelines (10). This may work well for patients with a single disease, but becomes inappropriate for  
84 patients with multiple problems. A possible way to overcome many of the challenges is to shift care  
85 back from 'what's the matter with the patient' to 'what matters to the patient'. It creates health care  
86 processes in which patients' needs are actively sought and met (9). One of the possible strategies is  
87 to actively engage patients in identifying their personal goals and aligning care to those goals (11). In  
88 1991, Mold proposed the concept of goal-oriented care as an alternative way for providing care (12).  
89 It has been suggested to contribute to patients' wellbeing and quality of life (13). Goal-oriented care  
90 as a new paradigm of care has the potential to overcome some of the new challenges for chronic  
91 patients (9).

92 Primary care is often the linchpin of care for these patients (14). It is easy accessible care in which  
93 providers address a large majority of health and social needs and develop sustained partnerships with  
94 patients in their community (15). Primary care offers a first contact point for new health needs,  
95 provides care continuity and care coordination in ongoing and complex cases (16).

96 Although many primary care providers assume they practice goal-oriented care spontaneously, there  
97 is a lack of underpinning knowledge and guidance on how to provide goal-oriented care to patients  
98 (13, 17). There is an urgent need to translate the paradigm of goal-oriented care into tangible  
99 knowledge so providers can better understand and use this concept in clinical practice. The knowledge  
100 gap on goal-oriented care is not only characterized by a lack of in-depth knowledge of the concept.  
101 There are also related concepts (such as shared-decision making (18) and patient-centered care (19))  
102 that challenge the common understanding of goal-oriented care.

103 The aim of this study is to address these knowledge gaps by means of a concept analysis to clarify the  
104 existing ambiguity and make an overview of the already existing knowledge. Clarity on the concept of  
105 goal-oriented care will enhance the understanding and will (potentially) facilitate the implementation  
106 of goal-oriented care interventions.

## 107 **Method**

108 This concept analysis aims to present an overview and synthetization of the existing literature  
109 regarding goal-oriented care for chronic ill patients in primary care. This will be performed by  
110 analyzing the concept into antecedents, attributes and consequences following the method of Walker  
111 and Avant (20). This method provides a framework of eight iterative steps: 1. select a concept, 2.  
112 determine the aims or purposes of analysis, 3. identify all concept definitions and select the literature,  
113 4. determine different attributes, 5. identify a model case, 6. identify an additional case, 7. identify  
114 antecedents and consequences, and 8. define empirical referents (20). In this concept analysis the

115 attributes are the heart and will present the characteristics of goal-oriented care and allow the  
116 broadest insight into the concept (20).

### 117 **Step 1: select a concept**

118 Goal-oriented care has been defined as an underpinning strategy for primary care reform in Flanders,  
119 Belgium. The concept is presented as one of the main topics of 'The Primary Care Academy' (PCA). The  
120 PCA is a consortium consisting of four universities (Ghent University, University of Antwerp, Catholic  
121 university of Leuven, Vrije Universiteit of Brussels), six universities of applied sciences (UAC VIVES, UAC  
122 Artevelde, UAC Ghent, UAC Leuven-Limburg, UAC Karel de Grote, UAC Thomas More) and important  
123 stakeholders (Flemish Patient Platform and White-Yellow Cross; a home care organization) in Belgium  
124 with the aim to strengthen the primary care organization and delivery. The PCA includes experts in  
125 primary care from a variety of healthcare and welfare disciplines. Discussions in the research group  
126 working on goal-oriented care created a necessity to clarify the concept.

### 127 **Step 2: determine the aims and purposes of the analysis**

128 The aim of this concept analysis is to build a common understanding to eliminate ambiguity between  
129 the concepts related to goal-oriented care. Specifically, the scope of the concept analysis is to define  
130 goal-oriented care for people with chronic conditions at the level of primary care.

### 131 **Step 3: select the literature**

132 A preliminary combination of search terms was identified: 'goal-oriented care', 'chronic care' and  
133 'primary care'. Based on these keywords a first search was performed to identify adjacent terms in the  
134 literature. The search strategy was revised in consultation with the librarian of the university and the  
135 senior researchers. The definitive keywords were: 'goal-oriented care', 'goal-oriented medical care',  
136 'person-centered goal-setting', 'patient-centered goal-setting', 'goal-oriented patient care' and  
137 'patient priorities', emphasized goal-oriented care and its synonyms. In a first phase, the keywords were

138 entered in PubMed, Embase and Cochrane Library (table 1). In a second phase, CINAHL, OTSeeker,  
139 PsycINFO and Web of Science were consulted and confirmed the first results.

|     |                                                                                                          |
|-----|----------------------------------------------------------------------------------------------------------|
| 140 | <b>PubMed</b>                                                                                            |
| 141 | (goal-directed care[MeSH Terms]) OR goal-oriented care [Title/abstract]) OR goal-oriented                |
| 142 | medical care [Title/abstract]) OR person-centered goal-setting [Title/abstract]) OR patient              |
| 143 | centered goal-setting [Title/abstract]) OR goal-oriented patient care[Title/abstract]) OR patient        |
| 144 | priorities [Title/abstract])                                                                             |
| 144 | <b>Embase</b>                                                                                            |
| 145 | <b>'goal-oriented care':ab,ti OR 'goal-oriented medical care':ab,ti OR 'person-centered goal-</b>        |
| 146 | <b>setting':ab,ti OR 'patient centered goal-setting':ab,ti OR 'goal-oriented patient care': ab,ti OR</b> |
| 147 | <b>'patient priorities':ab,ti</b>                                                                        |

148 *Table 1 Overview of the search strings*

149 Articles resulting from this search were put in Rayyan (21) to administer the data. A first selection  
150 based on title and abstract was performed with regard to the predefined in- and exclusion criteria.  
151 Inclusion criteria: (a) goal-oriented care as a health-related concept, (b) mentioning goal-setting, goal-  
152 oriented care or related concept (e.g. person-centered integrated care) and (c) focusing on patients  
153 with a chronic condition or multimorbidity. Exclusion criteria: (a) focusing on single-disease  
154 management (b) goals regarding disease-specific outcomes (e.g. cancer or diabetes) and (c) focusing  
155 on goal-oriented care in a specific context (e.g. rehabilitation center). Articles resulting from this first  
156 search were subjected to a full text screening based on the initial criteria and: (a) full text available, (b)  
157 written in English, (c) referring to goal-oriented care or related concepts as a concept and (d)  
158 containing information of a theoretical building of a definition.

159

160

## 161 **Step 4: defining the attributes**

162 The determination of the attributes started with a discussion of four key articles (1, 6, 22, 23) selected  
163 by the first author based on the divers approaches of goal-oriented care. These key articles were  
164 analyzed, deconstructed into codes and discussed with the entire research group resulting in a first  
165 overview of attributes of goal-oriented care. In a second phase, new articles were added and analyzed  
166 until all relevant literature was included. The different codes were put into NVIVO12 to synthesize the  
167 data and to initiate further discussion with the research group. This resulted in the final attributes  
168 (table 3). The method starting from reading the first article to defining the attributes is characterized  
169 by an iterative process in which the attributes were reformulated until consensus was reached.

## 170 **STEP 5: IDENTIFY A MODEL CASES, A CONTRARY CASE AND A BORDERLINE CASE**

171 A model case is presented as a narrative of how goal-oriented care could be conceptualized and  
172 illustrates all defined attributes of goal-oriented care (20). A contrary and borderline case differ from  
173 this model case and do not include all of the attributes and/or differ in one of them.

## 174 **Step 6: identify antecedents and consequences**

175 Antecedents are events or incidents that precede the process of applying goal-oriented care.  
176 Consequences are those events or incidents as a result of applying goal-oriented care (20).  
177 The antecedents and consequences were searched simultaneously with the attributes (step 4). Results  
178 have been discussed by the entire research group until consensus was reached.

## 179 **Step 7: define empirical referents**

180 Empirical referents provide an overview of the identified assessment tools related to the attributes  
181 aiming to make the concept, goal-oriented care, measurable. These assessment tools may be seen as

182 the underpinning needs and characteristics when developing an evaluation method of goal-oriented  
183 care.

## 184 **Results**

### 185 **Step 1-3**

186 A first search based on the predefined terms (Table 1) resulted in 590 articles; 82 from Cochrane  
187 Library, 188 from Embase and 313 from PubMed. After removing the duplicates, 366 articles were  
188 screened by title and abstract yielding 68 articles. A full text screening of these 68 articles lead to 15  
189 articles that fitted the predefined in- and exclusion criteria (step 3). Based on the snowballing method  
190 of adding new articles based on references, citations and similar articles 22 additional articles were  
191 added. This resulted in a total of 37 articles (Figure 1) (Table 2) that were selected for the full text  
192 analysis.

193 **Figure 1: Flow chart demonstrating the search string**

194

195

196

197

198

199

200

201

202

Table 2 Overview of the selected articles

| Papers identified based on full text screening |      |                                                                              |                                                                                                                                                                                                                                      |                                     |                                       |
|------------------------------------------------|------|------------------------------------------------------------------------------|--------------------------------------------------------------------------------------------------------------------------------------------------------------------------------------------------------------------------------------|-------------------------------------|---------------------------------------|
| No.                                            | Year | Authors                                                                      | Title                                                                                                                                                                                                                                | Study design                        | Journal                               |
| 1                                              | 1991 | Mold, Blake, Lorne, Becker (12)                                              | Goal-oriented medical care.                                                                                                                                                                                                          |                                     | Family Medicine                       |
| 2                                              | 2011 | De Maeseneer, Boeckxstaens (24)                                              | Care for non-communicable diseases (NCD's): time for a paradigm-shift.                                                                                                                                                               |                                     | World Hospital and health services.   |
| 3                                              | 2012 | Reuben, Tinetti (10)                                                         | Goal-oriented patient care- an alternative health outcomes paradigm.                                                                                                                                                                 | Perspective                         | The New England journal of Medicine   |
| 4                                              | 2014 | Bayliss, Bonds, Boyd, Davis, Finke, Fox, Stange (25)                         | Understanding the context of health for persons with multiple chronic conditions: moving from what is the matter to what matters.                                                                                                    |                                     | Annals of Family Medicine             |
| 5                                              | 2014 | Kramer, Bauer, Dicker, Durusu-Tranriover, Ferreira, Rigby, van Hulsteijn (8) | The changing face of internal medicine: patient- centered care.                                                                                                                                                                      | Position paper                      | European Journal of Internal Medicine |
| 6                                              | 2015 | Bernsten, Gammon, Steinsbekk, Salamonsen, Foss, Ruland, Fonnebo (26)         | How do we deal with multiple goals for care within an individual patient trajectory? A document content analysis of health service research papers on goals for care.                                                                | Document content analysis           | BMJ Open                              |
| 7                                              | 2016 | Blom, Elzen, Houwelingen, Heijmans, Stijnen, Van Den Hout, Gussekloo (27)    | Effectiveness and cost-effectiveness of a proactive, goal-oriented, integrated care model in general practice for older people. A cluster randomised controlled trial: integrated systematic care for older people-the ISCOPE study. | Cluster randomised controlled trial | Age and ageing                        |



|    |      |                                                                           |                                                                                                                                                                      |                                           |                                            |
|----|------|---------------------------------------------------------------------------|----------------------------------------------------------------------------------------------------------------------------------------------------------------------|-------------------------------------------|--------------------------------------------|
| 8  | 2016 | Boeckstaens, Willems, Lanssens, Decuyper, Brusselle, Kühlein, Sutter (28) | A qualitative interpretation of challenges associated with helping patients with multiple chronic diseases identify their goals.                                     | Qualitative research                      | Journal of comorbidity                     |
| 9  | 2016 | Mangin, Stephen, Bismah, Risdon (29)                                      | Making patient values visible in healthcare: a systematic review of tools to assess patient treatment priorities and preferences in the context of multimorbidity.   | Systematic review                         | BMJ Open                                   |
| 10 | 2016 | Schmidt, Babac, Pauer, Damm, von der Schulenberg (30)                     | Measuring patients priorities using the Analytic hierarchy process in comparison with best-worst scaling and rating cards: methodological aspects and ranking tasks. |                                           | Health economics review                    |
| 11 | 2016 | Tinetti, Esterson, Ferris, Posner, Blaum (1)                              | Patient priority decision making and care for older adults with multiple chronic conditions.                                                                         |                                           | Clinical geriatric medicine                |
| 12 | 2018 | Bernsten, Hoyem, Lettrem, Rul, Rumpsfeld, Gammon (6)                      | A person-centered integrated care quality framework, based on qualitative study of patient's evaluation of care in light of chronic care ideals.                     | Qualitative evaluative review             | BMC Health Services Research               |
| 13 | 2019 | Feder, Kiwak, Costello, Dindo, Hern, Bigos, Naik (3)                      | Perspective of patients in identifying their values-based health priorities.                                                                                         | Qualitative study                         | Journal of the American Geriatrics Society |
| 14 | 2019 | Franklin, Lewis, Willis, Roger, Venville, Smith (31)                      | Controlled, constrained or flexible? How self-management goals are shaped by patient-provider interactions.                                                          | Conversation analysis                     | Qualitative health research                |
| 15 | 2019 | Tinetti, Dindo, Smith, Blaum, Costello, Ouellet, Naik (32)                | Challenges and strategies in patient's health priorities-aligned decision-making for older adults with multiple chronic conditions.                                  | Participant observation qualitative study | PLOS One                                   |

| Papers identified through snowballing |      |                                                                                   |                                                                                                                                                                                                                                                  |                                               |                                      |
|---------------------------------------|------|-----------------------------------------------------------------------------------|--------------------------------------------------------------------------------------------------------------------------------------------------------------------------------------------------------------------------------------------------|-----------------------------------------------|--------------------------------------|
| No.                                   | Year | Authors                                                                           | Title                                                                                                                                                                                                                                            | Study design                                  | Journal                              |
| 16                                    | 2006 | Hurn, Kneebone, Cropley (33)                                                      | Goal setting as an outcome measure: a systematic review                                                                                                                                                                                          | Systematic review                             | Clinical Rehabilitation              |
| 17                                    | 2009 | Bodenheimer, Handley (34)                                                         | Goal-setting for behavior change in primary care: an exploration and status report.                                                                                                                                                              | Status report                                 | Patient education and counseling     |
| 18                                    | 2011 | Junius-Walker, Stolberg, Steinke, Theile, Hummers-Pradier, Dierks (35)            | Health and treatment priorities of older patients and their general practitioners: a cross-sectional study.                                                                                                                                      | Qualitative study                             | BMC Geriatrics                       |
| 19                                    | 2012 | Rijken, Bekkema, Boeckxstaens, Schellevis, De Maeseneer, Groenewegen (2)          | Chronic disease management programs: an adequate response to patients' needs?                                                                                                                                                                    |                                               | Health Expectations                  |
| 20                                    | 2014 | Lenzen, Daniëls, van Bokhoven, der Weijden, Beurskens (36)                        | Setting goals in chronic care: shared decision making as self-management support by the family physician.                                                                                                                                        | Background paper                              | European Journal of General Practice |
| 21                                    | 2017 | Kangovi, Mitra, Smith, Kulkarni, Turr, Huo, Glanz, Grande, Long (37)              | Decision-making and goal-setting in chronic disease management: baseline findings of a randomized controlled trial.                                                                                                                              | Randomized controlled trial                   | Patient education and counseling     |
| 22                                    | 2017 | Mold (38)                                                                         | Goal-directed health care: redefining health and health care in the era of value-based care.                                                                                                                                                     |                                               | Cureus                               |
| 23                                    | 2017 | Steel Gray, Wodchis, Upshur, Cott, McKinstry, Mercer, Palen, Ramsay, Thavorn (39) | Supporting goal-oriented primary health care for seniors with complex care needs using mobile technology: evaluation and implementation of the health system performance research network, Bridgepoint electronic patient reported outcome tool. | Pragmatic cluster randomized controlled trial | JMIR Research Protocols              |

|    |      |                                                                                              |                                                                                                                                                       |                                               |                                              |
|----|------|----------------------------------------------------------------------------------------------|-------------------------------------------------------------------------------------------------------------------------------------------------------|-----------------------------------------------|----------------------------------------------|
| 24 | 2017 | Schellinger, Anderson, Frazer, Cain (40)                                                     | Patient self-defined goals: essentials of person-centered care for serious illness.                                                                   | Descriptive qualitative analysis              | American Journal of Hospice                  |
| 25 | 2017 | Vermunt, Harmsen, Elwyn, Westert, Burgers, Rikkert, Faber (41)                               | A three-goal model for patients with multimorbidity: a qualitative approach.                                                                          | Qualitative study                             | Health Expectations                          |
| 26 | 2017 | Vermunt, Harmsen, Westert, Rikkert, Faber (13)                                               | Collaborative goal setting with elderly patients with chronic disease or multimorbidity: a systematic review.                                         | Systematic review                             | BMC Geriatrics                               |
| 27 | 2018 | Kessler, Walker, Sauv -Schenk, Egan (23)                                                     | Goal setting dynamics that facilitate or impede a client-centered approach.                                                                           | Conversational analysis                       | Scandinavian Journal of Occupational Therapy |
| 28 | 2018 | Naik, Dindo, Van Liew, Hundt, Vo, Hernandez-Bigos, Esterson, Geda, Rosen, Blaum, Tinetti (4) | Development of a clinically feasible process for identifying individual health priorities.                                                            | Prospective development and feasibility study | Journal of the American Geriatrics Society   |
| 29 | 2019 | De Groot, Sch nrock-Adema, Zwart, Damoiseaux, Jaarsma, Mol, Bombeke (42)                     | Learning from patients about patient-centredness: a realist review: BEME guide No.60                                                                  | Realist review                                | Medical Teacher                              |
| 30 | 2019 | Kuluski, Guilcher (43)                                                                       | Towards a person-centred learning health system: understanding value from the perspectives of patients and caregivers.                                |                                               | Healthcare papers                            |
| 31 | 2019 | Kuluski, Peckham, Gill, Gagnon, Wong-Cornall, McKillop, Parsons, Sheridan (9)                | What is important to older people with multimorbidity and their caregivers? Identifying attributes of person centered care from the user perspective. | Qualitative descriptive study                 | International Journal of Integrated Care     |

|    |      |                                                                                                               |                                                                                                                                                                        |                              |                                                  |
|----|------|---------------------------------------------------------------------------------------------------------------|------------------------------------------------------------------------------------------------------------------------------------------------------------------------|------------------------------|--------------------------------------------------|
| 32 | 2019 | Reuben, Jennings (11)                                                                                         | Putting goal-oriented patient care into practice.                                                                                                                      |                              | Journal of the American Geriatrics Society       |
| 33 | 2019 | Salter, Shiner, Lenaghan, Murdoch, Ford, Winterburn, Steel (22)                                               | Setting goals with patients living with multimorbidity: qualitative analysis of general practice consultations.                                                        | Qualitative analysis         | British Journal of General Practice              |
| 34 | 2019 | Tinetti, Naik, Dindo, Costello, Esterson, Geda, Rosen, Hernandez-Bigos, Smith, Ouellet, Kang, Lee, Blaum (44) | Association of patient priorities-aligned decision-making with patient outcomes and ambulatory health care burden among older adults with multiple chronic conditions. | Nonrandomized clinical trial | JAMA internal medicine                           |
| 35 | 2020 | Eckhoff, Weiss (45)                                                                                           | Goal-setting: a concept analysis                                                                                                                                       | Concept analysis             | Nursing Forum                                    |
| 36 | 2020 | Purkale, Nagyaldi, Todd, Mold (46)                                                                            | Physician's response to patient's quality-of-life goals.                                                                                                               |                              | Journal of the American Board of family Medicine |
| 37 | 2020 | Sathanpally, Sidhu, Fahami, Gillies, Kadam, Davies, Khunti, Seidu (47)                                        | Priorities of patients with multimorbidity and of clinicians regarding treatment and health outcomes: a systematic mixed studies review.                               | Systematic review            | BMJ Open                                         |

## 1 Step 4: attributes

2 The systematic analysis of the 37 selected papers could identify many different attributes of goal-  
 3 oriented care. Synthesizing these attributes, goal-oriented care could be described as a multifaceted  
 4 dynamic and iterative process of care (first main attribute) underpinned by patients' values (second  
 5 main attribute). For the process of goal-oriented care 5 sub attributes and 7 descriptive items could be  
 6 identified (table 3). These attributes interact and cannot be interpreted separately.

7 *Table 3 Overview of attributes*

|                                                                         |                                                                             |                                                                                     |
|-------------------------------------------------------------------------|-----------------------------------------------------------------------------|-------------------------------------------------------------------------------------|
| 1. Goal-oriented care is a multifaceted, dynamic and iterative process. | 1.1 Goal-elicitation builds a patient-provider relationship.                |                                                                                     |
|                                                                         | 1.2 Goal-oriented care entails goal-setting.                                | 1.2.1 Patient-provider interaction guides goal-setting.                             |
|                                                                         |                                                                             | 1.2.2 Patients' needs and preferences are the foundation of SMART formulated goals. |
|                                                                         |                                                                             | 1.2.3 Care plan is based on patients' needs and preferences.                        |
|                                                                         |                                                                             | 1.2.4 Care is delivered according to the care plan.                                 |
|                                                                         | 1.3 Goal-evaluation is a reflexive process.                                 | 1.3.1 Feedback should be given to the goals.                                        |
|                                                                         |                                                                             | 1.3.2 Evaluation entails questioning how goals are being met.                       |
| 1.3.3 Goals must be measurable.                                         |                                                                             |                                                                                     |
| 2. Goal-oriented care embraces patients' values.                        | 2.1 Goal-oriented care must be placed in patients' context.                 |                                                                                     |
|                                                                         | 2.2 Goal-oriented care must be tailored to patients' needs and preferences. |                                                                                     |

8 Goal-oriented care is a multifaceted, dynamic and iterative process

9 The majority of the authors presented goal-oriented care as a stepwise approach (1, 3, 4, 6, 11-13, 22,  
 10 23, 34, 36, 39, 40, 48, 49). Even though every paper defined their own approach, overall three stages  
 11 could be identified: (a) goal-elicitation (b) the actual stage of goal-setting and (c) a reflexive goal-  
 12 evaluation stage. These three stages will be further discussed.

13 Bernstein et al. (6) emphasized the dynamic and iterative characteristics of the goal-oriented process  
 14 of care. They described that goal-oriented care entails going back and forth between the three stages

15 (6). From this perspective, goals are not described as an endpoint, but they can be adjusted, discarded,  
16 modified or new goals might be set (11, 32). This will be further discussed in the stage of goal-  
17 evaluation.

18 Overall, in the goal-oriented process of care, the patient is described as an active partner (1).  
19 Therefore, a good communication in a continuous patient-provider relationship is described to be of  
20 utmost importance (40). In addition, goal-oriented care should be considered as care over time rather  
21 than a one-time intervention (50). In terms of outcomes, it is not entirely clear whether goal-oriented  
22 care should focus on (a) maintaining the status quo or (b) improving the patients' situation (11).  
23 Although there is consensus that the care process is oriented to the current needed care rather than  
24 care needed in the future (1).

25 Goal-elicitation builds a patient-provider relationship

26 As described earlier, the overall analysis could identify goal-elicitation as the first stage in the process  
27 of goal-oriented care. In this first stage, providers are presumed to offer time and space to patients to  
28 tell their stories in order to work towards the patients' agenda (23). Therefore, patients have to be  
29 ready and should be actively encouraged to tell their story. Tinetti and colleagues described this as  
30 'the patient's state of readiness' (1). This first stage is considered to be essential to work towards a  
31 balanced patient-provider conversation and relation (46). Salter et al. described this stage as a shared  
32 process between patients and providers that reinforces and further builds their relationship (22). This  
33 specific part of the process of goal-oriented care is also described as a mean to achieve a greater level  
34 of shared understanding and mutual commitment between the patient and the provider (38). Specific  
35 attention to the stage of goal-elicitation is described to create a supportive context for effective goal-  
36 setting in the next stage (22).

37 Goal-oriented care entails goal-setting

38 Next to the goal-elicitation stage, the literature identifies a goal-setting stage. Franklin and colleagues  
39 analyzed patient-provider conversations during goal-setting and concluded that the goal-setting stage

40 serves as a mechanism to embrace patients' needs within the social context he lives in (31). When this  
41 process is done properly, goal-setting should support the patients to continue doing what matters  
42 most to them. This would help them to cope with their conditions (31). Within this process of goal-  
43 setting different sub attributes could be identified that are considered necessary for proper goal-  
44 setting.

#### 45 **Patient-provider interaction guides goal-setting**

46 The patient-provider interaction is characterized by a patient-centered approach (22) in which goals  
47 are set in collaboration (41). Hereby, patients and providers agree on health-related goals (2, 11, 12,  
48 34, 39, 41, 49, 51) and find common ground (50). Tinetti et al. described the importance of considering  
49 patients as active partners in the goal-setting process (32). Rijken et al. mentioned that patients' goals  
50 have to be discussed in a dynamic conversation continuously taking the patients' needs, preferences  
51 and abilities into account (2).

52 To facilitate a collaborative approach it is suggested that providers emphasize the patients' narratives  
53 reflecting their lived experience (38). Next to a collaborative approach, negotiation is important and  
54 considered inevitable (4, 6, 22, 36, 48). Lenzen et al. defined this as goal-negotiation, which involves  
55 discussion of any kind of problems, exploration of the patients' values, needs and capabilities and  
56 deliberation on patients' goals (36). In goal-negotiation, formulating and agreeing on a specific goal  
57 are important components (22).

58 Since the goal-setting process needs to be driven by patients' needs and preferences, there seems to  
59 be a general understanding to shift the focus from the provider to the patient (23). Different authors  
60 reported various strategies to facilitate this shift. Mold stated that the shift implies that prioritization  
61 of the individual health-related goals and the amount of effort in achieving them should be made by  
62 the individual (12). Naik et al. stated that patients are indeed encouraged to share their priorities, but  
63 adds that providers are encouraged to align their care with the patients' health priorities (4). More  
64 recent publications talking about goal-setting describe a circular and shared process aimed at

65 improving the balance and power differentials in the patient-provider relationship (4, 37). This balance  
66 can be improved by putting themselves in someone's shoes to understand the other's constraints (43).

67 **Patients' needs and preferences are the foundation to set goals**

68 One of the important challenges in our understanding of the concept of goal-oriented care is the lack  
69 of clear understanding on patient goals. Nearly all authors described that goals should be grounded on  
70 the patients' needs and preferences (1-4, 6, 22, 23, 31, 32, 37, 40, 46, 48, 50, 52, 53). It is described  
71 that goals should be based on the context, resources and capabilities of patients (46), that they should  
72 be approved by patients (6) and that they should foremost represent what the patients want and not  
73 necessarily what the providers want (11, 40). Other authors recommended the combination of  
74 patients' and providers' goals which could be related to the aspect of goal-negotiation (23, 43).

75 There also seems to be some confusion in the categorization of goals. Some authors emphasized that  
76 goals should contain core values of patients (e.g. the broader aspects that matter most to the patient)  
77 (1, 4) . These goals are named as 'overarching goals' (6, 11, 23, 40) leading to a broad description of  
78 the goal (e.g. I want to live in my own home as long as possible (1)) (6). Others argued that these  
79 overarching goals might not be easy to work with and describe that these goals should be broken down  
80 into sub goals (e.g. I want to walk 2 blocks without shortness of breath (1)) (6). Goals differ for each  
81 individual and will change over time (12). Aside from overarching goals and sub goals many of the  
82 authors mention the importance of setting SMART goals (1, 6, 22, 23, 34, 45, 48-50). A SMART goal is  
83 created when patients and providers collaborate to untangle the goal itself, the importance of that  
84 goal is emphasized to the patient, the perceived achievability of the goal is evaluated, as well as the  
85 timing of the goal and any supports and resources available (34). On the meta-perspective, overarching  
86 goals are too broad to make SMART (think about the grandmother aiming to get her grandchildren  
87 from school as long as possible). Therefore they should be divided in the sub-goals (in sub goals such  
88 as I need to be able to walk without being tired after 10 yards) that are specific enough to be measured.



89 In one of his first publications Mold brings in a specific discourse around the type of goals namely that  
90 goal-oriented care should assist patients in achieving their maximum individual health potential (12),  
91 hereby making the link with health. One should however notice that health should be described from  
92 the patients' perspective; as the ability to live his life, and not as the absence of disease (1, 12).  
93 Patients' goals are oriented towards health outcome goals. Patients hope to achieve these individual  
94 health outcomes through their health care (e.g. function, social activities and symptom relief)(1).  
95 Health outcome goals describe activities that promote change in physical and cognitive well-being or  
96 health (35). Naik et al. specifically relate patient goals to the care they are willing to receive and able  
97 to perform (4).

#### 98 **Care plan is based on patients' needs and preferences**

99 Many authors relate goal-oriented care to the construction of a care plan based on the patients' needs  
100 and preferences and specifically mention that these care plans should reflect the patients' personal  
101 goals that have been identified in the previous stage (1-3, 6, 11, 25, 27). There is a consensus that the  
102 care plan should reflect the question: 'What matters to you?' (11, 32, 43, 48, 52). Strategies to achieve  
103 the patients' needs and preferences should be implemented in the care plan (12). Furthermore,  
104 Bernsten and colleagues stated that the care plan might also include an interprofessional review of the  
105 goals (6). Therefore, it is necessary to involve all providers and preferably patients' informal care giver  
106 and family in the whole process (3, 6, 13). An interprofessional review of the goals might benefit the  
107 coordination of the care plans between the different providers and facilitate integrated care delivery  
108 (1, 4, 29).

109

110

111

112

113 **Care delivery according to the care plan**

114 Patients and providers should implement the care plan and translate it into care delivery. Although,  
115 little is known about how care should be delivered, it is evident that it must be in accordance with the  
116 care plan that is set up in the previous stage (6). For this stage Tinetti et al. specifically mentioned to  
117 start the stage of care delivery by prioritizing on simple interventions in order to achieve one or more  
118 small goals to keep patients motivated (1). This simple interventions could focus on the sub-goals  
119 described in previous paragraphs to eventually work towards the overarching goals.

120 Goal-evaluation is a reflective process

121 The overall synthesis/analysis of the literature could identify goal-evaluation as the third and final  
122 stage in the process of goal-oriented care. For this stage authors described a dynamic and iterative  
123 process that allows reflection and feedback next to assessing whether and how goals have been met  
124 (32, 48). In this process goals can be redefined and adjusted. Possible reasons to adjust goals might be  
125 that goals have been too difficult to achieve or were no longer desired or relevant to the patients'  
126 situation (11). Although many authors acknowledge the possibility and importance of goal adjustment,  
127 there is also discussion that goal-oriented processes of care requires that goals can be measured (12).  
128 Steele Gray and colleagues described the importance of qualifying and quantifying the process  
129 proceeded to achieve the goals (39). In contrast, Salter and colleagues described that making the goals  
130 measurable could overcomplicate and distance the patient from their own goal and might therefore  
131 not be beneficial to the process of goal-oriented care (22).

132 Goal-oriented care embraces patients' values

133 In the previous attributes, goal-oriented care is described as a dynamic and iterative process in which  
134 two underpinning values are identified (4). Firstly, goal-oriented care must be placed in the patient's  
135 context and secondly, goal-oriented care must be tailored to the patient's needs and preferences.

136

137 Goal-oriented care must be placed in patients' context

138 The whole goal-oriented process of care starting from goal-elicitation to goal-evaluation needs to be  
139 placed in the patient's context. According to different authors this means that the process must be  
140 tailored to the patient's situation (3, 11, 36, 52). This does not only refer to the personal context, but  
141 also to the social and the cultural context. Therefore, this process is influenced by different contextual  
142 factors that should must be taken into account when developing the care plan (29, 36).

143 Goal-oriented care must be tailored to patients' needs and preferences

144 When reviewing the attributes, it is clear that patients' needs and preferences form the common  
145 thread. The question 'What is the matter with the patient' must be retranslated to 'What matters to  
146 the patient?' (1, 6, 22, 32). This question enables patients to tell their story and open up in which they  
147 are considered to reflect on their achievements and personal agenda (23). As a result, patients will  
148 have the feeling to be approached as a person instead of through their condition (6).

## 149 **CASES**

150 The method of Walker and Avant prescribes that several cases should be described to illustrate the  
151 attributes defined in step 4 (20). The first case of Joseph encompasses all the attributes identified in  
152 the literature and is therefore identified as a model case. It is a fictive example of delivering care  
153 according to the goal-oriented process of care with focus on the underpinning attributes. The second  
154 case of Ben is identified as an additional case since it lacks one or more of the attributes. E.g. in the  
155 case of Ben the stage of goal-evaluation is missing. This stage is needed to make adjustment and  
156 reflections according to the process of achieving the personal goals. Finally, the third case of Mary is  
157 an example of the opposite of goal-oriented care. This is described as a contrary case. In this case, the  
158 health care provider does not take the needs and preferences of Mary into account. The provider only  
159 thinks about convincing Mary of a healthy lifestyle which for her is not the main reason to visit her  
160 health care provider. Her main focus is on being able to go on a city trip to Madrid.

Joseph, 68- year old suffers from diabetes, hypertension and cardiovascular disease. Throughout his entire working life, he was a secondary school teacher. He has been retired for three years now. Despite the fact that he is limited by his health condition, he loves spending time with gardening and playing with his grandchildren.

A few years ago he was a passionate cyclist, but his racing bike has been stored for a long time now. His friends encourage him to cycle with them on a weekly base. His wife supports this initiative and argues that this will be beneficial for his social contact.

Every month Joseph visits his family doctor for a check-up. For each consultation, he prepares a list of things he wants to discuss. He has the chance to share his story in an open communication in which trust and mutual respect are key components.

In his monthly check-up with his family doctor he suggests his wishes to cycle again with his friends. His doctor doubts whether this will be possible and after discussion and negotiation, they pl  that

*Box 1 Model case of Joseph*

161

162

163

Ben, a 30-year old man, was renovating a house that he bought with his girlfriend when he was diagnosed with MS. They made plans to marry next year and to make a world trip as honeymoon. These plans have been put aside due to the recent diagnosis. Although he was feeling down and did not have the energy to do anything he ended up with an excellent physician. Initiated by the interaction and the conversation with his physician he was enabled to set goals again and to look

*Box 2 Additional case of Ben*

Mary is a 40-year old mother of two children and dealing with obesity since her childhood. Due to her weight, she has a lot of joints pain and is short of breath which limits her exercising capacity. In the upcoming summer, she wants to make a city trip with the entire family to Madrid. Therefore she is seeing her physician to discuss the options to travel as painless and comfortable as possible. Her physician does not allow the travel plans and instructs her to first strive for a healthy weight and then plan trip when she has lost weight. This is not aligned with the wishes of Mary who only want's a short-term solution to cope with her condition during the city trip. In the end, she leaves the consultation room with a referral to a dietitian and sport coach.

*Box 3 Contrary case of Mary*

164

165

166

167

168

169

170

## 171 **Antecedents**

172 Antecedents are events or incidents that occur prior to the investigated concept. In this concept  
173 analysis, provider preparedness and patient preparedness are required to provide goal-oriented care.

174 In terms of provider preparedness many authors discussed the importance of training (6, 7, 23, 27, 31,  
175 41, 49). Notwithstanding that several authors (1, 4, 13, 22, 27, 32, 37) mentioned the importance of  
176 trained health care providers, there was a difference in the training they received (supplementary file  
177 2). Differences can be found in the target population reached with the training, both in  
178 monodisciplinary and interprofessional training (e.g. general practitioners (22), practice nurses (27),  
179 duration of the training (e.g. three hour (22), number of sessions (27)) and training method (e.g. role-  
180 play (32)) . Thereby, the content of the training was tailored to the skills needed to carry out the  
181 intervention correctly and differ therefore in each training.

182 A second aspect that is discussed concerning provider preparedness focused on the personal skills of  
183 providers (1, 6, 13, 22). These include communication and balancing skills in which an open  
184 communication with the patient is necessary and in which an equal balance between the patient and  
185 provider is a premise (1, 6, 13, 22). Other defined skills were the provider's ability to listen, understand  
186 and bearing witness to the patient's story (22) and their willingness to change and learn new skills to  
187 provide care according to the goal-oriented process of care (1).

188 Next to provider preparedness some authors (1, 11, 41) specifically talk about the need of patient  
189 preparedness. Patients needed to be prepared to share their needs and preferences when entering a  
190 care relationship (1). Some authors translate the importance of patient preparedness into patient  
191 education (1), others talked about patient guidance (11) or supporting patients in developing the skills  
192 to set personal goals (36).

193

194

## 195 **Consequences**

196 Consequences are those events or incidents that occur as a result of a concept. For the concept of goal-  
197 oriented care, the consequences defined throughout the papers could be categorized in: (a) patient-  
198 related consequences (1, 3, 4, 23, 29, 48), (b) provider-related consequences (1, 22, 29, 48), (c) care-  
199 related consequences (1, 22, 29) and (d) general consequences (4, 6, 29).

200 Patient-related consequences are the results for patients themselves after they received care following  
201 a goal-oriented process. A goal-directed approach could be expected to increase patient satisfaction,  
202 since the values, preferences, knowledge and opinions that each patient brought to the provider-  
203 patient relationship was more valued (38). Also, emphasis was put on the changed way of  
204 communicating in which patients felt more freely and able to speak (3). This led to the overall feeling  
205 of being heard, understood, respected and engaged in their care (29). Furthermore, a goal-oriented  
206 process of care could lead to a better understanding and more in-depth knowledge of patients  
207 regarding their health, activation of patients to be more involved in their care and an increase in their  
208 overall commitment. This resulted in the increase of adherence (3). Also Mold argued that it could  
209 contribute to a better adherence (12). In general, the gained in-depth knowledge of patients  
210 concerning their health and a better understanding of their tasks could help to improve their quality  
211 of life (3). This was enhanced by the maximization of function and the independency patients gained  
212 (12).

213 For providers, goal-oriented care assisted healthcare them in their decision-making (29) and gave them  
214 the opportunity to get to know their patients better. It enhanced patient-provider collaboration (12)  
215 and contributed therefore to more job satisfaction (22).

216 Care-related consequences were mainly focused on reducing costs, overtreatment and fragmentation  
217 (1, 22, 29), since care oriented to patients' priorities would reduce tests and treatments (44). Bernsten

218 et al. stated also that goal-oriented care could lead to an improvement of quality of care and quality  
219 of life (6).

220 Although, many positive outcomes have been presented, Reuben et al. mentioned a possible downside  
221 of goal-oriented care (10). They described that some decisions to strive for personal goals may worsen  
222 the providers' performance on aggregated health measures. For example, when a diabetic patient  
223 chooses to not follow his diet and keep on smoking, because it would be a too big lifestyle change, his  
224 HbA1c-level would not be aligned with the guidelines. Although, it could be a positive outcome from  
225 the patient perspective, it would influence the quality of care provided and the population health in a  
226 negative way.

227

228

229

230

231

232

233

234

235

236

237

238

239



## 240 Empirical referents

241 Empirical referents provide an overview of the identified assessments tools related to the attributes  
 242 aiming to make the concept measurable.

243 None of the papers mentioned an empirical referent to measure the entire concept of goal-oriented  
 244 care. Therefore, tools have been searched for each individual sub-attribute. Examples are listed in  
 245 table 4 which gives an overview of possible tools and presents an example item presented in that  
 246 tool. Listing the existing individual empirical referents might initiate the development of an overall  
 247 empirical referent.

248 *Table 4 Empirical referents*

| Attribute                                            | Example of item in the assessment tool                                                                                                                                                                                                                                                 |
|------------------------------------------------------|----------------------------------------------------------------------------------------------------------------------------------------------------------------------------------------------------------------------------------------------------------------------------------------|
| Goal-elicitation                                     |                                                                                                                                                                                                                                                                                        |
| Davis Observation Code (DOC) (54)                    | Discussing family, medical, or social history and/ or current family functioning.                                                                                                                                                                                                      |
| Goal-setting                                         |                                                                                                                                                                                                                                                                                        |
| Patient goal priority questionnaire (55)             | Which activities are most important for you to manage?                                                                                                                                                                                                                                 |
| Self-identified goals assessment (56)                | Think about all of the things you want to be able to do. It might help to think about the things you did at home before you went to the hospital, and things that are hard to do now. What types of things would you like to work on or improve on in therapy before you go back home? |
| Goal-setting questionnaire                           | What are some specific goals you have in life?                                                                                                                                                                                                                                         |
| CCM (57)                                             | Semi-structured interview – discussing daily functioning and personal life.                                                                                                                                                                                                            |
| Health outcome prioritization tool (58)              | I would like to know how important ‘keeping you alive’, ‘maintaining independence’, ‘reducing or eliminating pain’ and ‘reducing or eliminating symptoms of dizziness, fatigue, shortness of breath’ is to you.                                                                        |
| EPRO-tool (59)                                       | Goal-setting for five different areas identified as most important.                                                                                                                                                                                                                    |
| Goal-evaluation                                      |                                                                                                                                                                                                                                                                                        |
| Goal-attainment scale (60)                           | Determining goal-attainment using 5-point scale.                                                                                                                                                                                                                                       |
| PACIC (61)                                           | Asked to talk about my goals in caring for my condition.                                                                                                                                                                                                                               |
| Goal-setting evaluation tool (62)                    | Does the plan identify specific actions or activities that could help to reach the goal?                                                                                                                                                                                               |
| Person’s context and patient’s needs and preferences |                                                                                                                                                                                                                                                                                        |
| Person-centered primary care measure (PCPCM) (63)    | My doctor or practice knows me as a person/ Over time, the practice helps me to meet my goals.                                                                                                                                                                                         |
| Patient centered observation form (64)               | Collaborative upfront agenda setting.                                                                                                                                                                                                                                                  |

249

250 **CONCLUSION OF THE CONCEPT ANALYSIS**

251 Figure 2 represents the overall synthesis of this concept analysis of goal-oriented care. Goal-oriented  
252 care could be described as a health care approach encompassing a multifaceted, dynamic and iterative  
253 process underpinned by the patient’s context and values. The process is characterized by three stages:  
254 goal-elicitation, goal-setting and goal-evaluation in which patients’ needs and preferences form the  
255 common  read. In order to be able to deliver care according to the principles of the goal-oriented  
256 care process, both providers and patients need to be prepared. In terms of the consequences of goal-  
257 oriented care literature points to the potential of goal-oriented care to improve patients’ experiences  
258 and provider well-being, the potential to reduce costs and improve the overall health of the  
259 population. Furthermore, a model, a  and an additional case illustrated an example of goal-  
260 oriented care in practice. The empirical referents showed that it is currently not possible to measure  
261 goal-oriented care in its entirety and presented an overview of possible referents for each sub  
262 attribute. Although the literature allowed us to gain more insight into the concept of goal-oriented  
263 care, different aspects need to be further discussed.

264 **Figure 2: Schematic representation of the antecedents, attributes and consequences**

265

266

267

268

269

270

271

272

## 273 **Discussion and conclusion**

274 This concept analysis aimed to tackle the lack of a common understanding of goal-oriented care by  
275 identifying the attributes, antecedents and consequences using the method of Walker and Avant (20).  
276 The overall analysis showed that a goal-oriented care generally entails three stages. Despite these  
277 three stages the process of goal-oriented care cannot be implemented as a linear protocol or checklist.  
278 Two underpinning attributes, the patient's context and the patient's needs and preferences form the  
279 common thread throughout this goal-oriented process of care. These underpinning attributes  
280 represent the philosophy of care. Goal-oriented care is a continuous interaction where you go back  
281 and forth to gain a person-centered approach (Figure 2).

282 In the stage of goal-elicitation, greater consideration should be given to the patients' peripheral  
283 narrative reflecting their lived experiences (31). Several authors have investigated components of goal-  
284 elicitation. Murdoch and colleagues performed a conversation analysis of patients-providers  
285 interaction during their encounters and found that eliciting the patients' understanding is an important  
286 component (65). Ospina et al. investigated the extent to which patients' concerns are elicited across  
287 different clinical settings (66). They concluded that providers seldom elicit the patients' agenda. This  
288 reduces the chance that providers will orient their consultation towards the specific aspects that  
289 matter to the patient (66). One of the prerequisites to succeed in goal-elicitation is the mutual  
290 understanding about the expectations of the consultations between patients and providers and a  
291 qualitative relationship between patients and providers (65). The literature also mentions that patients  
292 need to have a set of skills to make appropriate health decisions and reflect on their health care choices  
293 (67). They have to be capable to open up and tell their story (68). It is important that patients  
294 understand the meaning of information communicated by the provider, must appreciate the  
295 consequences of the treatment options and must reason about the information based on his or her  
296 own values and preferences (68).

297 Next to the stage of goal-elicitation, the stage of goal-setting is defined. One of the remaining  
298 knowledge gaps is on what kind of goals patients set. Various work in different settings identified that  
299 patients do not necessarily have clearly defined goals for themselves (65). Although, several authors  
300 performed research on the categorization of patients' goals. Vermunt et al. performed for example a  
301 qualitative study to develop conceptual descriptions of goal-oriented care (41). They presented a  
302 three-level goal hierarchy containing disease- or symptom specific goals, functional goals and  
303 fundamental goals which provides more insight in the type of goals. A second example is the distinction  
304 made by Schellinger et al. between medical, nonmedical, multiple and global goals (40). Not only  there  
305 is ambiguity on what goals patients set, it is also not clear how goals are being set. The systematic  
306 review of tools to assess patient treatment priorities and preferences by Mangin et al. found few  
307 relevant tools to set patient's goals (29). They argue for the need to develop specific strategies to make  
308 patient priorities visible in the clinical record and medical-decision making (29).

309 Goal-evaluation is pointed out as the last stage. As presented in the results, several authors described  
310 that goals should be made measurable for evaluation (22, 59). There are some pitfalls related to goal-  
311 evaluation. Salter et al. described that not all goals lend themselves to being measured (22). It is for  
312 example challenging to evaluate the goal 'I want to take my grandchildren from school as long as  
313 possible'. Another pitfall is that patients' goals would be simplified to what can be measured. Working  
314 towards goal-evaluation might increase the pressure on patients and providers to work in the same  
315 way as disease-specific guidelines do (69). Especially from the perspective of patients with  
316 multimorbidity it can be questioned whether disease-specific guidelines that are good for the disease  
317 are also good for the patient (69). Furthermore, evidence shows that older multimorbid patients place  
318 quantitative health outcomes, such as longer survival, on a lower level of importance (69). The focus  
319 must be on the patients' values and make healthcare more humane (38).

320 As mentioned for the antecedents it is important that patients and providers are prepared to work  
321 towards a goal-oriented process of care. The collaboration and co-creation between the two partners

322 and in an interprofessional team is an important but insufficient prerequisite to succeed in providing  
323 goal-oriented care. Currently, patients are not stimulated to think about their care. They have to be  
324 stimulated to actively engage their narrative and to share their priorities. Also providers have to  
325 develop complementary skills in which they learn to let go their own assumptions and solutions. They  
326 have to learn to integrate patients' narrative in their care plan and improve their communication skills  
327 to strengthen the mutual understanding between them (70). Voigt et al. observed that GPs are  
328 unaware of patients' priorities in daily life, which were in contrast with their perceived importance of  
329 patient's medical goals (70). Training and tools could provide the guidance needed to improve the  
330 communication(1, 4, 13, 22, 27, 32, 37). It could support providers in structuring the conversation, to  
331 set goals in collaboration with patients and to align their care to those goals. Not only does goal-  
332 oriented care offers a specific approach for one-on-one interaction between patients and providers, it  
333 could also facilitate interprofessional collaboration. It gives providers from diverse disciplines the  
334 opportunity to deliver care following the same principles and to focus on pursuing patients' goals (34).  
335 Therefore training should also include the interprofessional perspective to facilitate a uniform attitude  
336 towards the patients' goals and principles of goal-oriented care in the entire team.

337 In terms of the consequences of goal-oriented care, limited studies have been able to demonstrate  
338 outcomes of goal-oriented care. Mostly positive outcomes have been presented towards the patients,  
339 providers, health system and overall population well-being. In that respect, goal-oriented care shows  
340 the potential to meet the components of the quadruple aim. It can be questioned if all providers  
341 experience increased satisfaction and well-being in providing goal-oriented care. Providers have to  
342 learn to cope with another way of delivering care. For example, a changed medication scheme as  
343 described in Josephs' case in order to work towards patients' goals. This goes against their basic  
344 principles to strive for the best possible health status including a comprehensive medication scheme.  
345 Besides that the provider well-being can be questioned, Blom et al. also contradicted the positive  
346 results for the health care system. They did not find a beneficial effect in health care use and costs  
347 when using a proactive, goal-oriented, integrated care model (27).

348 One of the reasons of the limited number of effectiveness studies of goal-oriented care is the lack of  
349 empirical referents. The concept must still undergo the transition towards an evaluable concept. Goal-  
350 oriented care is however identified by Etz and colleagues as one of the main constructs when  
351 developing a new comprehensive measure of high-value aspects of primary care, however they did  
352 not mention how it has to be done (71). Also Young et al. described outcome goals as a main construct  
353 when differentiating processes and outcomes for primary care and divided it further in goal-clarity for  
354 multimorbidity, goal-clarity for unique patient priorities and goal timing (72). It is clear that in order to  
355 gain more insight in the consequences of goal-oriented care further research must primarily focus on  
356 how goal-oriented care is provided and can be supported. In order to investigate the potential benefits  
357 of goal-oriented care, research also needs to work on developing indicators of the goal-oriented  
358 process of care.

## 359 Strengths, limitations and recommendations

360 The method of Walker and Avant provides a rigorous and systematic approach to refine the concept  
361 of goal-oriented care through the existing literature. A concept analysis is an exploration of an evolving  
362 concept which will need to be enriched by new knowledge. Therefore, it is influenced by contextual  
363 factors and must undergo adjustments to new implications and new insights based on further  
364 research. The iterative process of adding new articles following the snowballing method is one of the  
365 strengths compared to other types of reviews. In this concept analysis, this led to a larger number of  
366 articles than the original search. A possible explanation for this might be that goal-oriented care was  
367 covered by synonyms or similar concepts that were not covered by the original search. Despite the  
368 systematic approach, a concept analysis does not comprise a quality assessment of the literature.  
369 However, it seemed to be an appropriate method to provide the knowledge needed to understand the  
370 different components of goal-oriented care in its entirety.

371 The literature search identified both original research papers and position papers. Some original  
372 research papers (3, 4, 22, 39, 40) evaluated goal-oriented care in clinical practice. These papers

373 identified and described goal-oriented care as a stepwise intervention. Position papers (1, 11, 12, 34,  
374 36) mostly described components of goal-oriented care rather than such a stepwise approach. The  
375 combination of both types gave more insight in the broad components of goal-oriented care.

376 This concept analysis could also be considered as a preliminary step to facilitate further research. One  
377 of the knowledge gaps revealed in this concept analysis is the lack of knowledge on what patients'  
378 goals are set, how goal-oriented care is delivered and how it is best put into practice in both one-on-  
379 one interactions between patients and providers and in interprofessional collaboration. In addition,  
380 the list of empirical referents made clear that a golden standard to evaluate goal-oriented care is  
381 missing. Initiating the development of an evaluation method could enable future intervention studies  
382 to gain more insight in the consequences of goal-oriented care and to make results comparable. This  
383 might be required to convince providers and policy makers of the benefits of goal-oriented care.

384 Goal-oriented care shows the potential to be a way forward for patients with chronic conditions and  
385 multimorbidity. However, further research is needed to further translate the current knowledge on  
386 the concept of goal-oriented care into a tangible workflow process of care that entails the three stages.  
387 This workflow should include the skills and tools patients and providers need to implement goal-  
388 oriented care in practice.

## 389 Conclusion

390 This concept analysis aimed to translate the concept of goal-oriented care into a common  
391 understanding so providers can better understand and use this concept in clinical practice. The various  
392 literature on goal-oriented care, based on position and original research papers, showed a stepwise  
393 approach of three stages. Overall, the underpinning attributes of patients' context and patients' values  
394 form a philosophy of care to which the process must be reflected. Furthermore, both patients and the  
395 providers need to develop new skills in order to rethink the way care is provided. Patients must  
396 therefore be enabled to open up and reflect on their own agenda. Providers instead must learn to let

397 go their own assumptions and solutions and communicate with their patients in a more balanced  
398 context. Based on the literature goal-oriented care shows the potential to improve patients'  
399 experience by listening to their needs and preferences, improve providers' well-being by the feeling of  
400 more satisfaction and reduce health care costs. Goal-oriented care could answer the challenges  
401 patients face with multiple care processes by initiating interprofessional collaboration. However,  
402 further research must focus on what and how goals are set, the translation of these findings into a  
403 workflow and must initiate the development of an evaluation method in order to investigate the  
404 effects of goal-oriented care processes on patients, providers and the health care system.

## 405 **Acknowledgments**

406 We are grateful for the partnership with the Primary Care Academy ([academie-eerstelijjn.be](http://academie-eerstelijjn.be)) and want  
407 to thank the King Baudouin Foundation for the opportunity they offer us for conducting research and  
408 have impact on the primary care of Flanders, Belgium.

409

410

411

412

413

414

415

416

417



## 418 References

- 419 1. Tinetti ME, Esterson J, Ferris R, Posner P, Blaum CS. Patient Priority-Directed Decision Making  
420 and Care for Older Adults with Multiple Chronic Conditions. *Clinics in geriatric medicine*.  
421 2016;32(2):261-75.
- 422 2. Rijken M, Bekkema N, Boeckxstaens P, Schellevis FG, De Maeseneer JM, Groenewegen PP.  
423 Chronic Disease Management Programmes: an adequate response to patients' needs? *Health Expect*.  
424 2014;17(5):608-21.
- 425 3. Feder SL, Kiwak E, Costello D, Dindo L, Hern, ez-Bigos K, et al. Perspectives of Patients in  
426 Identifying Their Values-Based Health Priorities. *Journal of the American Geriatrics Society*. 2019  
427 67(7):1379-85.
- 428 4. Naik AD, Dindo LN, Van Liew JR, Hundt NE, Vo L, Hern, et al. Development of a Clinically  
429 Feasible Process for Identifying Individual Health Priorities. *Journal of the American Geriatrics*  
430 *Society*. 2018;66(10):1872-9.
- 431 5. Cassell A, Edwards D, Harshfield A, Rhodes K, Brimicombe J, Payne R, et al. The epidemiology  
432 of multimorbidity in primary care: a retrospective cohort study. *Br J Gen Pract*. 2018;68(669):e245-  
433 e51.
- 434 6. Berntsen G, Hoyem A, Lettrem I, Ruland C, Rumpsfeld M, Gammon D. A person-centered  
435 integrated care quality framework, based on a qualitative study of patients' evaluation of care in light  
436 of chronic care ideals. *BMC Health Serv Res*. 2018;18(1):479.
- 437 7. Ploeg J, Matthew-Maich N, Fraser K, Dufour S, McAiney C, Kaasalainen S, et al. Managing  
438 multiple chronic conditions in the community: a Canadian qualitative study of the experiences of  
439 older adults, family caregivers and healthcare providers. *BMC Geriatr*. 2017;17(1):40.
- 440 8. Kramer MH, Bauer W, Dicker D, Durusu-Tanriover M, Ferreira F, Rigby SP, et al. The changing  
441 face of internal medicine: patient centred care. *European journal of internal medicine*.25(2):125-7.
- 442 9. Kuluski K, Peckham A, Gill A, Gagnon D, Wong-Cornall C, McKillop A, et al. What is Important  
443 to Older People with Multimorbidity and Their Caregivers? Identifying Attributes of Person Centered  
444 Care from the User Perspective. *International journal of integrated care*. 2019;19(3):4.
- 445 10. Reuben DB, Tinetti ME. Goal-oriented patient care--an alternative health outcomes  
446 paradigm. *N Engl J Med*. 2012;366(9):777-9.
- 447 11. Reuben DB, Jennings LA. Putting Goal-Oriented Patient Care Into Practice. *Journal of the*  
448 *American Geriatrics Society*. 2019;67(7):1342-4.
- 449 12. Mold JW, Blake GH, Becker LA. Goal-oriented medical care. *Family medicine*. 1991;23(1):46-  
450 51.
- 451 13. Vermunt N, Harmsen M, Westert GP, Olde Rikkert MGM, Faber MJ. Collaborative goal setting  
452 with elderly patients with chronic disease or multimorbidity: a systematic review. *BMC Geriatr*.  
453 2017;17(1):167.
- 454 14. Hobbs FR, Bankhead C, Mukhtar T, Stevens S, Perera-Salazar R, Holt T, et al. Clinical workload  
455 in UK primary care: a retrospective analysis of 100 million consultations in England, 2007–14. *The*  
456 *Lancet*. 2016;387(10035):2323-30.
- 457 15. IoMDoHCSCotFoP C, Donaldson M, Yordy K, Vanselow N. Defining primary care: an interim  
458 report. National Academy Press; 1994.
- 459 16. Ellner AL, Phillips RS. The Coming Primary Care Revolution. *J Gen Intern Med*.  
460 2017;32(4):380-6.
- 461 17. Poitras ME, Maltais ME, Bestard-Denomme L, Stewart M, Fortin M. What are the effective  
462 elements in patient-centered and multimorbidity care? A scoping review. *BMC Health Serv Res*.  
463 2018;18(1):446.
- 464 18. Elwyn G, Durand MA, Song J, Aarts J, Barr PJ, Berger Z, et al. A three-talk model for shared  
465 decision making: multistage consultation process. *Bmj*. 2017;359:j4891.

- 466 19. Lusk JM, Fater K. A concept analysis of patient-centered care. *Nurs Forum*. 2013;48(2):89-98.
- 467 20. Walker LOA, K.C. Strategies for theory constructing in nursing. Texas 2019.
- 468 21. Mourad Ouzzani HH, Zbys Fedorowicz, and Ahmed Elmagarmid. Rayyan - a web and mobile  
469 app for systematic reviews. . *Systematic Reviews*. 2016;5(210).
- 470 22. Salter C, Shiner A, Lenaghan E, Murdoch J, Ford JA, Winterburn S, et al. Setting goals with  
471 patients living with multimorbidity: qualitative analysis of general practice consultations. *Br J Gen  
472 Pract*. 2019;69(684):e479-e88.
- 473 23. Kessler D, Walker I, Sauve-Schenk K, Egan M. Goal setting dynamics that facilitate or impede  
474 a client-centered approach. *Scandinavian journal of occupational therapy*. 2018;26(5):315-24.
- 475 24. De Maeseneer J, Boeckxstaens P. Care for noncommunicable diseases (NCDs): time for a  
476 paradigm-shift. *World hospitals and health services : the official journal of the International Hospital  
477 Federation*. 2011;47(4):30-3.
- 478 25. Bayliss EA, Bonds DE, Boyd CM, Davis MM, Finke B, Fox MH, et al. Understanding the context  
479 of health for persons with multiple chronic conditions: moving from what is the matter to what  
480 matters. *Ann Fam Med*. 2014;12(3):260-9.
- 481 26. Berntsen GK, Gammon D, Steinsbekk A, Salamonsen A, Foss N, Ruland C, et al. How do we  
482 deal with multiple goals for care within an individual patient trajectory? A document content analysis  
483 of health service research papers on goals for care. *BMJ open*. 2015;5(12):e009403.
- 484 27. Blom J, Elzen WD, Houwelingen Anne HV, Heijmans M, Stijnen T, Van Den Hout W, et al.  
485 Effectiveness and cost-effectiveness of a proactive, goal-oriented, integrated care model in general  
486 practice for older people. A cluster randomised controlled trial: Integrated systematic care for older  
487 people-the ISCOPE study. *Age and Ageing*. 2016;45(1):30-41.
- 488 28. Boeckxstaens, Willems, Lanssens, Decuypere, Brusselle, Kühlein, et al. A qualitative  
489 interpretation of challenges associated with helping patients with multiple chronic diseases identify  
490 their goals. *Journal of comorbidity*. 2016;6(2):120-6.
- 491 29. Mangin D, Stephen G, Bismah V, Risdon C. Making patient values visible in healthcare: a  
492 systematic review of tools to assess patient treatment priorities and preferences in the context of  
493 multimorbidity. *BMJ Open*. 2016;6(6):e010903.
- 494 30. Schmidt K, Babac A, Pauer F, Damm K, von der Schulenburg JM. Measuring patients' priorities  
495 using the Analytic Hierarchy Process in comparison with Best-Worst-Scaling and rating cards:  
496 methodological aspects and ranking tasks. *Health economics review*. 2016;6(1):50.
- 497 31. Franklin M, Lewis S, Willis K, Rogers A, Venville A, Smith L. Controlled, Constrained, or  
498 Flexible? How Self-Management Goals Are Shaped By Patient-Provider Interactions. *Qualitative  
499 health research*. 2019;1049732318774324.
- 500 32. Tinetti M, Dindo L, Smith CD, Blaum C, Costello D, Ouellet G, et al. Challenges and strategies  
501 in patients' health priorities-aligned decision-making for older adults with multiple chronic  
502 conditions. *PloS one*. 2019;14(6):e0218249.
- 503 33. Hurn J, Kneebone I, Cropley M. Goal setting as an outcome measure: A systematic review.  
504 *Clinical rehabilitation*. 2006;20(9):756-72.
- 505 34. Bodenheimer T, Handley MA. Goal-setting for behavior change in primary care: an  
506 exploration and status report. *Patient Educ Couns*. 2009;76(2):174-80.
- 507 35. Junius-Walker U, Stolberg D, Steinke P, Theile G, Hummers-Pradier E, Dierks M-L. Health and  
508 treatment priorities of older patients and their general practitioners: a cross-sectional study. *Quality  
509 in primary care*. 2011;19(2).
- 510 36. Lenzen SA, Daniels R, van Bokhoven MA, van der Weijden T, Beurskens A. Setting goals in  
511 chronic care: Shared decision making as self-management support by the family physician. *Eur J Gen  
512 Pract*. 2015;21(2):138-44.
- 513 37. Kangovi S, Mitra N, Smith RA, Kulkarni R, Turr L, Huo H, et al. Decision-making and goal-  
514 setting in chronic disease management: Baseline findings of a randomized controlled trial. *Patient  
515 Educ Couns*. 2017;100(3):449-55.
- 516 38. Mold. Goal-directed health care: redefining health and health care in the era of value-based  
517 care. *Cureus* 2017;9(2).

- 518 39. Steele Gray C, Wodchis WP, Upshur R, Cott C, McKinstry B, Mercer S, et al. Supporting Goal-  
519 Oriented Primary Health Care for Seniors with Complex Care Needs Using Mobile Technology:  
520 Evaluation and Implementation of the Health System Performance Research Network, Bridgepoint  
521 Electronic Patient Reported Outcome Tool. *JMIR research protocols*. 2016;5(2):e126.
- 522 40. Schellinger SE, Anderson EW, Frazer MS, Cain CL. Patient Self-Defined Goals: Essentials of  
523 Person-Centered Care for Serious Illness. *The American journal of hospice & palliative care*.  
524 2018;35(1):159-65.
- 525 41. Vermunt NP, Harmsen M, Elwyn G, Westert GP, Burgers JS, Olde Rikkert MG, et al. A three-  
526 goal model for patients with multimorbidity: A qualitative approach. *Health expectations : an*  
527 *international journal of public participation in health care and health policy*. 2018;21(2):528-38.
- 528 42. de Groot E, Schonrock-Adema J, Zwart D, Damoiseaux R, Van den Bogerd K, Diemers A, et al.  
529 Learning from patients about patient-centredness: A realist review: BEME Guide No. 60. *Medical*  
530 *teacher*. 2019:1-13.
- 531 43. Kuluski K, Guilcher SJT. Toward a Person-Centred Learning Health System: Understanding  
532 Value from the Perspectives of Patients and Caregivers. *HealthcarePapers*. 2019;18(4):36-46.
- 533 44. Tinetti ME, Naik AD, Dindo L, Costello DM, Esterson J, Geda M, et al. Association of Patient  
534 Priorities-Aligned Decision-Making with Patient Outcomes and Ambulatory Health Care Burden  
535 among Older Adults with Multiple Chronic Conditions: A Nonrandomized Clinical Trial. *JAMA Intern*  
536 *Med*. 2019.
- 537 45. Eckhoff DO, Weiss J. Goal setting: A concept analysis. *Nursing forum*. 2020.
- 538 46. Purkale BA, Nagykalai ZJ, Allahyar A, Todd R, Mold JW. Physicians' Response to  
539 Patients' Quality-of-Life Goals. *The Journal of the American Board of Family Medicine*.  
540 2020;33(1):71.
- 541 47. Sathanapally H, Sidhu M, Fahami R, Gillies C, Kadam U, Davies MJ, et al. Priorities of patients  
542 with multimorbidity and of clinicians regarding treatment and health outcomes: a systematic mixed  
543 studies review. *BMJ Open*. 2020;10(2):e033445.
- 544 48. Reuben DB, Tinetti ME. Goal-oriented patient care - An alternative health outcomes  
545 paradigm. *New England Journal of Medicine*. 2012;366(9):777-9.
- 546 49. Heisler M, Bouknight RR, Hayward RA, Smith DM, Kerr EA. The relative importance of  
547 physician communication, participatory decision making, and patient understanding in diabetes self-  
548 management. *Journal of general internal medicine*. 2002;17(4):243-52.
- 549 50. Mangin D, Stephen G, Bismah V, Risdon C. Making patient values visible in healthcare: A  
550 systematic review of tools to assess patient treatment priorities and preferences in the context of  
551 multimorbidity. *BMJ Open*. 2016;6(6).
- 552 51. Vermunt NP, Harmsen M, Westert GP, Rikkert MGO, Faber MJ. Collaborative goal setting  
553 with elderly patients with chronic disease or multimorbidity: a systematic review. *BMC geriatrics*.  
554 2017;17(1):167.
- 555 52. Boyd CM, Wolff JL, Giovannetti E, Reider L, Weiss C, Xue Q-I, et al. Health care task difficulty  
556 among older adults with multimorbidity. *Medical care*. 2014;52(0 3):S118.
- 557 53. Locke EA, Latham GP. *A theory of goal setting & task performance*: Prentice-Hall, Inc; 1990.
- 558 54. Callahan EJ, Bertakis KD. Development and validation of the Davis Observation Code. *Fam*  
559 *Med*. 1991;23(1):19-24.
- 560 55. Åsenlöf P, Siljebäck K. The patient goal priority questionnaire is moderately reproducible in  
561 people with persistent musculoskeletal pain. *Physical therapy*. 2009;89(11):1226-34.
- 562 56. Melville LL, Baltic TA, Bettcher TW, Nelson DL. Patients' perspectives on the self-identified  
563 goals assessment. *Am J Occup Ther*. 2002;56(6):650-9.
- 564 57. Dedding C, Cardol M, Eysen IC, Dekker J, Beelen A. Validity of the Canadian Occupational  
565 Performance Measure: a client-centred outcome measurement. *Clinical rehabilitation*.  
566 2004;18(6):660-7.
- 567 58. Fried TR, Tinetti M, Agostini J, Iannone L, Towle V. Health outcome prioritization to elicit  
568 preferences of older persons with multiple health conditions. *Patient Educ Couns*. 2011;83(2):278-82.

- 569 59. Steele Gray C, Gill A, Khan AI, Hans PK, Kuluski K, Cott C. The Electronic Patient Reported  
570 Outcome Tool: Testing Usability and Feasibility of a Mobile App and Portal to Support Care for  
571 Patients With Complex Chronic Disease and Disability in Primary Care Settings. *JMIR Mhealth*  
572 *Uhealth*. 2016;4(2):e58.
- 573 60. Toto PE, Skidmore ER, Terhorst L, Rosen J, Weiner DK. Goal Attainment Scaling (GAS) in  
574 geriatric primary care: a feasibility study. *Arch Gerontol Geriatr*. 2015;60(1):16-21.
- 575 61. Glasgow RE, Wagner EH, Schaefer J, Mahoney LD, Reid RJ, Greene SM. Development and  
576 validation of the Patient Assessment of Chronic Illness Care (PACIC). *Med Care*. 2005;43(5):436-44.
- 577 62. Teal CR, Haidet P, Balasubramanyam AS, Rodriguez E, Naik AD. Measuring the quality of  
578 patients' goals and action plans: development and validation of a novel tool. *BMC medical*  
579 *informatics and decision making*. 2012;12:152.
- 580 63. Etz RS, Zyzanski SJ, Gonzalez MM, Reves SR, O'Neal JP, Stange KC. A New Comprehensive  
581 Measure of High-Value Aspects of Primary Care. *Annals of family medicine*. 2019;17(3):221-30.
- 582 64. Adam P, Murphy CF, Dierich M, Hager KD. Seven Years of Teaching Communication With the  
583 Patient-Centered Observation Form. *Fam Med*. 2018;50(2):132-7.
- 584 65. Murdoch J, Salter C, Ford J, Lenaghan E, Shiner A, Steel N. The "unknown territory" of goal-  
585 setting: Negotiating a novel interactional activity within primary care doctor-patient consultations for  
586 patients with multiple chronic conditions. *Soc Sci Med*. 2020;256:113040.
- 587 66. Singh Ospina N, Phillips KA, Rodriguez-Gutierrez R, Castaneda-Guarderas A, Gionfriddo MR,  
588 Branda ME, et al. Eliciting the Patient's Agenda- Secondary Analysis of Recorded Clinical Encounters. *J*  
589 *Gen Intern Med*. 2019;34(1):36-40.
- 590 67. Hersh L, Salzman B, Snyderman D. Health Literacy in Primary Care Practice. *Am Fam*  
591 *Physician*. 2015;92(2):118-24.
- 592 68. Sine DM, Sharpe VA. Ethics, risk, and patient-centered care: how collaboration between  
593 clinical ethicists and risk management leads to respectful patient care. *J Healthc Risk Manag*.  
594 2011;31(1):32-7.
- 595 69. Tinetti ME, Bogardus Jr ST, Agostini JV. Potential pitfalls of disease-specific guidelines for  
596 patients with multiple conditions. *N Engl j Med*. 2004;351(27):2870-4.
- 597 70. Voigt I, Wrede J, Diederichs-Egidi H, Dierks ML, Junius-Walker U. Priority setting in general  
598 practice: health priorities of older patients differ from treatment priorities of their physicians.  
599 *Croatian medical journal*. 2010;51(6):483-92.
- 600 71. Etz R, Stange KC. Measuring what matters in primary care. *Global Advances in Health and*  
601 *Medicine*. 2018;7:263.
- 602 72. Young RA, Roberts RG, Holden RJ. The Challenges of Measuring, Improving, and Reporting  
603 Quality in Primary Care. *Ann Fam Med*. 2017;15(2):175-82.
- 604 73. Lenzen SA, Daniels R, van Bokhoven MA, van der Weijden T, Beurskens A. Development of a  
605 conversation approach for practice nurses aimed at making shared decisions on goals and action  
606 plans with primary care patients. *BMC Health Serv Res*. 2018;18(1):891.

607

608

609

610

611

## 612 **Supporting information**

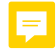

613 **S1 Table 1. Overview preliminary version attributes.**

614 **S2. Table 2. Overview of training**

615

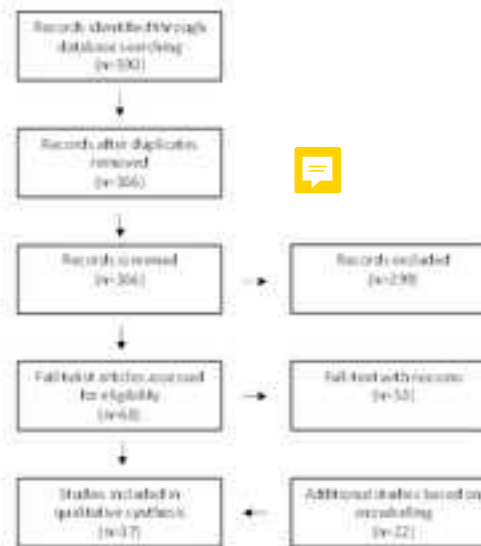

Figure 1 Flow chart demonstrating the search string

Figure 2

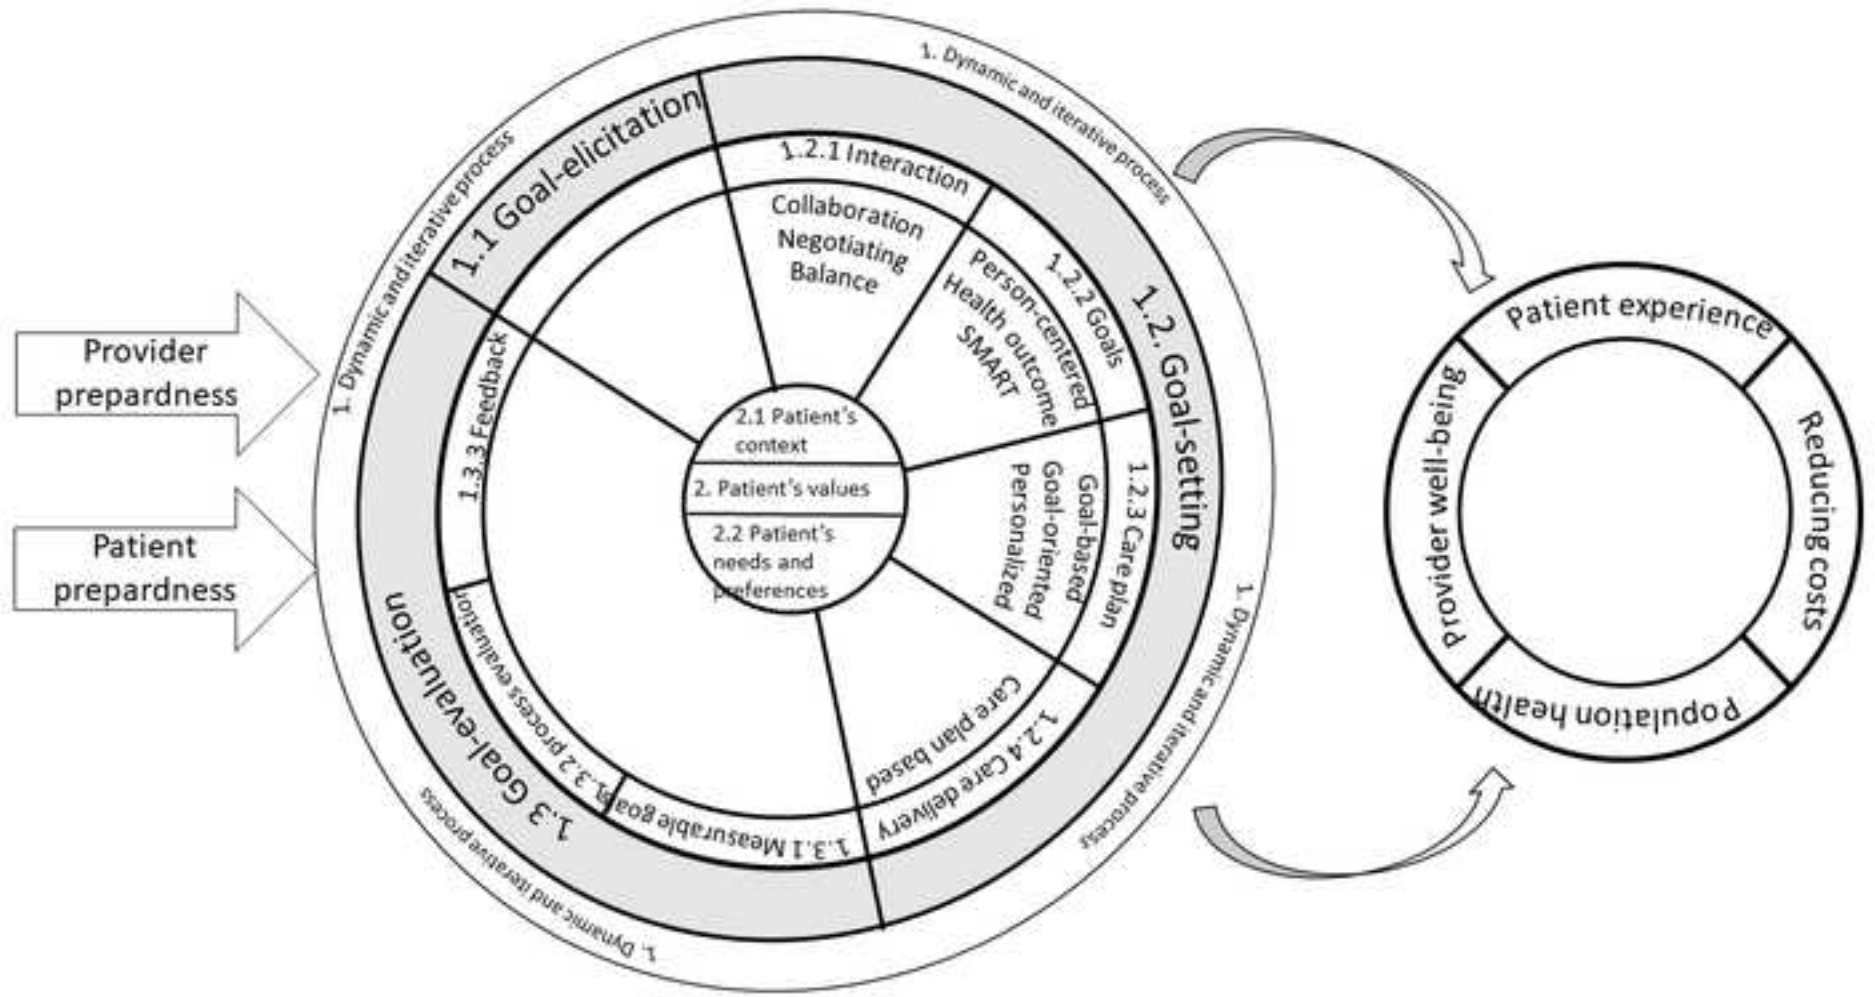

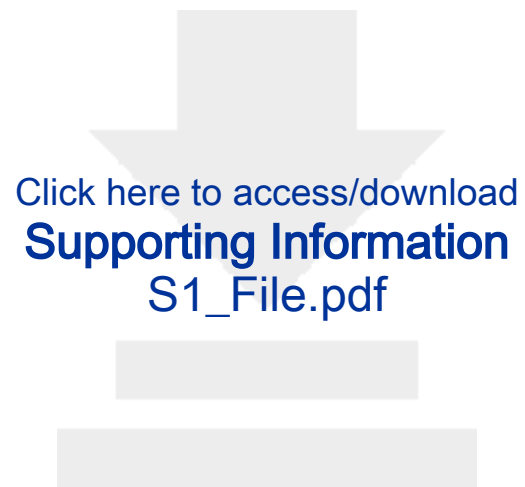

Click here to access/download  
**Supporting Information**  
S1\_File.pdf



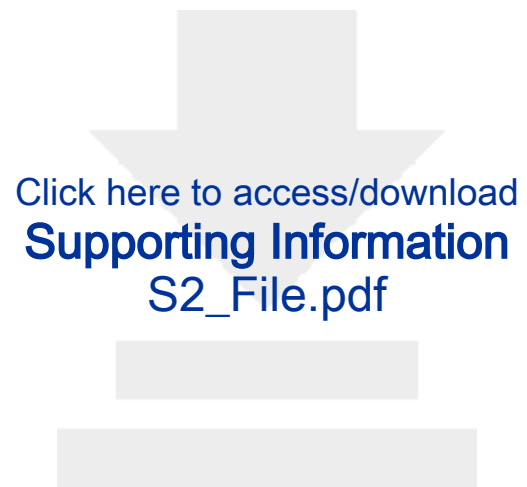

Click here to access/download  
**Supporting Information**  
S2\_File.pdf
