# Supplementary material for: Goal-oriented care for patients with chronic conditions or multimorbidity in primary care: A scoping review and concept analysis
Source: PubMed Central journal article supplement (PMC8815876; doi:10.1371/journal.pone.0262843), 2022-02-04
Supplement: pone.0262843.s006.pdf [file pone.0262843.s006.pdf]

Goal-oriented care for patients with chronic conditions or multimorbidity in primary care: a scoping review and concept analysis

--Manuscript Draft--

|                              |                                                                                                                                                                                                                                                                                                                                                                                                                                                                                                                                                                                                                                                                                                                                                                                                                                                                                                                                                                                                                                                                                                                                                                                                                                                                                                                                                                                                                                                                                                                                                                                                                                                                                                                                                                                                                                                                                                                                                                                                                                                                                                                                                                                                  |
|------------------------------|--------------------------------------------------------------------------------------------------------------------------------------------------------------------------------------------------------------------------------------------------------------------------------------------------------------------------------------------------------------------------------------------------------------------------------------------------------------------------------------------------------------------------------------------------------------------------------------------------------------------------------------------------------------------------------------------------------------------------------------------------------------------------------------------------------------------------------------------------------------------------------------------------------------------------------------------------------------------------------------------------------------------------------------------------------------------------------------------------------------------------------------------------------------------------------------------------------------------------------------------------------------------------------------------------------------------------------------------------------------------------------------------------------------------------------------------------------------------------------------------------------------------------------------------------------------------------------------------------------------------------------------------------------------------------------------------------------------------------------------------------------------------------------------------------------------------------------------------------------------------------------------------------------------------------------------------------------------------------------------------------------------------------------------------------------------------------------------------------------------------------------------------------------------------------------------------------|
| <b>Manuscript Number:</b>    | PONE-D-20-30664R1                                                                                                                                                                                                                                                                                                                                                                                                                                                                                                                                                                                                                                                                                                                                                                                                                                                                                                                                                                                                                                                                                                                                                                                                                                                                                                                                                                                                                                                                                                                                                                                                                                                                                                                                                                                                                                                                                                                                                                                                                                                                                                                                                                                |
| <b>Article Type:</b>         | Research Article                                                                                                                                                                                                                                                                                                                                                                                                                                                                                                                                                                                                                                                                                                                                                                                                                                                                                                                                                                                                                                                                                                                                                                                                                                                                                                                                                                                                                                                                                                                                                                                                                                                                                                                                                                                                                                                                                                                                                                                                                                                                                                                                                                                 |
| <b>Full Title:</b>           | Goal-oriented care for patients with chronic conditions or multimorbidity in primary care: a scoping review and concept analysis                                                                                                                                                                                                                                                                                                                                                                                                                                                                                                                                                                                                                                                                                                                                                                                                                                                                                                                                                                                                                                                                                                                                                                                                                                                                                                                                                                                                                                                                                                                                                                                                                                                                                                                                                                                                                                                                                                                                                                                                                                                                 |
| <b>Short Title:</b>          | Goal-oriented care in primary care                                                                                                                                                                                                                                                                                                                                                                                                                                                                                                                                                                                                                                                                                                                                                                                                                                                                                                                                                                                                                                                                                                                                                                                                                                                                                                                                                                                                                                                                                                                                                                                                                                                                                                                                                                                                                                                                                                                                                                                                                                                                                                                                                               |
| <b>Corresponding Author:</b> | Dagje Boeykens<br>Universiteit Gent Faculteit Geneeskunde en Gezondheidswetenschappen<br>Ghent, BELGIUM                                                                                                                                                                                                                                                                                                                                                                                                                                                                                                                                                                                                                                                                                                                                                                                                                                                                                                                                                                                                                                                                                                                                                                                                                                                                                                                                                                                                                                                                                                                                                                                                                                                                                                                                                                                                                                                                                                                                                                                                                                                                                          |
| <b>Keywords:</b>             | goal-oriented care, goal-setting, patient-centeredness, chronic conditions, multimorbidity, review, concept analysis                                                                                                                                                                                                                                                                                                                                                                                                                                                                                                                                                                                                                                                                                                                                                                                                                                                                                                                                                                                                                                                                                                                                                                                                                                                                                                                                                                                                                                                                                                                                                                                                                                                                                                                                                                                                                                                                                                                                                                                                                                                                             |
| <b>Abstract:</b>             | <p><b>Background</b></p> <p>The healthcare system is faced by an ageing population, increase in chronic conditions and multimorbidity. Multimorbid patients are faced with multiple parallel care processes leading to a risk of fragmented care. These problems relate to the disease-oriented paradigm. In this paradigm the treatment goals can be in contrast with what patients value.</p> <p>The concept of goal-oriented care is proposed as an alternative way of providing care as meeting patients' goals could have potential benefits. Though, there is a need to translate this concept into tangible knowledge so providers can better understand and use the concept in clinical practice. The aim of this study is to address this need by means of a concept analysis.</p> <p><b>Method</b></p> <p>This concept analysis using the method of Walker and Avant is based on a literature search in PubMed, Embase, Cochrane Library, PsychInfo, CINAHL, OTSeeker and Web of Science. The method provides eight iterative steps: select a concept, determine purpose, determine defining attributes, identify model case, identify additional case, identify antecedents and consequences and define empirical referents.</p> <p><b>Results</b></p> <p>The analysis of 37 articles revealed that goal-oriented care is a dynamic and iterative process of three stages: goal-elicitation, goal-setting, and goal-evaluation. The process is underpinned by the patient's context and values. Provider and patient preparedness are required to provide goal-oriented care. Goal-oriented care has the potential to improve patients' experiences and providers' well-being, to reduce costs, and improve the overall population health. The challenge is to identify empirical referents to evaluate the process of goal-oriented care.</p> <p><b>Conclusion</b></p> <p>A common understanding of goal-oriented care is presented. Further research should focus on how and what goals are set by the patient, how this knowledge could be translated into a tangible workflow and should support the development of a strategy to evaluate the goal-oriented process of care.</p> |
| <b>Order of Authors:</b>     | <p>Dagje Boeykens</p> <p>Pauline Boeckxstaens</p> <p>An De Sutter</p> <p>Lies Lahousse</p> <p>Peter Pype</p> <p>Patricia De Vriendt</p>                                                                                                                                                                                                                                                                                                                                                                                                                                                                                                                                                                                                                                                                                                                                                                                                                                                                                                                                                                                                                                                                                                                                                                                                                                                                                                                                                                                                                                                                                                                                                                                                                                                                                                                                                                                                                                                                                                                                                                                                                                                          |

|                                                                                                                                                                                                                                                                                                                                                                                                                                                                                                                                                                                                                                                                                                                                                                                                                                                                                                                                                                                                                                                                                                                                                                                                                                                                                                                                                                                     |                                                                                                                                                                                                                                                                                                                                                                                                                                         |
|-------------------------------------------------------------------------------------------------------------------------------------------------------------------------------------------------------------------------------------------------------------------------------------------------------------------------------------------------------------------------------------------------------------------------------------------------------------------------------------------------------------------------------------------------------------------------------------------------------------------------------------------------------------------------------------------------------------------------------------------------------------------------------------------------------------------------------------------------------------------------------------------------------------------------------------------------------------------------------------------------------------------------------------------------------------------------------------------------------------------------------------------------------------------------------------------------------------------------------------------------------------------------------------------------------------------------------------------------------------------------------------|-----------------------------------------------------------------------------------------------------------------------------------------------------------------------------------------------------------------------------------------------------------------------------------------------------------------------------------------------------------------------------------------------------------------------------------------|
|                                                                                                                                                                                                                                                                                                                                                                                                                                                                                                                                                                                                                                                                                                                                                                                                                                                                                                                                                                                                                                                                                                                                                                                                                                                                                                                                                                                     | Dominique Van de Velde                                                                                                                                                                                                                                                                                                                                                                                                                  |
| <b>Response to Reviewers:</b>                                                                                                                                                                                                                                                                                                                                                                                                                                                                                                                                                                                                                                                                                                                                                                                                                                                                                                                                                                                                                                                                                                                                                                                                                                                                                                                                                       | <p>Dear editor<br/>Dear reviewers</p> <p>We appreciate your extensive and constructive feedback on our manuscript, it added a lot of value.<br/>We aimed to respond to all of your remarks by point to point answers and changes in the manuscript. Please, find the changes in the 'response to the reviewers letter'.<br/>Hopefully they will meet you expectations, otherwise we will make further adjustments.</p> <p>Sincerely</p> |
| <b>Additional Information:</b>                                                                                                                                                                                                                                                                                                                                                                                                                                                                                                                                                                                                                                                                                                                                                                                                                                                                                                                                                                                                                                                                                                                                                                                                                                                                                                                                                      |                                                                                                                                                                                                                                                                                                                                                                                                                                         |
| <b>Question</b>                                                                                                                                                                                                                                                                                                                                                                                                                                                                                                                                                                                                                                                                                                                                                                                                                                                                                                                                                                                                                                                                                                                                                                                                                                                                                                                                                                     | <b>Response</b>                                                                                                                                                                                                                                                                                                                                                                                                                         |
| <p><b>Financial Disclosure</b></p> <p>Enter a financial disclosure statement that describes the sources of funding for the work included in this submission. Review the <a href="#">submission guidelines</a> for detailed requirements. View published research articles from <a href="#">PLOS ONE</a> for specific examples.</p> <p>This statement is required for submission and <b>will appear in the published article</b> if the submission is accepted. Please make sure it is accurate.</p> <p><b>Unfunded studies</b><br/>Enter: <i>The author(s) received no specific funding for this work.</i></p> <p><b>Funded studies</b><br/>Enter a statement with the following details:</p> <ul style="list-style-type: none"> <li>• Initials of the authors who received each award</li> <li>• Grant numbers awarded to each author</li> <li>• The full name of each funder</li> <li>• URL of each funder website</li> <li>• Did the sponsors or funders play any role in the study design, data collection and analysis, decision to publish, or preparation of the manuscript?</li> <li>• <b>NO</b> - Include this sentence at the end of your statement: <i>The funders had no role in study design, data collection and analysis, decision to publish, or preparation of the manuscript.</i></li> <li>• <b>YES</b> - Specify the role(s) played.</li> </ul> <p>* typeset</p> | <p>D.B. is a PhD student payed by the King Baudouin Foundation. Grant number: 2019-J5170820-211588 - King Baudouin Foundation - <a href="https://www.kbs-frb.be/nl/">https://www.kbs-frb.be/nl/</a> - The funders had no role in study design, data collection and analysis, decision to publish, or preparation of the manuscript</p>                                                                                                  |
| <b>Competing Interests</b>                                                                                                                                                                                                                                                                                                                                                                                                                                                                                                                                                                                                                                                                                                                                                                                                                                                                                                                                                                                                                                                                                                                                                                                                                                                                                                                                                          | The authors have declared that no competing interests exist.                                                                                                                                                                                                                                                                                                                                                                            |

Use the instructions below to enter a competing interest statement for this submission. On behalf of all authors, disclose any [competing interests](#) that could be perceived to bias this work—acknowledging all financial support and any other relevant financial or non-financial competing interests.

This statement **will appear in the published article** if the submission is accepted. Please make sure it is accurate. View published research articles from [PLOS ONE](#) for specific examples.

**NO authors have competing interests**

Enter: *The authors have declared that no competing interests exist.*

**Authors with competing interests**

Enter competing interest details beginning with this statement:

*I have read the journal's policy and the authors of this manuscript have the following competing interests: [insert competing interests here]*

\* typeset

**Ethics Statement**

Enter an ethics statement for this submission. This statement is required if the study involved:

- Human participants
- Human specimens or tissue
- Vertebrate animals or cephalopods
- Vertebrate embryos or tissues
- Field research

Write "N/A" if the submission does not require an ethics statement.

General guidance is provided below. Consult the [submission guidelines](#) for

N/A

detailed instructions. **Make sure that all information entered here is included in the Methods section of the manuscript.**

#### Format for specific study types

##### Human Subject Research (involving human participants and/or tissue)

- Give the name of the institutional review board or ethics committee that approved the study
- Include the approval number and/or a statement indicating approval of this research
- Indicate the form of consent obtained (written/oral) or the reason that consent was not obtained (e.g. the data were analyzed anonymously)

##### Animal Research (involving vertebrate animals, embryos or tissues)

- Provide the name of the Institutional Animal Care and Use Committee (IACUC) or other relevant ethics board that reviewed the study protocol, and indicate whether they approved this research or granted a formal waiver of ethical approval
- Include an approval number if one was obtained
- If the study involved *non-human primates*, add *additional details* about animal welfare and steps taken to ameliorate suffering
- If anesthesia, euthanasia, or any kind of animal sacrifice is part of the study, include briefly which substances and/or methods were applied

##### Field Research

Include the following details if this study involves the collection of plant, animal, or other materials from a natural setting:

- Field permit number
- Name of the institution or relevant body that granted permission

##### Data Availability

Authors are required to make all data underlying the findings described fully available, without restriction, and from the time of publication. PLOS allows rare

Yes - all data are fully available without restriction

exceptions to address legal and ethical concerns. See the [PLOS Data Policy](#) and [FAQ](#) for detailed information.

A Data Availability Statement describing where the data can be found is required at submission. Your answers to this question constitute the Data Availability Statement and **will be published in the article**, if accepted.

**Important:** Stating 'data available on request from the author' is not sufficient. If your data are only available upon request, select 'No' for the first question and explain your exceptional situation in the text box.

Do the authors confirm that all data underlying the findings described in their manuscript are fully available without restriction?

**Describe where the data may be found in full sentences. If you are copying our sample text, replace any instances of XXX with the appropriate details.**

All relevant data are within the manuscript and its Supporting Information Files

- If the data are **held or will be held in a public repository**, include URLs, accession numbers or DOIs. If this information will only be available after acceptance, indicate this by ticking the box below. For example: *All XXX files are available from the XXX database (accession number(s) XXX, XXX).*
- If the data are all contained **within the manuscript and/or Supporting Information files**, enter the following: *All relevant data are within the manuscript and its Supporting Information files.*
- If neither of these applies but you are able to provide **details of access elsewhere**, with or without limitations, please do so. For example:

*Data cannot be shared publicly because of [XXX]. Data are available from the XXX Institutional Data Access / Ethics Committee (contact via XXX) for researchers who meet the criteria for*

*access to confidential data.*

*The data underlying the results presented in the study are available from (include the name of the third party and contact information or URL).*

- This text is appropriate if the data are owned by a third party and authors do not have permission to share the data.

\* typeset

Additional data availability information:

# Goal-oriented care for patients with chronic conditions or multimorbidity in primary care: a scoping review and concept analysis.

Dagje Boeykens <sup>12¶\*</sup>, Pauline Boeckxstaens <sup>2¶</sup>, An De Sutter <sup>2</sup>, Lies Lahousse <sup>3</sup>, Peter Pype <sup>245</sup>, Patricia De Vriendt <sup>156&</sup>, Dominique Van de Velde<sup>15&</sup>, on behalf of the Primary Care Academy<sup>^</sup>.

1. Department of Rehabilitation Sciences, Occupational Therapy. Faculty of Medicine and Health Sciences. Ghent University. Ghent. Belgium.
2. Department of Public Health and Primary Care, Faculty of Medicine and Health Sciences. Ghent University. Ghent. Belgium.
3. Department of Bioanalysis, Faculty of Pharmaceutical Sciences, Ghent University. Ghent. Belgium.
4. End-of-Life Care Research Group, Faculty of Medicine and Health Sciences. Vrije Universiteit Brussel and Ghent University. Ghent. Belgium.
5. Department of Occupational Therapy. Artevelde University College. Ghent, Belgium.
6. Frailty in Ageing (FRIA) Research Group, Department of Gerontology and Mental Health and Wellbeing (MENT) research group, Faculty of Medicine and Pharmacy. Vrije Universiteit Brussel. Brussel. Belgium.

\* Corresponding author: [Dagje.boeykens@ugent.be](mailto:Dagje.boeykens@ugent.be)

¶: These authors contributed equally to this work.

&: These authors also contributed equally to this work.

<sup>^</sup>Membership of the Primary Care Academy is provided in the Acknowledgments.

## 24 **Abstract**

### 25 **Background**

26 The healthcare system is faced by an ageing population, increase in chronic conditions and  
27 multimorbidity. Multimorbid patients are faced with multiple parallel care processes leading to a risk  
28 of fragmented care. These problems relate to the disease-oriented paradigm. In this paradigm the  
29 treatment goals can be in contrast with what patients value.

30 The concept of goal-oriented care is proposed as an alternative way of providing care as meeting  
31 patients' goals could have potential benefits. Though, there is a need to translate this concept into  
32 tangible knowledge so providers can better understand and use the concept in clinical practice. The  
33 aim of this study is to address this need by means of a concept analysis.

### 34 **Method**

35 This concept analysis using the method of Walker and Avant is based on a literature search in PubMed,  
36 Embase, Cochrane Library, PsychInfo, CINAHL, OTSeeker and Web of Science. The method provides  
37 eight iterative steps: select a concept, determine purpose, determine defining attributes, identify  
38 model case, identify additional case, identify antecedents and consequences and define empirical  
39 referents.

### 40 **Results**

41 The analysis of 37 articles revealed that goal-oriented care is a dynamic and iterative process of three  
42 stages: goal-elicitation, goal-setting, and goal-evaluation. The process is underpinned by the patient's  
43 context and values. Provider and patient preparedness are required to provide goal-oriented care.  
44 Goal-oriented care has the potential to improve patients' experiences and providers' well-being, to  
45 reduce costs, and improve the overall population health. The challenge is to identify empirical  
46 referents to evaluate the process of goal-oriented care.



47 **Conclusion**

48 A common understanding of goal-oriented care is presented. Further research should focus on how  
49 and what goals are set by the patient, how this knowledge could be translated into a tangible workflow  
50 and should support the development of a strategy to evaluate the goal-oriented process of care.

51 **Keywords**

52 goal-oriented care, goal-setting, patient-centeredness, chronic conditions, multimorbidity, review,  
53 concept analysis

54

55

56

57

58

59

60

61

62

63

64

65

66

67

## 68 Introduction

69 The healthcare system is faced by an ageing population and an increase in chronic conditions and  
70 multimorbidity [1]. More and more people are forced to live with the consequences of these  
71 demographic changes and require ongoing (chronic) care on top of acute care [2]. At the same time,  
72 patient autonomy is gaining importance and patients are considered as an active and important  
73 partner in their care [3, 4]. Patients with chronic conditions are often consulting multiple health care  
74 providers [3] leading to a higher rate of encounters. They also receive a larger amount of prescriptions  
75 [5] and they are asked to complete a diverse set of self-monitoring tasks such as managing,  
76 exacerbations or monitoring biomedical targets [3]. Since patients with (multiple) chronic conditions  
77 are faced with multiple parallel care process for their different conditions, there is a considerable risk  
78 of fragmented care. Especially when healthcare providers focus on disease control, patients can  
79 experience lack of care continuity and issues with communication as patients themselves focus on the  
80 meaning of care and more on personal wellbeing [6, 7]. As a result, treatment goals can be in contrast  
81 with what patients value in their personal lives [3].

82 The healthcare system is oriented towards a disease-oriented paradigm to which many of these  
83 problems relate [8-10]. In this paradigm, care is mainly organized according to disease-oriented  
84 guidelines [10]. This may work well for patients with a single disease, but becomes inappropriate for  
85 patients with multiple problems. The focus on single disease guidelines might distract providers from  
86 what really matters to the patient [10]. A possible way to overcome many of the challenges is to shift  
87 care back from 'what's the matter with the patient' to 'what matters to the patient'. It creates  
88 healthcare processes in which patients' needs are actively sought and met [9]. Meeting those patients'  
89 needs and tailoring care more to what patients want in a co-creation process could result in better  
90 social well-being, physical well-being, and satisfaction for patients and healthcare providers [11].

91 One of the possible strategies is to actively engage patients in identifying their personal goals and  
92 aligning care to those goals, which could be achieved by goal-oriented care [12]. The concept of goal-

93 oriented care has been launched and mentioned for the first time in 1991 by Mold who proposed the  
94 concept as an alternative way of providing care [13]. Later on, in 2012, Reuben and Tinetti took the  
95 concept of goal-oriented care a step forward by stating that care “must above all consider patients’  
96 preferred outcomes” [10]. The focus on setting goals based on the patients’ needs and preferences  
97 rather than on health-related outcomes became one of the main novelties in chronic disease  
98 management [4]. Not only could goal-oriented care be proposed as an important paradigm to  
99 overcome some of the new challenges for chronic patients [9], it might also corresponded to the  
100 original concept of evidence based medicine (EBM) [14]. EBM was first published by Sackett in 1996  
101 who described three key components: 1. best external evidence, 2. individual clinical expertise, and 3.  
102 patients’ values and expectations [14]. Since the first description of EBM, multiple approaches and  
103 paradigms has been developed to compromise between those three components [15]. For example,  
104 patient-centered care (PCC), which is already a well-known and widely used concept, is defined as  
105 “providing care that is respectful of, and responsive to individual patient preferences, needs, and  
106 values and ensuring that patients values guide all clinical decisions” [15]. Shared-decision making, on  
107 the other hand, also strives to share evidence and engage patients in care as it is “an approach where  
108 clinicians and patients share the best available evidence when faced with the task of making decisions,  
109 and where patients are supported to consider options, and to achieve informed preferences” [16].  
110 Goal-oriented care is proposed as a promising healthcare paradigm and approach to operationalize  
111 EBM and return to where it all started [10]. However, in contrast to the other approaches and  
112 paradigms, goal-oriented care is ill defined. Developing a common understanding on the concept could  
113 potentially contribute to the clarification and in-depth comparison between the related concepts and  
114 eventually lead to better use in clinical practice. However, some healthcare providers might already  
115 assume that they practice goal-oriented care spontaneously, but there still is a lack of underpinning  
116 knowledge and guidance on how to provide goal-oriented care to patients. The main pitfall in most of  
117 these goal-setting activities is that the goals are not necessarily related to the patients’ needs and  
118 preferences while in goal-oriented care these patients’ needs and preferences are put on the forefront

119 and are not necessarily health-related. [17, 18]. From this perspective, goal-setting and goal-oriented  
120 care should be taken together and focus on the patients' needs and preferences.

121 As a first step in exploring the potential of goal-oriented care in chronic care, it is important to gain in-  
122 depth knowledge on what goal-oriented care is about and how it can be generally described.

123 As goal-oriented care could be well-suited in primary care, as this context is often the linchpin for  
124 patients with chronic conditions, this will be the focus of this study [19]. This study aimed to describe  
125 a structured approach to deepen the concept of goal-oriented care for patients with chronic conditions  
126 or multimorbidity in the primary care context.

## 127 **Method**

128 This concept analysis aims to present an overview and synthetization of the existing literature  
129 regarding goal-oriented care for chronically ill patients in primary care. This will be performed by  
130 analyzing the concept into antecedents, attributes, and consequences following the method of Walker  
131 and Avant [25]. This method provides a framework of eight iterative steps: 1. select a concept, 2.  
132 determine the aims or purposes of analysis, 3. identify all concept definitions and select the literature,  
133 4. determine different attributes, 5. identify a model case, 6. identify an additional case, 7. identify  
134 antecedents and consequences, and 8. define empirical referents [25]. In this concept analysis the  
135 attributes are the heart and will present the characteristics of goal-oriented care and allow the  
136 broadest insight into the concept [25].

### 137 **Step 1: select a concept**

138 Goal-oriented care has been defined as an underpinning strategy for primary care reform in Flanders,  
139 Belgium. The concept is presented as one of the main topics of 'The Primary Care Academy' (PCA). The  
140 PCA is a consortium consisting of four universities (Ghent University, University of Antwerp, Catholic  
141 university of Leuven, Vrije Universiteit of Brussels), six universities of applied sciences (UAC VIVES, UAC

142 Artevelde, UAC Ghent, UAC Leuven-Limburg, UAC Karel de Grote, UAC Thomas More), and important  
143 stakeholders (Flemish Patient Platform and White-Yellow Cross; a home care organization) in Belgium  
144 with the aim to strengthen the primary care organization and delivery. The PCA includes experts in  
145 primary care from a variety of healthcare and welfare disciplines. Discussions in the research group  
146 working on goal-oriented care created a necessity to clarify the concept.

## 147 **Step 2: determine the aims and purposes of the analysis**

148 The aim of this concept analysis is to build a common understanding to eliminate ambiguity between  
149 the concepts related to goal-oriented care. Specifically, the scope of the concept analysis is to define  
150 goal-oriented care for people with chronic conditions at the level of primary care.

## 151 **Step 3: select the literature**

152 The literature search was conducted between January 2020 and April 2020. As the method of a concept  
153 analysis does not specify how the literature search has to be performed, this search was based on the  
154 method of a scoping review described by Levac (2010) [26]. A preliminary combination of search terms  
155 was identified: 'goal-oriented care', 'chronic care', and 'primary care'. Based on these keywords a first  
156 search was performed to identify adjacent terms in the literature. The search strategy was revised in  
157 consultation with the librarian of the university and the senior researchers. The definitive keywords  
158 were: 'goal-oriented care', 'goal-oriented medical care', 'person-centered goal-setting', 'patient-  
159 centered goal-setting', 'goal-oriented patient care', and 'patient priorities', emphasized goal-oriented  
160 care and its synonyms. Related concepts such as patient-centered care, value-based care, etc. were not  
161 included as the method of concept analysis prescribes to deepen all the attributes of one concept. In  
162 a first phase, the keywords were entered in PubMed, Embase, and Cochrane Library (Table 1). In a  
163 second phase, CINAHL, OTSeeker, PsycINFO, and Web of Science were consulted and confirmed the  
164 first results as no new studies were identified

165

Table 1. Overview of the search strings.

|     |                                                                                                   |
|-----|---------------------------------------------------------------------------------------------------|
| 166 | <b>PubMed</b>                                                                                     |
| 167 | (goal-directed care[MeSH Terms]) OR goal-oriented care [Title/abstract]) OR goal-oriented         |
| 168 | medical care [Title/abstract]) OR person-centered goal-setting [Title/abstract]) OR patient       |
| 169 | centered goal-setting [Title/abstract]) OR goal-oriented patient care[Title/abstract]) OR patient |
| 170 | priorities [Title/abstract])                                                                      |
| 171 | <b>Embase</b>                                                                                     |
| 172 | 'goal-oriented care':ab,ti OR 'goal-oriented medical care':ab,ti OR 'person-centered goal-        |
| 173 | setting':ab,ti OR 'patient centered goal-setting':ab,ti OR 'goal-oriented patient care': ab,ti OR |
| 174 | 'patient priorities':ab,ti                                                                        |
| 175 | <b>Cochrane</b>                                                                                   |
| 176 | goal-oriented care in Title Abstract Keyword OR goal-oriented medical care in Title Abstract      |
| 177 | Keyword OR person-centered goal-setting in Title Abstract Keyword OR patient-centered goal-       |
|     | setting in Title Abstract Keyword OR goal-oriented patient care OR patient priorities in Title    |
|     | Abstract Keyword - (Word variations have been searched)                                           |

178 Articles resulting from this search were put in Rayyan [27] to administer the data. A first selection  
179 based on title and abstract was performed with regard to the predefined in- and exclusion criteria.  
180 Inclusion criteria: (a) goal-oriented care as a health-related concept, (b) mentioning goal-setting, goal-  
181 oriented care or related concept (e.g. person-centered integrated care), and (c) focusing on patients  
182 with one or more chronic conditions . Exclusion criteria: (a) focusing on single-disease management,  
183 (b) goals regarding disease-specific outcomes (e.g. cancer or diabetes), (c) focusing on goal-oriented  
184 care in a specific context (e.g. rehabilitation center), and (d) specifically mentioning patient-centered  
185 care, shared-decision making, etc. as they will hamper the understanding of specifically goal-oriented  
186 care. Articles resulting from this first search were subjected to a full text screening based on the initial  
187 criteria and: (a) full text available, (b) written in English, (c) referring to goal-oriented care or related

188 concepts as a concept, and (d) containing information of a theoretical building of a definition. There  
189 was no restriction by study design to gain as much insight in goal-oriented care from different data  
190 sources.

#### 191 **Step 4: defining the attributes**

192 The determination of the attributes started with a discussion of four key articles [1, 6, 28, 29] selected  
193 by the first author based on the divers approaches of goal-oriented care and presented to the research  
194 group. Similar to a qualitative, thematic analysis, the key articles were analyzed based on an open  
195 coding and then grouped into codes (Table 2 – example of data analysis). These codes were then  
196 presented to and discussed with the co-authors. In these discussion rounds, codes were translated into  
197 attributes. In a second phase, new articles were added and analyzed based on the same method as the  
198 key articles until all relevant literature (based on the inclusion criteria) was included. The different  
199 codes were put into NVIVO12 to synthesize the data and to initiate further discussion with the research  
200 group. This resulted in the final attributes (Table 4). The method starting from reading the first article  
201 to defining the attributes was characterized by an iterative process in which the attributes were  
202 reformulated until consensus with the research group was reached.

203

204

205

206

207

208

209

210 *Table 2. Example of analysis process of the study of Bernsten et al. 2018.*

| <b>Extract from article</b>                                                                                                                                                                     | <b>Code</b>                                           | <b>Attribute</b>                             |
|-------------------------------------------------------------------------------------------------------------------------------------------------------------------------------------------------|-------------------------------------------------------|----------------------------------------------|
| ...A professional and a personal goal clashes in a decision process regarding the discontinuation of a medication the informant had been using for years...                                     | Negotiation goals between professionals and patients. | Goal-setting – patient-provider interaction  |
| ... However “What matters to you?” gave a richer and more immediate insight into areas threatened by health issues...                                                                           | Patient centeredness                                  | Tailoring to patients’ needs and preferences |
| ...Goal evaluation serves as feedback to all contributors in the seamless care process... The result should be documented and linked back to goal adjustment and learning for the next cycle... | Feedback to the care process                          | Goal-evaluation                              |

211

## 212 **Step 5: identify a model case, a contrary case, and a borderline case**

213 A model case is presented as a narrative of how goal-oriented care could be conceptualized and  
214 illustrates all defined attributes of goal-oriented care [25]. A contrary and borderline case differ from  
215 this model case and do not include all of the attributes and/or differ in one of them.

## 216 **Step 6: identify antecedents and consequences**

217 Antecedents are events or incidents that precede the process of applying goal-oriented care.  
218 Consequences are those events or incidents as a result of applying goal-oriented care [25].  
219 The antecedents and consequences were searched simultaneously with the attributes (step 4). Results  
220 have been discussed by the entire research group until consensus was reached.

221

222



## 223 **Step 7: define empirical referents**

224 Empirical referents provide an overview of the identified assessment tools related to the attributes  
225 aiming to make the concept, goal-oriented care, measurable. These assessment tools may be seen as  
226 the underpinning needs and characteristics when developing an evaluation method of goal-oriented  
227 care.

## 228 **Results**

### 229 **Step 1-3**

230 A first search based on the predefined terms (Table 1) resulted in 590 articles; 82 from Cochrane  
231 Library, 188 from Embase, and 313 from PubMed. After removing the duplicates, 366 articles were  
232 screened by title and abstract yielding 68 articles. A full text screening of these 68 articles lead to 15  
233 articles that fitted the predefined in- and exclusion criteria (step 3). Based on the snowballing method  
234 of adding new articles based on references, citations, and similar articles 22 additional articles were  
235 added. This resulted in a total of 37 articles (Fig. 1 and Table 3) that were selected for the full text  
236 analysis. These articles represented a broad range of study types: 4 systematic reviews, 4 experimental  
237 studies (e.g. randomized controlled trial), 13 qualitative studies, 3 survey studies, 1 concept analysis,  
238 1 methodology paper, 4 reviews, 2 position papers, 1 background paper, 1 status report, 1  
239 commentary, 1 opinion paper, and 1 perspective.

240

241

242

243

*Fig. 1 Flow chart demonstrating the search string.*

245

246

247

248

| <b>Papers identified based on full text screening</b> |      |                                                                              |                                                                                                                                                                                                                                      |                                                                                                                                                                                                                                                                                                                                                                                                                        |
|-------------------------------------------------------|------|------------------------------------------------------------------------------|--------------------------------------------------------------------------------------------------------------------------------------------------------------------------------------------------------------------------------------|------------------------------------------------------------------------------------------------------------------------------------------------------------------------------------------------------------------------------------------------------------------------------------------------------------------------------------------------------------------------------------------------------------------------|
| No.                                                   | Year | Authors                                                                      | Title                                                                                                                                                                                                                                | Study design + method                                                                                                                                                                                                                                                                                                                                                                                                  |
| 1                                                     | 1991 | Mold, Blake, Lorne, Becker [13]                                              | Goal-oriented medical care.                                                                                                                                                                                                          | Position paper                                                                                                                                                                                                                                                                                                                                                                                                         |
| 2                                                     | 2011 | De Maeseneer, Boeckxstaens [30]                                              | Care for non-communicable diseases (NCD's): time for a paradigm-shift.                                                                                                                                                               | Opinion paper                                                                                                                                                                                                                                                                                                                                                                                                          |
| 3                                                     | 2012 | Reuben, Tinetti [10]                                                         | Goal-oriented patient care- an alternative health outcomes paradigm.                                                                                                                                                                 | Perspective                                                                                                                                                                                                                                                                                                                                                                                                            |
| 4                                                     | 2014 | Bayliss, Bonds, Boyd, Davis, Finke, Fox, Stange [31]                         | Understanding the context of health for persons with multiple chronic conditions: moving from what is the matter to what matters.                                                                                                    | Forty-five experts met to critically consider four aspects of incorporating context into research on multiple chronic conditions.                                                                                                                                                                                                                                                                                      |
| 5                                                     | 2014 | Kramer, Bauer, Dicker, Durusu-Tranriover, Ferreira, Rigby, van Hulsteijn [8] | The changing face of internal medicine: patient- centered care.                                                                                                                                                                      | Position paper                                                                                                                                                                                                                                                                                                                                                                                                         |
| 6                                                     | 2015 | Bernsten, Gammon, Steinsbekk, Salamonsen, Foss, Ruland, Fonnebo [32]         | How do we deal with multiple goals for care within an individual patient trajectory? A document content analysis of health service research papers on goals for care.                                                                | Document content analysis of seventy health service research papers on the topic of 'goals of care'.                                                                                                                                                                                                                                                                                                                   |
| 7                                                     | 2016 | Blom, Elzen, Houwelingen, Heijmans, Stijnen, Van Den Hout, Gussekloo [33]    | Effectiveness and cost-effectiveness of a proactive, goal-oriented, integrated care model in general practice for older people. A cluster randomized controlled trial: integrated systematic care for older people-the ISCOPE study. | Cluster randomized controlled trial –intervention group: general practitioners made an integrated care plan using functional geriatric approach; control group: care as usual; 59 general practices were included (30 intervention, 29 control); outcome measures on quality of life, activities of daily living, satisfaction with delivered healthcare, and cost-effectiveness of the intervention 1-year follow-up. |

|    |      |                                                                            |                                                                                                                                                                      |                                                                                                                                                                                                                                                                                                            |
|----|------|----------------------------------------------------------------------------|----------------------------------------------------------------------------------------------------------------------------------------------------------------------|------------------------------------------------------------------------------------------------------------------------------------------------------------------------------------------------------------------------------------------------------------------------------------------------------------|
| 8  | 2016 | Boeckstaens, Willems, Lanssens, Decuypere, Brusselle, Kühlein, Sutter [34] | A qualitative interpretation of challenges associated with helping patients with multiple chronic diseases identify their goals.                                     | Qualitative research – qualitative interviews with nineteen patients diagnosed with chronic, obstructive pulmonary disease and comorbidities to explore goal-setting in patients with multimorbidity.                                                                                                      |
| 9  | 2016 | Mangin, Stephen, Bismah, Risdon [35]                                       | Making patient values visible in healthcare: a systematic review of tools to assess patient treatment priorities and preferences in the context of multimorbidity.   | Systematic review – data sources: Medline, Embase, Cochrane databases; citations were included if they reported a tool to use a record patient priorities or preferences for treatment, and quantitative or qualitative results following administration of the tool.                                      |
| 10 | 2016 | Schmidt, Babac, Pauer, Damm, von der Schulenberg [36]                      | Measuring patients priorities using the Analytic hierarchy process in comparison with best-worst scaling and rating cards: methodological aspects and ranking tasks. | Analysis of the results of non-standardized Analytic Hierarchy Process (AHP) for different consistency ration threshold, aggregation methods, and sensitivity analysis; comparison of rankings criteria of AHP with best-worst-scaling and ranking cards results by Kendall's tau b.                       |
| 11 | 2016 | Tinetti, Esterson, Ferris, Posner, Blaum [1]                               | Patient priority-directed decision making and care for older adults with multiple chronic conditions.                                                                | Review                                                                                                                                                                                                                                                                                                     |
| 12 | 2018 | Bernsten, Hoyem, Lettrem, Rul, Rumpsfeld, Gammon [6]                       | A person-centered integrated care quality framework, based on qualitative study of patient's evaluation of care in light of chronic care ideals.                     | Qualitative evaluative review of the individual patient pathways experiences of nineteen strategically chosen persons with multimorbidity.                                                                                                                                                                 |
| 13 | 2019 | Feder, Kiwak, Costello, Dindo, Hern, Bigos, Naik [3]                       | Perspective of patients in identifying their values-based health priorities.                                                                                         | Qualitative study using in-depth semi structured telephone and in-person interviews; open-ended questions about patient perceptions of the patient health priorities identification process, perceived benefits of the process, enablers and barriers to PHPI, and recommendation for process enhancement. |
| 14 | 2019 | Franklin, Lewis, Willis, Roger,                                            | Controlled, constrained or flexible? How self-management goals are shaped by patient-provider interactions.                                                          | Conversation analysis; observations of consultations for chronic care management between patients and their health professionals.                                                                                                                                                                          |

|                                       |      | Venville, Smith [37]                                                   |                                                                                                                                     |                                                                                                                                                                                                                                                                                                                                                                                                                                                                               |
|---------------------------------------|------|------------------------------------------------------------------------|-------------------------------------------------------------------------------------------------------------------------------------|-------------------------------------------------------------------------------------------------------------------------------------------------------------------------------------------------------------------------------------------------------------------------------------------------------------------------------------------------------------------------------------------------------------------------------------------------------------------------------|
| 15                                    | 2019 | Tinetti, Dindo, Smith, Blaum, Costello, Ouellet, Naik [38]             | Challenges and strategies in patient's health priorities-aligned decision-making for older adults with multiple chronic conditions. | Participant observation qualitative study – clinicians followed a training and had experiences in providing patient priorities care (PPC), clinicians and PPC implementation team participated in 21 case-based, group discussions. Using emergent learning, participants discussed challenges, posed solutions, and worked together to determine how to align care options with the health priorities of 35 patients participating in the patient priorities care pilot.     |
| Papers identified through snowballing |      |                                                                        |                                                                                                                                     |                                                                                                                                                                                                                                                                                                                                                                                                                                                                               |
| No.                                   | Year | Authors                                                                | Title                                                                                                                               | Study design                                                                                                                                                                                                                                                                                                                                                                                                                                                                  |
| 16                                    | 2006 | Hurn, Kneebone, Cropley [39]                                           | Goal setting as an outcome measure: a systematic review                                                                             | Systematic review – data sources included a computer-aid literature search of studies examining the reliability, validity, and sensitivity of goal-setting/ goal-attainment scaling, with snowballing.                                                                                                                                                                                                                                                                        |
| 17                                    | 2009 | Bodenheimer, Handley [40]                                              | Goal-setting for behavior change in primary care: an exploration and status report.                                                 | Exploration and Status report – literature search on goal-setting interventions for promoting behavior change; resulting in eight articles.                                                                                                                                                                                                                                                                                                                                   |
| 18                                    | 2011 | Junius-Walker, Stolberg, Steinke, Theile, Hummers-Pradier, Dierks [41] | Health and treatment priorities of older patients and their general practitioners: a cross-sectional study.                         | Cross-sectional study – 123 older patients and 11 general practitioners evaluated the importance and severity of patients' individual health problems. Patients received a geriatric assessment, then GPS rated the importance and components of severity of each problem; assessing proportion of important problems and the chance corrected agreement; multilevel logistic regression models were used to relate the importance of a problem with its severity components. |

|    |      |                                                                                   |                                                                                                                                                                                                                                                  |                                                                                                                                                                                                                                                                                               |
|----|------|-----------------------------------------------------------------------------------|--------------------------------------------------------------------------------------------------------------------------------------------------------------------------------------------------------------------------------------------------|-----------------------------------------------------------------------------------------------------------------------------------------------------------------------------------------------------------------------------------------------------------------------------------------------|
| 19 | 2012 | Rijken, Bekkema, Boeckxstaens, Schellevis, De Maeseneer, Groenewegen [2]          | Chronic disease management programs: an adequate response to patients' needs?                                                                                                                                                                    | Survey among country-experts resulting in information about existing disease management programs; in addition scientific literature.                                                                                                                                                          |
| 20 | 2014 | Lenzen, Daniëls, van Bokhoven, der Weijden, Beurskens [42]                        | Setting goals in chronic care: shared decision making as self-management support by the family physician.                                                                                                                                        | Background paper to contribute to the understanding of goal-setting within self-management and to identify elements that need further development for practical use.                                                                                                                          |
| 21 | 2016 | Steel Gray, Wodchis, Upshur, Cott, McKinstry, Mercer, Palen, Ramsay, Thavorn [43] | Supporting goal-oriented primary health care for seniors with complex care needs using mobile technology: evaluation and implementation of the health system performance research network, Bridgepoint electronic patient reported outcome tool. | Pragmatic cluster randomized controlled trial – intervention groups using ePRO tool compared with control groups on measure of quality of life, patient experience, and cost-effectiveness; evaluating of tool.                                                                               |
| 22 | 2017 | Kangovi, Mitra, Smith, Kulkarni, Turr, Huo, Glanz, Grande, Long [44]              | Decision-making and goal-setting in chronic disease management: baseline findings of a randomized controlled trial.                                                                                                                              | Randomized controlled trial – patients used low-literacy aid to prioritize one of their chronic conditions and then set a goal for that condition with their primary care provider; patients created patient-driven action plans for reaching these goals.                                    |
| 23 | 2017 | Mold [45]                                                                         | Goal-directed health care: redefining health and health care in the era of value-based care.                                                                                                                                                     | Review                                                                                                                                                                                                                                                                                        |
| 24 | 2017 | Schellinger, Anderson, Frazer, Cain [46]                                          | Patient self-defined goals: essentials of person-centered care for serious illness.                                                                                                                                                              | Descriptive qualitative analysis – initial inquiry to describe self-defined goals patients living with advanced heart failure, cancer, and dementia; goals were entered in electronic health record flow sheet using patients' quotes; analysis of 160 flow sheets with a deductive approach. |
| 25 | 2017 | Vermunt, Harmsen, Elwyn, Westert, Burgers, Rikkert, Faber [47]                    | A three-goal model for patients with multimorbidity: a qualitative approach.                                                                                                                                                                     | Qualitative study – qualitative interviews with general practitioners and clinical geriatricians and analyzed following a thematic approach.                                                                                                                                                  |

|    |      |                                                                                              |                                                                                                               |                                                                                                                                                                                                                                                                                                                                                                                                                                                                                                                                                                                                                                                                                                                                                                                                                                    |
|----|------|----------------------------------------------------------------------------------------------|---------------------------------------------------------------------------------------------------------------|------------------------------------------------------------------------------------------------------------------------------------------------------------------------------------------------------------------------------------------------------------------------------------------------------------------------------------------------------------------------------------------------------------------------------------------------------------------------------------------------------------------------------------------------------------------------------------------------------------------------------------------------------------------------------------------------------------------------------------------------------------------------------------------------------------------------------------|
| 26 | 2017 | Vermunt, Harmsen, Westert, Rikkert, Faber [17]                                               | Collaborative goal setting with elderly patients with chronic disease or multimorbidity: a systematic review. | Systematic review based on EPOC, PRISMA and MOOSE guidelines; Pubmed, PsychInfo, CINAHL, Web of Science, Embase, Cochrane Central Register of Controlled Trials were searched systematically; eligibility criteria: 1) Randomized (cluster) controlled trials, non-randomized controlled trials, controlled before-after studies, interrupted time series or repeated measures study design; 2) Single intervention directed specifically at collaborative goal setting or health priority setting or a multifactorial intervention including these elements; 3) Study population of patients with multimorbidity or at least one chronic disease (mean age $\pm$ standard deviation (SD) incl. age 65). 4) Studies reporting on outcome measures reducible to outcomes for collaborative goal setting or health priority setting. |
| 27 | 2018 | Kessler, Walker, Sauv -Schenk, Egan [29]                                                     | Goal setting dynamics that facilitate or impede a client-centered approach.                                   | Conversation analysis on goal-setting conversations; purposively selected from a pilot randomized controlled trial of OPC-stroke                                                                                                                                                                                                                                                                                                                                                                                                                                                                                                                                                                                                                                                                                                   |
| 28 | 2018 | Naik, Dindo, Van Liew, Hundt, Vo, Hernandez-Bigos, Esterson, Geda, Rosen, Blaum, Tinetti [4] | Development of a clinically feasible process for identifying individual health priorities.                    | Prospective development and feasibility study – development team of patients, caregivers, clinicians using a user-centered design to develop and refine value-based patient priorities care process and medical record template; descriptive statistics and qualitative analysis of barriers and enablers.                                                                                                                                                                                                                                                                                                                                                                                                                                                                                                                         |
| 29 | 2019 | De Groot, Sch nrock-Adema, Zwart, Damoiseaux, Jaarsma, Mol, Bombeke [48]                     | Learning from patients about patient-centeredness: a realist review: BEME guide No.60                         | Realist review – realist review approach; literature search in scoping phase, deductive and inductive coding to extent rough program theory.                                                                                                                                                                                                                                                                                                                                                                                                                                                                                                                                                                                                                                                                                       |

|    |      |                                                                                                               |                                                                                                                                                                        |                                                                                                                                                                                                                                                                                                                                                                              |
|----|------|---------------------------------------------------------------------------------------------------------------|------------------------------------------------------------------------------------------------------------------------------------------------------------------------|------------------------------------------------------------------------------------------------------------------------------------------------------------------------------------------------------------------------------------------------------------------------------------------------------------------------------------------------------------------------------|
| 30 | 2019 | Kuluski, Guilcher [49]                                                                                        | Towards a person-centred learning health system: understanding value from the perspectives of patients and caregivers.                                                 | Commentary; call to action to combine the tenets from person-centered care, value-based healthcare, and learning health systems.                                                                                                                                                                                                                                             |
| 31 | 2019 | Kuluski, Peckham, Gill, Gagnon, Wong-Cornall, McKillop, Parsons, Sheridan [9]                                 | What is important to older people with multimorbidity and their caregivers? Identifying attributes of person centered care from the user perspective.                  | Qualitative descriptive study; 1-1 interviews semi-structured interviews with 172 patients and caregivers from 9 community based primary healthcare.                                                                                                                                                                                                                         |
| 32 | 2019 | Reuben, Jennings [12]                                                                                         | Putting goal-oriented patient care into practice.                                                                                                                      | Review                                                                                                                                                                                                                                                                                                                                                                       |
| 33 | 2019 | Salter, Shiner, Lenaghan, Murdoch, Ford, Winterburn, Steel [28]                                               | Setting goals with patients living with multimorbidity: qualitative analysis of general practice consultations.                                                        | Qualitative analysis of general practice consultations – analysis of video recorded doctor-patient interactions; focus groups to identify core challenges of goal-setting.                                                                                                                                                                                                   |
| 34 | 2019 | Tinetti, Naik, Dindo, Costello, Esterson, Geda, Rosen, Hernandez-Bigos, Smith, Ouellet, Kang, Lee, Blaum [50] | Association of patient priorities-aligned decision-making with patient outcomes and ambulatory health care burden among older adults with multiple chronic conditions. | Nonrandomized clinical trial with propensity adjustment conducted at one patient priorities care (PPC) and one usual care; participants included 163 adults aged 65 years or older who had three or more chronic conditions care for by ten primary care practitioners (PCP) trained in PPC and 203 similar patients who received usual care from 7 PCPs not trained in PPC. |
| 35 | 2020 | Eckhoff, Weiss [51]                                                                                           | Goal-setting: a concept analysis                                                                                                                                       | Concept analysis – method of Walker and Avant, articles and book chapters were reviewed from Cumulative Index to Nursing and Allied Health Literature, Education Resources Information Center, Psych Index.                                                                                                                                                                  |
| 36 | 2020 | Purkale, Nagyaldi, Todd, Mold [52]                                                                            | Physician's response to patient's quality-of-life goals.                                                                                                               | Randomized controlled trial – patients were given a previsit questionnaire that included quality of life questions; physicians in the control were given no further prompting; intervention physicians were prompted to ask quality of life questions; a two-                                                                                                                |



|    |      |                                                                        |                                                                                                                                          |                                                                                                                                                                                                                                                                                                                                                                                                                         |
|----|------|------------------------------------------------------------------------|------------------------------------------------------------------------------------------------------------------------------------------|-------------------------------------------------------------------------------------------------------------------------------------------------------------------------------------------------------------------------------------------------------------------------------------------------------------------------------------------------------------------------------------------------------------------------|
|    |      |                                                                        |                                                                                                                                          | pronged design was used: prepost group where three physicians participated in 5 control and 5 intervention encounters (n = 30) and a randomized group in which 11 physicians and their patients were randomly assigned to control or intervention groups (n = 30). Video recordings of the encounters were reviewed to determine if QOL goals were mentioned and if they were utilized in decision making.              |
| 37 | 2020 | Sathanpally, Sidhu, Fahami, Gillies, Kadam, Davies, Khunti, Seidu [53] | Priorities of patients with multimorbidity and of clinicians regarding treatment and health outcomes: a systematic mixed studies review. | Systematic review – MEDLINE, EMBASE, CINAHL, and Cochrane databases were searched; included studies reported health outcome and treatment priorities of adults with multimorbidity, defined as suffering from two or more chronic conditions, or of clinicians in the context of multimorbidity or both; no restriction by study design, and studies using quantitative and/or qualitative methodologies were included. |

250

251

252

253

254

255

256

257 **Step 4: attributes**

258 The systematic analysis of the 37 selected papers could identify many different attributes of goal-  
 259 oriented care (S1 Table 1). Synthesizing these attributes, goal-oriented care could be described as a  
 260 multifaceted dynamic and iterative process of care (first main attribute) underpinned by patients’  
 261 values (second main attribute). For the process of goal-oriented care five sub attributes and seven  
 262 descriptive items could be identified (Table 4). These attributes interact and cannot be interpreted  
 263 separately.

264 *Table 4. Overview of attributes.*

|                                                                                                                               |                                                                                                |                                                                                                                                                      |
|-------------------------------------------------------------------------------------------------------------------------------|------------------------------------------------------------------------------------------------|------------------------------------------------------------------------------------------------------------------------------------------------------|
| Goal-oriented care is a multifaceted, dynamic and iterative process. [1, 3, 4, 6, 12, 13, 17, 28, 29, 40, 42, 43, 46, 54, 55] | 1.1 Goal-elicitation builds a patient-provider relationship. [1, 28, 29, 45, 56]               |                                                                                                                                                      |
|                                                                                                                               | 1.2 Goal-oriented care entails goal-setting.                                                   | 1.2.1 Patient-provider interaction guides goal-setting. [2, 4, 12, 13, 17, 28, 29, 35, 40, 42-45, 47, 49]                                            |
|                                                                                                                               |                                                                                                | 1.2.2 Patients’ needs and preferences are the foundation of SMART formulated goals. [1-4, 6, 10, 13, 28, 29, 31, 35, 37, 41, 44, 46, 49, 50, 56, 57] |
|                                                                                                                               |                                                                                                | 1.2.3 Care plan is based on patients’ needs and preferences. [1, 3, 4, 6, 10, 12, 13, 17, 31, 33, 35, 38]                                            |
|                                                                                                                               |                                                                                                | 1.2.4 Care is delivered according to the care plan. [1, 6]                                                                                           |
|                                                                                                                               | 1.3 Goal-evaluation is a reflexive process.                                                    | 1.3.1 Feedback should be given to the goals. [38, 54]                                                                                                |
|                                                                                                                               |                                                                                                | 1.3.2 Evaluation entails questioning how goals are being met. [12]                                                                                   |
| 1.3.3 Goals must be measurable. [13], 33)                                                                                     |                                                                                                |                                                                                                                                                      |
| 2. Goal-oriented care embraces patients’ values.                                                                              | 2.1 Goal-oriented care must be placed in patients’ context. [3, 12, 31, 35, 42]                |                                                                                                                                                      |
|                                                                                                                               | 2.2 Goal-oriented care must be tailored to patients’ needs and preferences. [1, 6, 28, 29, 38] |                                                                                                                                                      |

## 265 **Goal-oriented care is a multifaceted, dynamic and iterative process**

266 The majority of the authors presented goal-oriented care as a stepwise approach [1, 3, 4, 6, 12, 13, 17,  
267 28, 29, 40, 42, 43, 46, 54, 55]. Even though every paper defined their own approach, overall three  
268 stages could be identified: (a) goal-elicitation, (b) the actual stage of goal-setting, and (c) a reflexive  
269 goal-evaluation stage. These three stages will be further discussed.

270 Bernstein et al. emphasized the dynamic and iterative characteristics of the goal-oriented process of  
271 care [6]. They described that goal-oriented care entails going back and forth between the three stages  
272 [6]. From this perspective, goals are not described as an endpoint, but they can be adjusted, discarded,  
273 modified or new goals might be set [12, 38]. This will be further discussed in the stage of goal-  
274 evaluation.

275 Overall, in the goal-oriented process of care, the patient is described as an active partner [1].  
276 Therefore, a good communication in a continuous patient-provider relationship is described to be of  
277 utmost importance [46]. In addition, goal-oriented care should be considered as care over time rather  
278 than a one-time intervention [58]. In terms of outcomes, it is not entirely clear whether goal-oriented  
279 care should focus on (a) maintaining the status quo or (b) improving the patients' situation [12].  
280 Although there is consensus that the care process is oriented to the current needed care rather than  
281 care needed in the future [1].

## 282 **Goal-elicitation builds a patient-provider relationship**

283 As described earlier, the overall analysis could identify goal-elicitation as the first stage in the process  
284 of goal-oriented care. In this first stage, providers are presumed to offer time and space to patients to  
285 tell their stories in order to work towards the patients' agenda [29]. Therefore, patients have to be  
286 ready and should be actively encouraged to tell their story. Tinetti and colleagues described this as  
287 'the patient's state of readiness' [1]. This first stage is considered to be essential to work towards a  
288 balanced patient-provider conversation and relation. Salter et al. described this stage as a shared  
289 process between patients and providers that reinforces and further builds their relationship [28]. This

290 specific part of the process of goal-oriented care is also described as a mean to achieve a greater level  
291 of shared understanding and mutual commitment between the patient and the provider [45]. Specific  
292 attention to the stage of goal-elicitation is described to create a supportive context for effective goal-  
293 setting in the next stage [28].

## 294 **Goal-oriented care entails goal-setting**

295 Besides the goal-elicitation stage, the literature identifies a goal-setting stage. Franklin and colleagues  
296 analyzed patient-provider conversations during goal-setting and concluded that the goal-setting stage  
297 serves as a mechanism to embrace patients' needs within the social context he lives in [37]. When this  
298 process is done properly, goal-setting should support the patients to continue doing what matters  
299 most to them which would help them to cope with their conditions [37]. Within this process of goal-  
300 setting different sub attributes, that are considered necessary for proper goal-setting, could be  
301 identified.

## 302 **Patient-provider interaction guides goal-setting**

303 The patient-provider interaction is characterized by a patient-centered approach [28] in which goals  
304 are set in collaboration [47]. Hereby, patients and providers agree on health-related goals [2, 12, 13,  
305 40, 43, 47, 55, 59] and find common ground [58]. Tinetti et al. described the importance of considering  
306 patients as active partners in the goal-setting process [38]. Rijken et al. mentioned that patients' goals  
307 have to be discussed in a dynamic conversation continuously taking the patients' needs, preferences,  
308 and abilities into account [2].

309 To facilitate a collaborative approach it is suggested that providers emphasize the patients' narratives  
310 reflecting their lived experience [45]. Besides a collaborative approach, negotiation is important and  
311 considered inevitable [4, 6, 28, 42, 54]. Lenzen et al. defined this as goal-negotiation, which involves  
312 discussion of any kind of problems, exploration of the patients' values, needs and capabilities, and  
313 deliberation on patients' goals [42]. In goal-negotiation, formulating and agreeing on a specific goal  
314 are important components [28].

315 Because the goal-setting process needs to be driven by patients' needs and preferences, there seems  
316 to be a general understanding to shift the focus from the provider to the patient [29]. Different authors  
317 reported various strategies to facilitate this shift. Mold stated that the shift implies that prioritization  
318 of the individual health-related goals and the amount of effort in achieving them should be made by  
319 the individual [13]. Naik et al. stated that patients are indeed encouraged to share their priorities, but  
320 adds that providers are encouraged to align their care with the patients' health priorities [4]. More  
321 recent publications talking about goal-setting describe a circular and shared process aimed at  
322 improving the balance and power differentials in the patient-provider relationship [4, 44]. This balance  
323 can be improved by putting themselves in someone's shoes to understand the other's constraints [49].

### 324 **Patients' needs and preferences are the foundation to set goals**

325 One of the important challenges in our understanding of the concept of goal-oriented care is the lack  
326 of clear understanding on patient goals. Nearly all authors described that goals should be grounded on  
327 the patients' needs and preferences [1-4, 6, 28, 29, 37, 38, 44, 46, 52, 54, 58, 60, 61]. It is described  
328 that goals should be based on the context, resources and capabilities of patients [52], that they should  
329 be approved by patients [6], and that they should foremost represent what the patients want and not  
330 necessarily what the providers want [12, 46]. Other authors recommended that goals should be a  
331 combination of both the patients' goals and the providers' goals which in turn is related to goal-  
332 negotiation [29, 49]. In conclusion, no overall understanding on the goals could be formulated.

333 Besides this lack in understanding, there also seems to be ambiguity about the categorization of goals.  
334 Some authors emphasized that goals should contain core values of patients (e.g. the broader aspects  
335 that matter most to the patient) [1, 4] . These goals are named as 'overarching goals' [6, 12, 29, 46]  
336 leading to a broad description of the goal (e.g. I want to live in my own home as long as possible [1])  
337 [6]. Others argued that these overarching goals might not be easy to work with and describe that these  
338 goals should be broken down into sub goals (e.g. I want to walk 2 blocks without shortness of breath  
339 [1]) [6]. Goals differ for each individual and will change over time [13]. Aside from overarching goals

340 and sub goals many of the authors mention the importance of setting SMART goals [1, 6, 28, 29, 40,  
341 51, 54, 55, 58]. A SMART goal is created when patients and providers collaborate to untangle the goal  
342 itself, the importance of that goal is emphasized to the patient, the perceived achievability of the goal  
343 is evaluated, as well as the timing of the goal, and any supports and resources available [40]. On the  
344 meta-perspective, overarching goals are too broad to make SMART (think about the grandmother  
345 aiming to get her grandchildren from school as long as possible). Therefore they should be divided in  
346 the sub-goals (such as I need to be able to walk without being tired after 10 yards) that are specific  
347 enough to be measured.

348 In one of his first publications Mold brings in a specific discourse around the categorization of goals,  
349 namely that goal-oriented care should assist patients in achieving their maximum individual health  
350 potential [13], hereby making the link with health. One should however notice that health should be  
351 described from the patients' perspective; as the ability to live his life, and not as the absence of disease  
352 [1, 13]. Patients' goals are oriented towards health outcome goals. Patients hope to achieve these  
353 individual health outcomes through their health care (e.g. function, social activities, and symptom  
354 relief)[1]. Health outcome goals describe activities that promote change in physical and cognitive well-  
355 being or health [41]. Naik et al. specifically relate patient goals to the care they are willing to receive  
356 and able to perform [4].

### 357 **Care plan is based on patients' needs and preferences**

358 Many authors relate goal-oriented care to the construction of a care plan based on the patients' needs  
359 and preferences and specifically mention that these care plans should reflect the patients' personal  
360 goals that have been identified in the previous stage [1-3, 6, 12, 31, 33]. There is a consensus that the  
361 care plan should reflect the question: 'What matters to you?' [12, 38, 49, 54, 60]. Strategies to achieve  
362 the patients' needs and preferences should be implemented in the care plan [13]. Furthermore,  
363 Bernstein and colleagues stated that the care plan might also include an interprofessional review of the  
364 goals [6]. Therefore, it is necessary to involve all providers and preferably patients' informal caregivers

365 and family in the whole process [3, 6, 17]. In case that providers are confronted with patients' goals  
366 that are out of their own scope, they could benefit from an interprofessional review as they are  
367 enabled to discuss with and hand over to other providers with the required expertise. This could  
368 improve the coordination of the care plans between the different providers and facilitate integrated  
369 care delivery [1, 4, 35]. To guide this interprofessional review, no specification was given about which  
370 profile would be the best fit for having the lead. Vermunt et al. (2017) illustrated this as they found  
371 variation in who (e.g. GP, nurse, practice nurse, psychological wellbeing practitioner) should  
372 contribute to goal-setting [17].

### 373 **Care delivery according to the care plan**

374 Patients and providers should implement the care plan and translate it into care delivery. Although,  
375 little is known about how care should be delivered, it is evident that it must be in accordance with the  
376 care plan that is set up in the previous stage [6]. For this stage Tinetti et al. specifically mentioned to  
377 start the stage of care delivery by prioritizing on simple interventions in order to achieve one or more  
378 small goals to keep patients motivated [1]. This simple interventions could focus on the sub-goals  
379 described in previous paragraphs to eventually work towards the overarching goals.

### 380 **Goal-evaluation is a reflective process**

381 The overall synthesis/analysis of the literature could identify goal-evaluation as the third and final  
382 stage in the process of goal-oriented care. For this stage authors described a dynamic and iterative  
383 process that allows reflection and feedback next to assessing whether and how goals have been met  
384 [38, 54]. In this process goals can be redefined and adjusted. Possible reasons to adjust goals might be  
385 that goals have been too difficult to achieve or were no longer desired or relevant to the patients'  
386 situation [12]. Although many authors acknowledge the possibility and importance of goal adjustment,  
387 there is also discussion that goal-oriented processes of care requires that goals can be measured [13].  
388 Steele Gray and colleagues described the importance of qualifying and quantifying the process  
389 proceeded to achieve the goals [43]. In contrast, Salter and colleagues described that making the goals

390 measurable could overcomplicate and distance the patient from their own goal and might therefore  
391 not be beneficial to the process of goal-oriented care [28].

### 392 **Goal-oriented care embraces patients' values**

393 In the previous attributes, goal-oriented care is described as a dynamic and iterative process in which  
394 two underpinning values are identified [4]. First, goal-oriented care must be placed in the patient's  
395 context and second, goal-oriented care must be tailored to the patient's needs and preferences.

### 396 **Goal-oriented care must be placed in patients' context**

397 The whole goal-oriented process of care starting from goal-elicitation to goal-evaluation needs to be  
398 placed in the patient's context. According to different authors this means that the process must be  
399 tailored to the patient's situation [3, 12, 42, 60]. This does not only refer to the personal context, but  
400 also to the social and the cultural context. Therefore, this process is influenced by different contextual  
401 factors that should must be taken into account when developing the care plan [35, 42].

### 402 **Goal-oriented care must be tailored to patients' needs and preferences**

403 When reviewing the attributes, it is clear that patients' needs and preferences form the common  
404 thread. The question 'What is the matter with the patient' must be retranslated to 'What matters to  
405 the patient?' [1, 6, 28, 38]. This question enables patients to tell their story and open up in which they  
406 are considered to reflect on their achievements and personal agenda [29]. As a result, patients will  
407 have the feeling to be approached as a person instead of through their condition [6].

## 408 **CASES**

409 The method of Walker and Avant prescribes that several cases should be described to illustrate the  
410 attributes defined in step 4 [25]. The first case of Joseph encompasses all the attributes identified in  
411 the literature and is therefore identified as a model case. It is a fictive example of delivering care



412 according to the goal-oriented process of care with focus on the underpinning attributes. The second  
413 case of Ben is identified as an additional case as it lacks one or more of the attributes. E.g. in the case  
414 of Ben the stage of goal-evaluation is missing. This stage is needed to make adjustment and reflections  
415 according to the process of achieving the personal goals. Finally, the third case of Mary is an example  
416 of the opposite of goal-oriented care. This is described as a contrary case. In this case, the health care  
417 provider does not take the needs and preferences of Mary into account. The provider only thinks about  
418 convincing Mary of a healthy lifestyle which for her is not the main reason to visit her health care  
419 provider. Her main focus is on being able to go on a city trip to Madrid.

420

421

422

423

424

425

426

427

428

429

430

431 Joseph, 68- year old suffers from diabetes, hypertension and chronic obstructive pulmonary  
disease. Throughout his entire working life, he was a secondary school teacher. He has been retired  
432 for three years now. Despite the fact that he is limited by his health condition, he loves spending  
time with gardening and playing with his grandchildren.

433 A few years ago he was a passionate cyclist, but his racing bike has been stored for a long time  
now. His friends encourage him to cycle with them on a weekly base. His wife supports this  
434 initiative and argues that this will be beneficial for his social contact.

Every month Joseph visits his family doctor for a check-up. For each consultation, he prepares a list  
435 of things he wants to discuss. He has the chance to share his story in an open communication in  
which trust and mutual respect are key components.

436 In his monthly check-up with his family doctor he suggests his wishes to cycle again with his friends.  
His doctor doubts whether this will be possible and after discussion and negotiation, they plan that  
437 he would join his friends in their weekly cycling trip but only for the first two hours. The group will  
be asked to adapt their pace and Joseph will make sure that he does not need to return back home  
438 on his own. The doctor makes adjustments to the medication scheme according to the increased  
efforts Joseph will make. He will also contact the cardiologist to inform him about the changes to  
439 the medication schema. The family doctor and the cardiologist will collaborate in order to succeed  
in Joseph's goal.

440 The family doctor and Joseph agree to discuss and evaluate the course after three months. It is  
possible to increase or decrease the intensity depending on Joseph's health state and his own  
441 preferences.

442 *Box 1 Model case of Joseph*

Ben, a 30-year old man, was renovating a house that he bought with his girlfriend when he was diagnosed with MS. They made plans to marry next year and to make a world trip as honeymoon. These plans have been put aside due to the recent diagnosis. Although he was feeling down and did not have the energy to do anything he ended up with an excellent physician. Initiated by the interaction and the conversation with his physician he was enabled to set goals again and to look

*Box 2 Additional case of Ben*

Mary is a 40-year old mother of two young children and dealing with obesity since her childhood. Due to her weight, she has a lot of joints pain and is short of breath which limits her exercising capacity. Her children are already looking forward to playing outside with their mother during the summer holidays. Unfortunately, she is not able to play soccer or jump on the trampoline because of the pain. The pain becomes too much for her and after long hesitation she discusses this with her physician. The only thing she wants is to play and interact with her children as painless as possible and therefore asks her physician to prescribe some medication. Her physician does not support medication, but instructs her to first strive for a healthy weight as a solution to relieve the pain. This is not aligned with the wishes of Mary who only wanted a short-term solution to be able to play with her children. In the end, she leaves the consultation room with a referral to a dietitian and sport coach.

*Box 3 Contrary case of Mary*

443

444

445

446

## 447 **Antecedents**

448 Antecedents are events or incidents that occur prior to the investigated concept. In this concept  
449 analysis, provider preparedness and patient preparedness are required to provide goal-oriented care.

450 In terms of provider preparedness many authors discussed the importance of training [6, 7, 29, 33, 37,  
451 47, 55]. Notwithstanding that several authors [1, 4, 17, 28, 33, 38, 44] mentioned the importance of  
452 trained health care providers, there was a difference in the training they received (supplementary file  
453 3). Differences can be found in the target population reached with the training, both in  
454 monodisciplinary and interprofessional training (e.g. general practitioners [28], practice nurses [33],  
455 duration of the training (e.g. three hour [28], number of sessions [33]) and training method (e.g. role-  
456 play [38]). Thereby, the content of the training was tailored to the skills needed to carry out the  
457 intervention correctly and differ therefore in each training (S3 Table 3).

458 A second aspect that is discussed concerning provider preparedness focused on the personal skills of  
459 providers [1, 6, 17, 28]. These include communication and balancing skills in which an open  
460 communication with the patient is necessary and in which an equal balance between the patient and  
461 provider is a premise [1, 6, 17, 28]. Other defined skills were the provider's ability to listen, understand  
462 and bearing witness to the patient's story [28] and their willingness to change and learn new skills to  
463 provide care according to the goal-oriented process of care [1].

464 Besides provider preparedness some authors [1, 12, 47] specifically talked about the need of patient  
465 preparedness. Patients needed to be prepared to share their needs and preferences when entering a  
466 care relationship [1]. Some authors translate the importance of patient preparedness into patient  
467 education [1], others talked about patient guidance (11) or supporting patients in developing the skills  
468 to set personal goals [42].

469

## 470 **Consequences**

471 Consequences are those events or incidents that occur as a result of a concept. For the concept of goal-  
472 oriented care, the consequences defined throughout the papers could be categorized in: (a) patient-  
473 related consequences [1, 3, 4, 29, 35, 54], (b) provider-related consequences [1, 28, 35, 54], (c) care-  
474 related consequences [1, 28, 35] and (d) general consequences [4, 6, 35].

475 Patient-related consequences are the results for patients themselves after they received care following  
476 a goal-oriented process. A goal-directed approach could be expected to increase patient satisfaction,  
477 since the values, preferences, knowledge and opinions that each patient brought to the provider-  
478 patient relationship was more valued [45]. Also, emphasis was put on the changed way of  
479 communicating in which patients felt more freely and able to speak [3]. This led to the overall feeling  
480 of being heard, understood, respected and engaged in their care [35]. Furthermore, a goal-oriented  
481 process of care could lead to a better understanding and more in-depth knowledge of patients  
482 regarding their health, activation of patients to be more involved in their care and an increase in their  
483 overall commitment. This resulted in the increase of adherence [3]. Also Mold argued that it could  
484 contribute to a better adherence [13]. In general, the gained in-depth knowledge of patients  
485 concerning their health and a better understanding of their tasks could help to improve their quality  
486 of life [3]. This was enhanced by the maximization of function and the independence patients gained  
487 [13].

488 For providers, goal-oriented care assisted healthcare them in their decision-making [35] and gave them  
489 the opportunity to get to know their patients better. It enhanced patient-provider collaboration [13]  
490 and contributed therefore to more job satisfaction [28].

491 Care-related consequences were mainly focused on reducing costs, overtreatment and fragmentation  
492 [1, 28, 35], since care oriented to patients' priorities would reduce tests and treatments [50]. Bernsten

493 et al. stated also that goal-oriented care could lead to an improvement of quality of care and quality  
494 of life [6].

495 Although, many positive outcomes have been presented, Reuben et al. mentioned a possible downside  
496 of goal-oriented care [10]. They described that some decisions to strive for personal goals may worsen  
497 the providers' performance on aggregated health measures. For example, when a diabetic patient  
498 chooses to not follow his diet and keep on smoking, because it would be a too big lifestyle change, his  
499 HbA1c-level would not be aligned with the guidelines. Although, it could be a positive outcome from  
500 the patient perspective, it would influence the quality of care provided and the population health in a  
501 negative way.

502

503

504

505

506

507

508

509

510

511

512

513

514

## 515 **Empirical referents**

516 Empirical referents provide an overview of the identified assessments tools related to the attributes  
517 aiming to make the concept measurable.

518 None of the papers mentioned an empirical referent to measure the entire concept of goal-oriented  
519 care. Therefore, tools have been searched for each individual sub-attribute. Examples are listed in

520 Table 5 which gives an overview of possible tools and presents an example item presented in that tool.

521 Listing the existing individual empirical referents might initiate the development of an overall empirical  
522 referent.

523

| Attribute                                                      | Purpose of the tool                                                                                                                                                               | Example of item in the assessment tool                                                                                                                                                                                                                                                 |
|----------------------------------------------------------------|-----------------------------------------------------------------------------------------------------------------------------------------------------------------------------------|----------------------------------------------------------------------------------------------------------------------------------------------------------------------------------------------------------------------------------------------------------------------------------------|
| Goal-elicitation                                               |                                                                                                                                                                                   |                                                                                                                                                                                                                                                                                        |
| Davis Observation Code (DOC) [62]                              | 20-item direct observation scale for physician-patient interactions                                                                                                               | Discussing family, medical, or social history and/ or current family functioning.                                                                                                                                                                                                      |
| Goal-setting                                                   |                                                                                                                                                                                   |                                                                                                                                                                                                                                                                                        |
| Patient goal priority questionnaire [63]                       | Patient-specific measure for identification of behavioral goals and evaluation of clinically significant changes                                                                  | Which activities are most important for you to manage?                                                                                                                                                                                                                                 |
| Self-identified goals assessment [64]                          | 1) Helps patients to identify personally meaningful occupational goals to be addressed in therapy<br>2) evaluate changes levels of patient-defined success in desired occupations | Think about all of the things you want to be able to do. It might help to think about the things you did at home before you went to the hospital, and things that are hard to do now. What types of things would you like to work on or improve on in therapy before you go back home? |
| Canadian Occupational Performance Measure (COPM) [65]          | Measure of a client's self-perception of occupational performance in the areas of self-care, productivity, and leisure                                                            | Semi-structured interview – discussing daily functioning and personal life.                                                                                                                                                                                                            |
| Health outcome prioritization tool [66]                        | Tool for decision-making among older persons with multiple chronic conditions                                                                                                     | I would like to know how important 'keeping you alive', 'maintaining independence', 'reducing or eliminating pain' and 'reducing or eliminating symptoms of dizziness, fatigue, shortness of breath' is to you.                                                                        |
| Electronic Patient Reported Outcome Tool (ePRO-tool) [67]      | Tool can help patients and providers to collaboratively develop healthcare goals                                                                                                  | Goal-setting for five different areas identified as most important.                                                                                                                                                                                                                    |
| Goal-evaluation                                                |                                                                                                                                                                                   |                                                                                                                                                                                                                                                                                        |
| Goal-attainment scale [68]                                     | Tool to measure in which extent patients' goals have been met                                                                                                                     | Determining goal-attainment using 5-point scale.                                                                                                                                                                                                                                       |
| Patient Assessment of Care for Chronic Conditions (PACIC) [69] | Tool to measure quality of chronic disease care                                                                                                                                   | Asked to talk about my goals in caring for my condition.                                                                                                                                                                                                                               |



|                                                      |                                                                         |                                                                                                |     |
|------------------------------------------------------|-------------------------------------------------------------------------|------------------------------------------------------------------------------------------------|-----|
| Goal-setting evaluation tool [70]                    | Tool to rate the quality of goals and action plans                      | Does the plan identify specific actions or activities that could help to reach the goal?       | 525 |
| Person's context and patient's needs and preferences |                                                                         |                                                                                                |     |
| Person-centered primary care measure (PCPCM) [71]    | 11-item patient-reported measure to assess primary care aspects         | My doctor or practice knows me as a person/ Over time, the practice helps me to meet my goals. | 520 |
| Patient centered observation form (PCOF) [72]        | Tool to help healthcare providers communicate effectively with patients | Collaborative upfront agenda setting.                                                          |     |

## 527 **CONCLUSION OF THE CONCEPT ANALYSIS**

528 Fig. 2 represents the overall synthesis of this concept analysis of goal-oriented care. Goal-oriented care  
529 could be described as a health care approach encompassing a multifaceted, dynamic and iterative  
530 process underpinned by the patient's context and values. The process is characterized by three stages:  
531 goal-elicitation, goal-setting and goal-evaluation in which patients' needs and preferences form the  
532 common thread. In order to be able to deliver care according to the principles of the goal-oriented  
533 care process, both providers and patients need to be prepared. In terms of the consequences of goal-  
534 oriented care literature points to the potential of goal-oriented care to improve patients' experiences  
535 and provider well-being, the potential to reduce costs and improve the overall health of the  
536 population. Furthermore, a model, a contrary and an additional case illustrated an example of goal-  
537 oriented care in practice. The empirical referents showed that it is currently not possible to measure  
538 goal-oriented care in its entirety and presented an overview of possible referents for each sub  
539 attribute. Although the literature allowed us to gain more insight into the concept of goal-oriented  
540 care, different aspects need to be further discussed.

541 **Fig. 2 Schematic representation of the antecedents, attributes and consequences.**

542

543

544

545

546

547

548

## 549 **Discussion and conclusion**

550 This concept analysis aimed to tackle the lack of a common understanding of goal-oriented care by  
551 identifying the attributes, antecedents and consequences using the method of Walker and Avant [25].  
552 The overall analysis showed that a goal-oriented care generally entails three stages. Despite these  
553 three stages the process of goal-oriented care cannot be implemented as a linear protocol or checklist.  
554 Two underpinning attributes, the patient's context and the patient's needs and preferences form the  
555 common thread throughout this goal-oriented process of care. These underpinning attributes  
556 represent the philosophy of care. Goal-oriented care is a continuous interaction where you go back  
557 and forth to gain a person-centered approach (Fig. 2).

558 In the stage of goal-elicitation, greater consideration should be given to the patients' peripheral  
559 narrative reflecting their lived experiences [37]. Several authors have investigated components of goal-  
560 elicitation. Murdoch and colleagues performed a conversation analysis of patients-providers  
561 interaction during their encounters and found that eliciting the patients' understanding is an important  
562 component [73]. Ospina et al. investigated the extent to which patients' concerns are elicited across  
563 different clinical settings [74]. They concluded that providers seldom elicit the patients' agenda. This  
564 reduces the chance that providers will orient their consultation towards the specific aspects that  
565 matter to the patient [74]. One of the prerequisites to succeed in goal-elicitation is the mutual  
566 understanding about the expectations of the consultations between patients and providers and a  
567 qualitative relationship between patients and providers [73]. The literature also mentions that patients  
568 need to have a set of skills to make appropriate health decisions and reflect on their health care choices  
569 [75]. They have to be capable to open up and tell their story [76]. It is important that patients  
570 understand the meaning of information communicated by the provider, must appreciate the  
571 consequences of the treatment options, and must reason about the information based on his or her  
572 own values and preferences [76].

573 Besides the stage of goal-elicitation, the stage of goal-setting was defined. One of the remaining  
574 knowledge gaps is on what kind of goals patients set. In goal-oriented care it seems important to set  
575 goals based on the patients' needs and preferences (e.g. I want to take my grandchildren to school),  
576 while in other chronic disease management programs emphasis is mainly still on health-related goals  
577 (e.g. I want the patient to walk without pain) [4]. Various work in different settings identified that  
578 patients do not necessarily have clearly defined goals for themselves [73]. Although, several authors  
579 performed research on the categorization of patients' goals. Vermunt et al. performed for example a  
580 qualitative study to develop conceptual descriptions of goal-oriented care [47]. They presented a  
581 three-level goal hierarchy containing disease- or symptom specific goals, functional goals, and  
582 fundamental goals which provides more insight in the type of goals. A second example is the distinction  
583 made by Schellinger et al. between medical, nonmedical, multiple, and global goals [46]. Not only is  
584 there ambiguity on what goals patients set, it is also not clear how goals are being set. What is clear is  
585 that patients and providers must collaborate and negotiate on which goals are important.  
586 Nevertheless, this can still cause conflicts between the patients' goals and providers' goals [31, 66].  
587 To overcome these conflicts, it is suggested to first set the patients' goals and then discuss about the  
588 medical goals, because conflicts are more likely when goals are placed on the same level [32]. It should  
589 however be noticed that setting the patients' goals on top does not legitimate full patients'  
590 responsibility over the care plan [32]. Another way to overcome these conflicts is to work with a  
591 facilitator as Naik et al. did in developing their *patients priorities identification process*. These  
592 facilitators supported patients in setting goals, choosing the most important goals to eventually  
593 communicate them with the provider [4]. Yet another strategy is to use tools to assess patient  
594 treatment priorities and preferences. Unfortunately, Mangin et al. found few relevant tools to set  
595 patients' goals [35]. They argue for the need to develop specific strategies to make patient priorities  
596 visible in the clinical record and medical-decision making [35].

597 Goal-evaluation was pointed out as the last stage. As presented in the results, several authors  
598 described that goals should be made measurable for evaluation [28, 67]. There are some pitfalls

599 related to goal-evaluation. Salter et al. described that not all goals lend themselves to being measured  
600 [28]. It is for example challenging to evaluate the goal 'I want to take my grandchildren from school as  
601 long as possible'. Another pitfall is that patients' goals would be simplified to what can be measured.  
602 Working towards goal-evaluation might increase the pressure on patients and providers to work in the  
603 same way as disease-specific guidelines do [77]. Especially from the perspective of patients with  
604 multimorbidity it can be questioned whether disease-specific guidelines that are good for the disease  
605 are also good for the patient [77]. Furthermore, evidence shows that older multimorbid patients place  
606 quantitative health outcomes, such as longer survival, on a lower level of importance [77]. The focus  
607 must be on the patients' values and make healthcare more humane [45].

608 As mentioned for the antecedents it is important that patients and providers are prepared to work  
609 towards a goal-oriented process of care. The collaboration and co-creation between the two partners  
610 and in an interprofessional team is an important but insufficient prerequisite to succeed in providing  
611 goal-oriented care. Currently patients are not always stimulated to think about their care. They have  
612 to be stimulated to actively engage their narrative and to share their priorities. Also providers have to  
613 develop complementary skills in which they learn to let go their own assumptions and solutions. They  
614 have to learn to integrate patients' narrative in their care plan and improve their communication skills  
615 to strengthen the mutual understanding between them [78]. Voigt et al. observed that GPs are often  
616 unaware of patients' priorities in daily life, which were in contrast with their perceived importance of  
617 patient's medical goals [78]. Training and tools could provide the guidance needed to improve the  
618 communication [1, 4, 17, 28, 33, 38, 44]. It could support providers in structuring the conversation, to  
619 set goals in collaboration with patients, and to align their care to those goals. Not only does goal-  
620 oriented care offers a specific approach for one-on-one interaction between patients and providers, it  
621 could also facilitate interprofessional collaboration. It gives providers from diverse disciplines the  
622 opportunity to deliver care following the same principles and to focus on pursuing patients' goals [40].  
623 Therefore training should also include the interprofessional perspective to facilitate a uniform attitude  
624 towards the patients' goals and principles of goal-oriented care in the entire team. This will potentially

625 support providers to learn from and with each others' expertise and enable discussion between them  
626 in case that, for example, patients set goals that our out of the remit of the provider. Besides patient  
627 and provider preparedness, it could seem logical that also the system has to be prepared, but the  
628 current literature does not point to that.

629 In terms of the consequences of goal-oriented care, a limited number of studies have been able to  
630 demonstrate outcomes of goal-oriented care. Nonetheless, these studies showed mostly positive  
631 outcomes towards the patients, providers, health system, and overall population well-being. In that  
632 respect, goal-oriented care shows the potential to meet the components of the quadruple aim. It can  
633 be questioned if all providers experience increased satisfaction and well-being in providing goal-  
634 oriented care. Providers have to learn to cope with another way of delivering care. For example, a  
635 changed medication scheme as described in Josephs' case in order to work towards patients' goals.  
636 This goes against their basic principles to strive for the best possible health status including a  
637 comprehensive medication scheme. Besides that the provider well-being can be questioned, Blom et  
638 al. also contradicted the positive results for the health care system. They did not find a beneficial effect  
639 in health care use and costs when using a proactive, goal-oriented, integrated care model [33].

640

641 One of the reasons of the limited number of effectiveness studies of goal-oriented care is the lack of  
642 empirical referents. The concept must still undergo the transition towards an evaluable concept. Boyd  
643 et al. argue for measures for quality of care needed by older persons with multimorbidity as the current  
644 clinical guidelines have undesirable effects for this population [57]. Goal-oriented care is identified by  
645 Etz and colleagues as one of the main constructs when developing a new comprehensive measure of  
646 high-value aspects of primary care, however they did not mention how it has to be done [79]. Further  
647 Young et al. described outcome goals as a main construct when differentiating processes and  
648 outcomes for primary care and divided it further in goal-clarity for multimorbidity, goal-clarity for  
649 unique patient priorities and goal timing [80]. It is clear that in order to gain more insight in the  
650 consequences of goal-oriented care further research must primarily focus on how goal-oriented care

651 is provided and can be supported. In order to investigate the potential benefits of goal-oriented care,  
652 research also needs to work on developing indicators of the goal-oriented process of care.

## 653 **Strengths, limitations, and recommendations**

654 The method of Walker and Avant provides a rigorous and systematic approach to refine the concept  
655 of goal-oriented care through the existing literature. A concept analysis is an exploration of an evolving  
656 concept which will need to be enriched by new knowledge. Therefore, it is influenced by contextual  
657 factors and must undergo adjustments to new implications and new insights based on further  
658 research. Since there is no specification given by Walker and Avant on how to conduct the literature  
659 review, we followed the guidelines from a scoping review as described by Levac (2010) [26]. The  
660 iterative process of adding new articles following the snowballing method is one of the strengths  
661 compared to other types of reviews. In this concept analysis, this led to a larger number of articles than  
662 the original search. A possible explanation for this might be that goal-oriented care was covered by  
663 synonyms or similar concepts that were not covered by the original search. Despite the systematic  
664 approach, a concept analysis does not comprise a quality assessment of the literature. However, it  
665 seemed to be an appropriate method to provide the knowledge needed to understand the different  
666 components of goal-oriented care in its entirety. The literature that was included in this study were  
667 only English written and peer reviewed. It would however be interesting to add also non-English  
668 literature to be able to capture more differences (e.g. cultural differences).

669 The literature search identified both original research papers and position papers. Some original  
670 research papers [3, 4, 28, 43, 46] evaluated goal-oriented care in clinical practice. These papers  
671 identified and described goal-oriented care as a stepwise intervention. Position papers [1, 12, 13, 40,  
672 42] mostly described components of goal-oriented care rather than such a stepwise approach. The  
673 combination of both types gave more insight in the broad components of goal-oriented care.

674 This concept analysis could also be considered as a preliminary step to facilitate further research. One  
675 of the knowledge gaps revealed in this concept analysis is the lack of knowledge on what patients'  
676 goals are set, how goal-oriented care is delivered, and how it is best put into practice in both one-on-  
677 one interactions between patients and providers and in interprofessional collaboration. Regarding  
678 patients it is important to gain more insight in how they are preferably prepared for discussing their  
679 personal goals. In addition, the list of empirical referents made clear that a golden standard to evaluate  
680 goal-oriented care is missing. Initiating the development of an evaluation method could enable future  
681 intervention studies to gain more insight in the consequences of goal-oriented care and to make results  
682 comparable. Increasing insights from effective goal-oriented care could highlight its multiple benefits  
683 towards providers and policy makers. These results might also inform the healthcare system in which  
684 resources they need to facilitate goal-oriented care. A following step will first be to discuss these  
685 theoretical insights with patients and providers and deepen this information with insights from  
686 practices. Then, when goal-oriented care is well understood, a critical review can be set up to perform  
687 in-depth comparison between other concepts and frameworks. At this moment, we have  
688 (unfortunately) insufficient information to do this.

689 Goal-oriented care shows the potential to be a way forward for patients with chronic conditions and  
690 multimorbidity. However, further research is needed to translate the current knowledge on the  
691 concept of goal-oriented care into a tangible workflow process of care that entails the three stages.  
692 This workflow should consists of tools to prepare patients and providers to offer goal-oriented care.  
693 This could contribute to finding a common ground in the goals and implementing goal-oriented care  
694 in practice.

695

696

697



## 698 **Conclusion**

699 This concept analysis aimed to translate the concept of goal-oriented care into a common  
700 understanding so providers can better understand and use this concept in clinical practice. The various  
701 literature on goal-oriented care, based on position and original research papers, showed a stepwise  
702 approach of three stages. Overall, the underpinning attributes of patients' context and patients' values  
703 form a philosophy of care to which the process must be reflected. Furthermore, both patients and the  
704 providers need to develop new skills in order to rethink the way care is provided. Patients must  
705 therefore be enabled to open up and reflect on their own agenda. Providers instead must learn to let  
706 go their own assumptions and solutions and communicate with their patients in a more balanced  
707 context. Based on the literature goal-oriented care shows the potential to improve patients'  
708 experience by listening to their needs and preferences, improve providers' well-being by the feeling of  
709 more satisfaction and reduce health care costs. Goal-oriented care could answer the challenges  
710 patients face with multiple care processes by initiating interprofessional collaboration. However,  
711 further research must focus on what and how goals are set, the translation of these findings into a  
712 workflow and must initiate the development of an evaluation method in order to investigate the  
713 effects of goal-oriented care processes on patients, providers and the health care system.

## 714 **Acknowledgments**

715 We are grateful for the partnership with the Primary Care Academy ([academie-eerstelijjn.be](http://academie-eerstelijjn.be)) and want  
716 to thank the King Baudouin Foundation and Fund Daniel De Coninck for the opportunity they offer us  
717 for conducting research and have impact on the primary care of Flanders, Belgium. The consortium of  
718 the Primary Care Academy consists of: Lead author: Roy Remmen – [roy.remmen@uantwerpen.be](mailto:roy.remmen@uantwerpen.be) -  
719 Department of Primary Care and Interdisciplinary Care, Faculty of Medicine and Health Sciences.  
720 University of Antwerp. Antwerp. Belgium; Emily Verté - Department of Primary Care and  
721 Interdisciplinary Care, Faculty of Medicine and Health Sciences. University of Antwerp. Antwerp.

722 Belgium, Department of Family Medicine and Chronic Care, Faculty of Medicine and Pharmacy. Vrije  
723 Universiteit Brussel. Brussel. Belgium; Muhammed Mustafa Sirimsi - Centre for research and  
724 innovation in care, Faculty of Medicine and Health Sciences. University of Antwerp. Antwerp. Belgium;  
725 Peter Van Bogaert - Workforce Management and Outcomes Research in Care, Faculty of Medicine and  
726 Health Sciences. University of Antwerp. Belgium; Hans De Loof - Laboratory of Physio pharmacology,  
727 Faculty of Pharmaceutical Biomedical and Veterinary Sciences. University of Antwerp. Belgium; Kris  
728 Van den Broeck - Department of Primary Care and Interdisciplinary Care, Faculty of Medicine and  
729 Health Sciences. University of Antwerp. Antwerp. Belgium.; Sibyl Anthierens -  
730 Department of Primary Care and Interdisciplinary Care, Faculty of Medicine and Health Sciences.  
731 University of Antwerp. Antwerp. Belgium; Ine Huybrechts - Department of Primary Care and  
732 Interdisciplinary Care, Faculty of Medicine and Health Sciences. University of Antwerp. Antwerp.  
733 Belgium.; Peter Raeymaeckers - Department of Sociology, Faculty of Social Sciences, Faculty of Social  
734 Sciences. University of Antwerp. Belgium; Veerle Buffel- Department of Sociology; centre for  
735 population, family and health, Faculty of Social Sciences. University of Antwerp. Belgium. ; Dirk  
736 Devroey- Department of Family Medicine and Chronic Care, Faculty of Medicine and Pharmacy. Vrije  
737 Universiteit Brussel. Brussel.; Bert Aertgeerts - Academic Centre for General Practice, Faculty of  
738 Medicine. KU Leuven. Leuven, Department of Public Health and Primary Care, Faculty of Medicine, KU  
739 Leuven. Leuven; Birgitte Schoenmakers - Department of Public Health and Primary Care, Faculty of  
740 Medicine, KU Leuven. Leuven. Belgium; Lotte Timmermans - Department of Public Health and Primary  
741 Care, Faculty of Medicine, KU Leuven. Leuven. Belgium.; Veerle Foulon - Department of Pharmaceutical  
742 and Pharmacological Sciences, Faculty Pharmaceutical Sciences. KU Leuven. Leuven. Belgium.; Anja  
743 Declerq - LUCAS-Centre for Care Research and Consultancy, Faculty of Social Sciences. KU Leuven.  
744 Leuven. Belgium.; Nick Verhaeghe - Research Group Social and Economic Policy and Social Inclusion,  
745 Research Institute for Work and Society. KU Leuven. Belgium.; Dominique Van de Velde  
746 Department of Rehabilitation Sciences, Occupational Therapy. Faculty of Medicine and Health  
747 Sciences. University of Ghent. Belgium., Department of Occupational Therapy. Artevelde University of

748 Applied Sciences. Ghent. Belgium.; Pauline Boeckxstaens - Department of Public Health and Primary  
749 Care, Faculty of Medicine and Health sciences. University of Ghent. Belgium.; An De Sutter -  
750 Department of Public Health and Primary Care, Faculty of Medicine and Health sciences. University of  
751 Ghent. Belgium.; Patricia De Vriendt - Department of Rehabilitation Sciences, Occupational Therapy.  
752 Faculty of Medicine and Health Sciences. University of Ghent. Belgium., Frailty in Ageing (FRIA)  
753 Research Group, Department of Gerontology and Mental Health and Wellbeing (MENT) research  
754 group, Faculty of Medicine and Pharmacy. Vrije Universiteit. Brussels. Belgium., Department of  
755 Occupational Therapy. Artevelde University of Applied Sciences. Ghent. Belgium.; Lies Lahousse  
756 - Department of Bioanalysis, Faculty of Pharmaceutical Sciences, Ghent University. Ghent. Belgium.;

757 Peter Pype - Department of Public Health and Primary Care, Faculty of Medicine and Health sciences.  
758 University of Ghent. Belgium., End-of-Life Care Research Group, Faculty of Medicine and Health  
759 Sciences. Vrije Universiteit Brussel and Ghent University. Ghent. Belgium.; Dagje Boeykens-  
760 Department of Rehabilitation Sciences, Occupational Therapy. Faculty of Medicine and Health  
761 Sciences. University of Ghent. Belgium., Department of Public Health and Primary Care, Faculty of  
762 Medicine and Health sciences. University of Ghent. Belgium.; Ann Van Hecke - Department of Public  
763 Health and Primary Care, Faculty of Medicine and Health sciences. University of Ghent. Belgium.,  
764 University Centre of Nursing and Midwifery, Faculty of Medicine and Health Sciences. University of  
765 Ghent. Belgium.; Peter Decat - Department of Public Health and Primary Care, Faculty of Medicine and  
766 Health sciences. University of Ghent. Belgium.; Rudi Roose - Department of Social Work and Social  
767 Pedagogy, Faculty of Psychology and Educational Sciences. University Ghent. Belgium.; Sandra Martin  
768 - Expertise Centre Health Innovation. University College Leuven-Limburg. Leuven. Belgium.; Erica  
769 Rutten - Expertise Centre Health Innovation. University College Leuven-Limburg. Leuven. Belgium.;

770 Sam Pless - Expertise Centre Health Innovation. University College Leuven-Limburg. Leuven. Belgium.;

771 Vanessa Gauwe - Department of Occupational Therapy. Artevelde University of Applied Sciences.  
772 Ghent. Belgium.; Didier Reynaert- E-QUAL, University College of Applied Sciences Ghent. Ghent.  
773 Belgium.; Leen Van Landschoot - Department of Nursing, University of Applied Sciences Ghent. Ghent.

774 Belgium.; Maja Lopez Hartmann - Department of Welfare and Health, Karel de Grote University of  
775 Applied Sciences and Arts. Antwerp. Belgium.; Tony Claeys- LiveLab, VIVES University of Applied  
776 Sciences. Kortrijk. Belgium.; Hilde Vandenhoudt - LiCalab, Thomas University of Applied Sciences.  
777 Turnhout. Belgium.; Kristel De Vlieghe - Department of Nursing – homecare, White-Yellow Cross.  
778 Brussels. Belgium.; Susanne Op de Beeck - Flemish Patient Platform. Heverlee. Belgium.

779

780

781

782

783

784

785

786

787

788

789

790

791

792

793

794

## References

- 796 1. Tinetti ME, Esterson J, Ferris R, Posner P, Blaum CS. Patient Priority-Directed Decision Making  
797 and Care for Older Adults with Multiple Chronic Conditions. *Clinics in geriatric medicine*.  
798 2016;32(2):261-75. PubMed PMID: 27113145.
- 799 2. Rijken M, Bekkema N, Boeckxstaens P, Schellevis FG, De Maeseneer JM, Groenewegen PP.  
800 Chronic Disease Management Programmes: an adequate response to patients' needs? *Health Expect*.  
801 2014;17(5):608-21. Epub 2012/06/21. doi: 10.1111/j.1369-7625.2012.00786.x. PubMed PMID:  
802 22712877; PubMed Central PMCID: PMC5060914.
- 803 3. Feder SL, Kiwak E, Costello D, Dindo L, Hern, ez-Bigos K, et al. Perspectives of Patients in  
804 Identifying Their Values-Based Health Priorities. *Journal of the American Geriatrics Society*. 2019  
805 67(7):1379-85. PubMed PMID: 30844080.
- 806 4. Naik AD, Dindo LN, Van Liew JR, Hundt NE, Vo L, Hern, et al. Development of a Clinically  
807 Feasible Process for Identifying Individual Health Priorities. *Journal of the American Geriatrics*  
808 *Society*. 2018;66(10):1872-9. PubMed PMID: 30047069467.
- 809 5. Cassell A, Edwards D, Harshfield A, Rhodes K, Brimicombe J, Payne R, et al. The epidemiology  
810 of multimorbidity in primary care: a retrospective cohort study. *Br J Gen Pract*. 2018;68(669):e245-  
811 e51. Epub 2018/03/14. doi: 10.3399/bjgp18X695465. PubMed PMID: 29530918; PubMed Central  
812 PMCID: PMC5863678.
- 813 6. Berntsen G, Hoyem A, Lettrem I, Ruland C, Rumpsfeld M, Gammon D. A person-centered  
814 integrated care quality framework, based on a qualitative study of patients' evaluation of care in light  
815 of chronic care ideals. *BMC Health Serv Res*. 2018;18(1):479. Epub 2018/06/22. doi: 10.1186/s12913-  
816 018-3246-z. PubMed PMID: 29925357; PubMed Central PMCID: PMC6011266.
- 817 7. Ploeg J, Matthew-Maich N, Fraser K, Dufour S, McAiney C, Kaasalainen S, et al. Managing  
818 multiple chronic conditions in the community: a Canadian qualitative study of the experiences of  
819 older adults, family caregivers and healthcare providers. *BMC Geriatr*. 2017;17(1):40.
- 820 8. Kramer MH, Bauer W, Dicker D, Durusu-Tanriover M, Ferreira F, Rigby SP, et al. The changing  
821 face of internal medicine: patient centred care. *European journal of internal medicine*. 25(2):125-7.  
822 PubMed PMID: 24472695.
- 823 9. Kuluski K, Peckham A, Gill A, Gagnon D, Wong-Cornall C, McKillop A, et al. What is Important  
824 to Older People with Multimorbidity and Their Caregivers? Identifying Attributes of Person Centered  
825 Care from the User Perspective. *Int J Integr Care*. 2019;19(3):4. Epub 2019/08/02. doi:  
826 10.5334/ijic.4655. PubMed PMID: 31367203; PubMed Central PMCID: PMC6659759.
- 827 10. Reuben DB, Tinetti ME. Goal-oriented patient care--an alternative health outcomes  
828 paradigm. *The New England journal of medicine*. 2012;366(9):777-9. Epub 2012/03/02. doi:  
829 10.1056/NEJMp1113631. PubMed PMID: 22375966.
- 830 11. Kuipers SJ, Cramm JM, Nieboer AP. The importance of patient-centered care and co-creation  
831 of care for satisfaction with care and physical and social well-being of patients with multi-morbidity  
832 in the primary care setting. *BMC Health Serv Res*. 2019;19(1):1-9.
- 833 12. Reuben DB, Jennings LA. Putting Goal-Oriented Patient Care Into Practice. *Journal of the*  
834 *American Geriatrics Society*. 2019;67(7):1342-4. PubMed PMID: 30882888.
- 835 13. Mold JW, Blake GH, Becker LA. Goal-oriented medical care. *Family medicine*. 1991;23(1):46-  
836 51. Epub 1991/01/01. PubMed PMID: 2001782.
- 837 14. Sackett DL, Rosenberg WM, Gray JM, Haynes RB, Richardson WS. Evidence based medicine:  
838 what it is and what it isn't. *British Medical Journal Publishing Group*; 1996.
- 839 15. Baker A. Crossing the quality chasm: a new health system for the 21st century: *British*  
840 *Medical Journal Publishing Group*; 2001.

- 841 16. Elwyn G, Frosch D, Thomson R, Joseph-Williams N, Lloyd A, Kinnersley P, et al. Shared  
842 decision making: a model for clinical practice. *Journal of general internal medicine*.  
843 2012;27(10):1361-7.
- 844 17. Vermunt N, Harmsen M, Westert GP, Olde Rikkert MGM, Faber MJ. Collaborative goal setting  
845 with elderly patients with chronic disease or multimorbidity: a systematic review. *BMC Geriatr*.  
846 2017;17(1):167. Epub 2017/08/02. doi: 10.1186/s12877-017-0534-0. PubMed PMID: 28760149;  
847 PubMed Central PMCID: PMC5537926.
- 848 18. Poitras ME, Maltais ME, Bestard-Denomme L, Stewart M, Fortin M. What are the effective  
849 elements in patient-centered and multimorbidity care? A scoping review. *BMC Health Serv Res*.  
850 2018;18(1):446. Epub 2018/06/15. doi: 10.1186/s12913-018-3213-8. PubMed PMID: 29898713;  
851 PubMed Central PMCID: PMC6001147.
- 852 19. Hobbs FR, Bankhead C, Mukhtar T, Stevens S, Perera-Salazar R, Holt T, et al. Clinical workload  
853 in UK primary care: a retrospective analysis of 100 million consultations in England, 2007–14. *The*  
854 *Lancet*. 2016;387(10035):2323-30.
- 855 21. Institute of Medicine Committee on the Future of Primary Care. In: Donaldson M, Yordy K,  
856 Vanselow N, editors. *Defining Primary Care: An Interim Report*. Washington (DC): National  
857 Academies Press (US) Copyright 1994 by the National Academy of Sciences.; 1994.
- 858 22. Ellner AL, Phillips RS. The Coming Primary Care Revolution. *J Gen Intern Med*.  
859 2017;32(4):380-6. Epub 2017/03/01. doi: 10.1007/s11606-016-3944-3. PubMed PMID: 28243869;  
860 PubMed Central PMCID: PMC5377886.
- 861 23. Elwyn G, Durand MA, Song J, Aarts J, Barr PJ, Berger Z, et al. A three-talk model for shared  
862 decision making: multistage consultation process. *bmj*. 2017;359:j4891.
- 863 24. Lusk JM, Fater K. A concept analysis of patient-centered care. *Nurs Forum*. 2013;48(2):89-98.  
864 Epub 2013/04/23. doi: 10.1111/nuf.12019. PubMed PMID: 23600637.
- 865 25. Walker LOA, K.C. Strategies for theory constructing in nursing. Texas2019.
- 866 26. Levac D, Colquhoun H, O'Brien KK. Scoping studies: advancing the methodology. *Implement*  
867 *Sci*. 2010;5:69. Epub 2010/09/22. doi: 10.1186/1748-5908-5-69. PubMed PMID: 20854677; PubMed  
868 Central PMCID: PMC2954944.
- 869 27. Mourad Ouzzani HH, Zbys Fedorowicz, and Ahmed Elmagarmid. Rayyan - a web and mobile  
870 app for systematic reviews. . *Systematic Reviews*. 2016;5(210). doi: 10.1186/s13643-016-0384-4.
- 871 28. Salter C, Shiner A, Lenaghan E, Murdoch J, Ford JA, Winterburn S, et al. Setting goals with  
872 patients living with multimorbidity: qualitative analysis of general practice consultations. *Br J Gen*  
873 *Pract*. 2019;69(684):e479-e88. Epub 2019/06/05. doi: 10.3399/bjgp19X704129. PubMed PMID:  
874 31160370; PubMed Central PMCID: PMC6592350.
- 875 29. Kessler D, Walker I, Sauve-Schenk K, Egan M. Goal setting dynamics that facilitate or impede  
876 a client-centered approach. *Scandinavian journal of occupational therapy*. 2018;26(5):315-24.  
877 PubMed PMID: 29671662.
- 878 30. De Maeseneer J, Boeckxstaens P. Care for noncommunicable diseases (NCDs): time for a  
879 paradigm-shift. *World hospitals and health services : the official journal of the International Hospital*  
880 *Federation*. 2011;47(4):30-3. PubMed PMID: 22619872.
- 881 31. Bayliss EA, Bonds DE, Boyd CM, Davis MM, Finke B, Fox MH, et al. Understanding the context  
882 of health for persons with multiple chronic conditions: moving from what is the matter to what  
883 matters. *Ann Fam Med*. 2014;12(3):260-9. Epub 2014/05/14. doi: 10.1370/afm.1643. PubMed PMID:  
884 24821898; PubMed Central PMCID: PMC4018375.
- 885 32. Berntsen GK, Gammon D, Steinsbekk A, Salamonsen A, Foss N, Ruland C, et al. How do we  
886 deal with multiple goals for care within an individual patient trajectory? A document content analysis  
887 of health service research papers on goals for care. *BMJ open*. 2015;5(12):e009403. Epub  
888 2015/12/15. doi: 10.1136/bmjopen-2015-009403. PubMed PMID: 26656243; PubMed Central  
889 PMCID: PMC4679896.
- 890 33. Blom J, Elzen WD, Houwelingen Anne HV, Heijmans M, Stijnen T, Van Den Hout W, et al.  
891 Effectiveness and cost-effectiveness of a proactive, goal-oriented, integrated care model in general

892 practice for older people. A cluster randomised controlled trial: Integrated systematic care for older  
893 people-the ISCOPE study. *Age and Ageing*. 2016;45(1):30-41. doi: 10.1093/ageing/afv174.

894 34. Boeckxstaens, Willems, Lanssens, Decuypere, Brusselle, Kühlein, et al. A qualitative  
895 interpretation of challenges associated with helping patients with multiple chronic diseases identify  
896 their goals. *Journal of comorbidity*. 2016;6(2):120-6.

897 35. Mangin D, Stephen G, Bismah V, Risdon C. Making patient values visible in healthcare: a  
898 systematic review of tools to assess patient treatment priorities and preferences in the context of  
899 multimorbidity. *BMJ open*. 2016;6(6):e010903.

900 36. Schmidt K, Babac A, Pauer F, Damm K, von der Schulenburg JM. Measuring patients' priorities  
901 using the Analytic Hierarchy Process in comparison with Best-Worst-Scaling and rating cards:  
902 methodological aspects and ranking tasks. *Health economics review*. 2016;6(1):50. PubMed PMID:  
903 27844450.

904 37. Franklin M, Lewis S, Willis K, Rogers A, Venville A, Smith L. Controlled, Constrained, or  
905 Flexible? How Self-Management Goals Are Shaped By Patient-Provider Interactions. *Qualitative  
906 health research*. 2019;1049732318774324. PubMed PMID: 29871583.

907 38. Tinetti M, Dindo L, Smith CD, Blaum C, Costello D, Ouellet G, et al. Challenges and strategies  
908 in patients' health priorities-aligned decision-making for older adults with multiple chronic  
909 conditions. *PloS one*. 2019;14(6):e0218249. PubMed PMID: 31181117.

910 39. Hurn J, Kneebone I, Cropley M. Goal setting as an outcome measure: A systematic review.  
911 *Clinical rehabilitation*. 2006;20(9):756-72. Epub 2006/09/29. doi: 10.1177/0269215506070793.  
912 PubMed PMID: 17005500.

913 40. Bodenheimer T, Handley MA. Goal-setting for behavior change in primary care: an  
914 exploration and status report. *Patient education and counseling*. 2009;76(2):174-80. Epub  
915 2009/06/30. doi: 10.1016/j.pec.2009.06.001. PubMed PMID: 19560895.

916 41. Junius-Walker U, Stolberg D, Steinke P, Theile G, Hummers-Pradier E, Dierks M-L. Health and  
917 treatment priorities of older patients and their general practitioners: a cross-sectional study. *Quality  
918 in primary care*. 2011;19(2).

919 42. Lenzen SA, Daniels R, van Bokhoven MA, van der Weijden T, Beurskens A. Setting goals in  
920 chronic care: Shared decision making as self-management support by the family physician. *The  
921 European journal of general practice*. 2015;21(2):138-44. Epub 2014/12/30. doi:  
922 10.3109/13814788.2014.973844. PubMed PMID: 25541857.

923 43. Steele Gray C, Wodchis WP, Upshur R, Cott C, McKinstry B, Mercer S, et al. Supporting Goal-  
924 Oriented Primary Health Care for Seniors with Complex Care Needs Using Mobile Technology:  
925 Evaluation and Implementation of the Health System Performance Research Network, Bridgepoint  
926 Electronic Patient Reported Outcome Tool. *JMIR research protocols*. 2016;5(2):e126. PubMed PMID:  
927 27341765.

928 44. Kangovi S, Mitra N, Smith RA, Kulkarni R, Turr L, Huo H, et al. Decision-making and goal-  
929 setting in chronic disease management: Baseline findings of a randomized controlled trial. *Patient  
930 Educ Couns*. 2017;100(3):449-55. Epub 2016/10/09. doi: 10.1016/j.pec.2016.09.019. PubMed PMID:  
931 27717532; PubMed Central PMCID: PMC5437864.

932 45. Mold. Goal-directed health care: redefining health and health care in the era of value-based  
933 care. *Cureus* 2017;9(2).

934 46. Schellinger SE, Anderson EW, Frazer MS, Cain CL. Patient Self-Defined Goals: Essentials of  
935 Person-Centered Care for Serious Illness. *The American journal of hospice & palliative care*.  
936 2018;35(1):159-65. Epub 2017/03/24. doi: 10.1177/1049909117699600. PubMed PMID: 28330379;  
937 PubMed Central PMCID: PMC5704564.

938 47. Vermunt NP, Harmsen M, Elwyn G, Westert GP, Burgers JS, Olde Rikkert MG, et al. A three-  
939 goal model for patients with multimorbidity: A qualitative approach. *Health expectations : an  
940 international journal of public participation in health care and health policy*. 2018;21(2):528-38.  
941 PubMed PMID: 29193557.

942 48. de Groot E, Schonrock-Adema J, Zwart D, Damoiseaux R, Van den Bogerd K, Diemers A, et al.  
943 Learning from patients about patient-centredness: A realist review: BEME Guide No. 60. *Medical*

944 teacher. 2019;1-13. Epub 2019/12/20. doi: 10.1080/0142159x.2019.1695767. PubMed PMID:  
945 31852313.

946 49. Kuluski K, Guilcher SJT. Toward a Person-Centred Learning Health System: Understanding  
947 Value from the Perspectives of Patients and Caregivers. *HealthcarePapers*. 2019;18(4):36-46. Epub  
948 2020/01/05. doi: 10.12927/hcpap.2019.26030. PubMed PMID: 31901067.

949 50. Tinetti ME, Naik AD, Dindo L, Costello DM, Esterson J, Geda M, et al. Association of Patient  
950 Priorities-Aligned Decision-Making with Patient Outcomes and Ambulatory Health Care Burden  
951 among Older Adults with Multiple Chronic Conditions: A Nonrandomized Clinical Trial. *JAMA Internal  
952 Medicine*. 2019. PubMed PMID: rayyan-47069570.

953 51. Eckhoff DO, Weiss J. Goal setting: A concept analysis. *Nursing forum*. 2020. Epub 2020/01/07.  
954 doi: 10.1111/nuf.12426. PubMed PMID: 31902133.

955 53. Sathanapally H, Sidhu M, Fahami R, Gillies C, Kadam U, Davies MJ, et al. Priorities of patients  
956 with multimorbidity and of clinicians regarding treatment and health outcomes: a systematic mixed  
957 studies review. *BMJ open*. 2020;10(2):e033445. Epub 2020/02/14. doi: 10.1136/bmjopen-2019-  
958 033445. PubMed PMID: 32051314.

959 54. Reuben DB, Tinetti ME. Goal-oriented patient care - An alternative health outcomes  
960 paradigm. *New England Journal of Medicine*. 2012;366(9):777-9. doi: 10.1056/NEJMp1113631.

961 55. Heisler M, Bouknight RR, Hayward RA, Smith DM, Kerr EA. The relative importance of  
962 physician communication, participatory decision making, and patient understanding in diabetes self-  
963 management. *Journal of general internal medicine*. 2002;17(4):243-52.

964 56. Purkale BA, Nagykaldi ZJ, Allahyar A, Todd R, Mold JW. Physicians' Response to Patients'  
965 Quality-of-Life Goals. *J Am Board Fam Med*. 2020;33(1):71-9. Epub 2020/01/08. doi:  
966 10.3122/jabfm.2020.01.190169. PubMed PMID: 31907248.

967 57. Boyd CM, Darer J, Boulton C, Fried LP, Boulton L, Wu AW. Clinical practice guidelines and quality of  
968 care for older patients with multiple comorbid diseases: implications for pay for performance. *Jama*.  
969 2005;294(6):716-24. Epub 2005/08/11. doi: 10.1001/jama.294.6.716. PubMed PMID: 16091574.

970 58. Mangin D, Stephen G, Bismah V, Risdon C. Making patient values visible in healthcare: A  
971 systematic review of tools to assess patient treatment priorities and preferences in the context of  
972 multimorbidity. *BMJ Open*. 2016;6(6). doi: 10.1136/bmjopen-2015-010903.

973 59. Vermunt NP, Harmsen M, Westert GP, Rikkert MGO, Faber MJ. Collaborative goal setting  
974 with elderly patients with chronic disease or multimorbidity: a systematic review. *BMC geriatrics*.  
975 2017;17(1):167.

976 60. Boyd CM, Wolff JL, Giovannetti E, Reider L, Weiss C, Xue Q-I, et al. Health care task difficulty  
977 among older adults with multimorbidity. *Medical care*. 2014;52(0 3):S118.

978 61. Locke EA, Latham GP. *A theory of goal setting & task performance*: Prentice-Hall, Inc; 1990.

979 62. Callahan EJ, Bertakis KD. Development and validation of the Davis Observation Code. *Fam  
980 Med*. 1991;23(1):19-24. Epub 1991/01/01. PubMed PMID: 2001776.

981 63. Åsenlöf P, Siljebäck K. The patient goal priority questionnaire is moderately reproducible in  
982 people with persistent musculoskeletal pain. *Physical therapy*. 2009;89(11):1226-34.

983 64. Melville LL, Baltic TA, Bettcher TW, Nelson DL. Patients' perspectives on the self-identified  
984 goals assessment. *Am J Occup Ther*. 2002;56(6):650-9. Epub 2002/12/03. doi: 10.5014/ajot.56.6.650.  
985 PubMed PMID: 12458857.

986 65. Dedding C, Cardol M, Eyssen IC, Dekker J, Beelen A. Validity of the Canadian Occupational  
987 Performance Measure: a client-centred outcome measurement. *Clinical rehabilitation*.  
988 2004;18(6):660-7. Epub 2004/10/12. doi: 10.1191/0269215504cr746oa. PubMed PMID: 15473118.

989 66. Fried TR, Tinetti M, Agostini J, Iannone L, Towle V. Health outcome prioritization to elicit  
990 preferences of older persons with multiple health conditions. *Patient education and counseling*.  
991 2011;83(2):278-82.

992 67. Steele Gray C, Gill A, Khan AI, Hans PK, Kuluski K, Cott C. The Electronic Patient Reported  
993 Outcome Tool: Testing Usability and Feasibility of a Mobile App and Portal to Support Care for  
994 Patients With Complex Chronic Disease and Disability in Primary Care Settings. *JMIR Mhealth*



995 Uhealth. 2016;4(2):e58. Epub 2016/06/04. doi: 10.2196/mhealth.5331. PubMed PMID: 27256035;  
996 PubMed Central PMCID: PMCPMC4911509.

997 68. Toto PE, Skidmore ER, Terhorst L, Rosen J, Weiner DK. Goal Attainment Scaling (GAS) in  
998 geriatric primary care: a feasibility study. *Arch Gerontol Geriatr.* 2015;60(1):16-21. Epub 2014/12/04.  
999 doi: 10.1016/j.archger.2014.10.022. PubMed PMID: 25465505.

1000 69. Glasgow RE, Wagner EH, Schaefer J, Mahoney LD, Reid RJ, Greene SM. Development and  
1001 validation of the Patient Assessment of Chronic Illness Care (PACIC). *Med Care.* 2005;43(5):436-44.  
1002 Epub 2005/04/20. doi: 10.1097/01.mlr.0000160375.47920.8c. PubMed PMID: 15838407.

1003 70. Teal CR, Haidet P, Balasubramanyam AS, Rodriguez E, Naik AD. Measuring the quality of  
1004 patients' goals and action plans: development and validation of a novel tool. *BMC medical  
1005 informatics and decision making.* 2012;12:152. Epub 2012/12/29. doi: 10.1186/1472-6947-12-152.  
1006 PubMed PMID: 23270422; PubMed Central PMCID: PMCPMC3544573.

1007 71. Etz RS, Zyzanski SJ, Gonzalez MM, Reves SR, O'Neal JP, Stange KC. A New Comprehensive  
1008 Measure of High-Value Aspects of Primary Care. *Annals of family medicine.* 2019;17(3):221-30.  
1009 PubMed PMID: rayyan-47069321.

1010 72. Adam P, Murphy CF, Dierich M, Hager KD. Seven Years of Teaching Communication With the  
1011 Patient-Centered Observation Form. *Fam Med.* 2018;50(2):132-7. Epub 2018/02/13. doi:  
1012 10.22454/FamMed.2018.516713. PubMed PMID: 29432629.

1013 73. Murdoch J, Salter C, Ford J, Lenaghan E, Shiner A, Steel N. The "unknown territory" of goal-  
1014 setting: Negotiating a novel interactional activity within primary care doctor-patient consultations for  
1015 patients with multiple chronic conditions. *Soc Sci Med.* 2020;256:113040. Epub 2020/05/31. doi:  
1016 10.1016/j.socscimed.2020.113040. PubMed PMID: 32473530; PubMed Central PMCID:  
1017 PMCPMC7306159.

1018 74. Singh Ospina N, Phillips KA, Rodriguez-Gutierrez R, Castaneda-Guarderas A, Gionfriddo MR,  
1019 Branda ME, et al. Eliciting the Patient's Agenda- Secondary Analysis of Recorded Clinical Encounters. *J  
1020 Gen Intern Med.* 2019;34(1):36-40. Epub 2018/07/04. doi: 10.1007/s11606-018-4540-5. PubMed  
1021 PMID: 29968051; PubMed Central PMCID: PMCPMC6318197.

1022 75. Hersh L, Salzman B, Snyderman D. Health Literacy in Primary Care Practice. *Am Fam  
1023 Physician.* 2015;92(2):118-24. Epub 2015/07/16. PubMed PMID: 26176370.

1024 76. Sine DM, Sharpe VA. Ethics, risk, and patient-centered care: how collaboration between  
1025 clinical ethicists and risk management leads to respectful patient care. *J Healthc Risk Manag.*  
1026 2011;31(1):32-7. Epub 2011/07/28. doi: 10.1002/jhrm.20077. PubMed PMID: 21793115.

1027 77. Tinetti ME, Bogardus Jr ST, Agostini JV. Potential pitfalls of disease-specific guidelines for  
1028 patients with multiple conditions. *N Engl J Med.* 2004;351(27):2870-4.

1029 78. Voigt I, Wrede J, Diederichs-Egidi H, Dierks ML, Junius-Walker U. Priority setting in general  
1030 practice: health priorities of older patients differ from treatment priorities of their physicians.  
1031 *Croatian medical journal.* 2010;51(6):483-92. Epub 2010/12/17. doi: 10.3325/cmj.2010.51.483.  
1032 PubMed PMID: 21162160; PubMed Central PMCID: PMCPMC3012393.

1033 79. Etz R, Stange KC. Measuring what matters in primary care. *Global Advances in Health and  
1034 Medicine.* 2018;7:263. doi: 10.1177/2164956118773837.

1035 80. Young RA, Roberts RG, Holden RJ. The Challenges of Measuring, Improving, and Reporting  
1036 Quality in Primary Care. *Annals of family medicine.* 2017;15(2):175-82. Epub 2017/03/16. doi:  
1037 10.1370/afm.2014. PubMed PMID: 28289120; PubMed Central PMCID: PMCPMC5348238.

1038

1039

1040

1041 **Supporting information**

1042 **S1 Table 1. Overview preliminary version attributes.**

1043 **S2 Table 2. Overview training.**

1044 **S1 File. Prisma scr checklist.**

1045

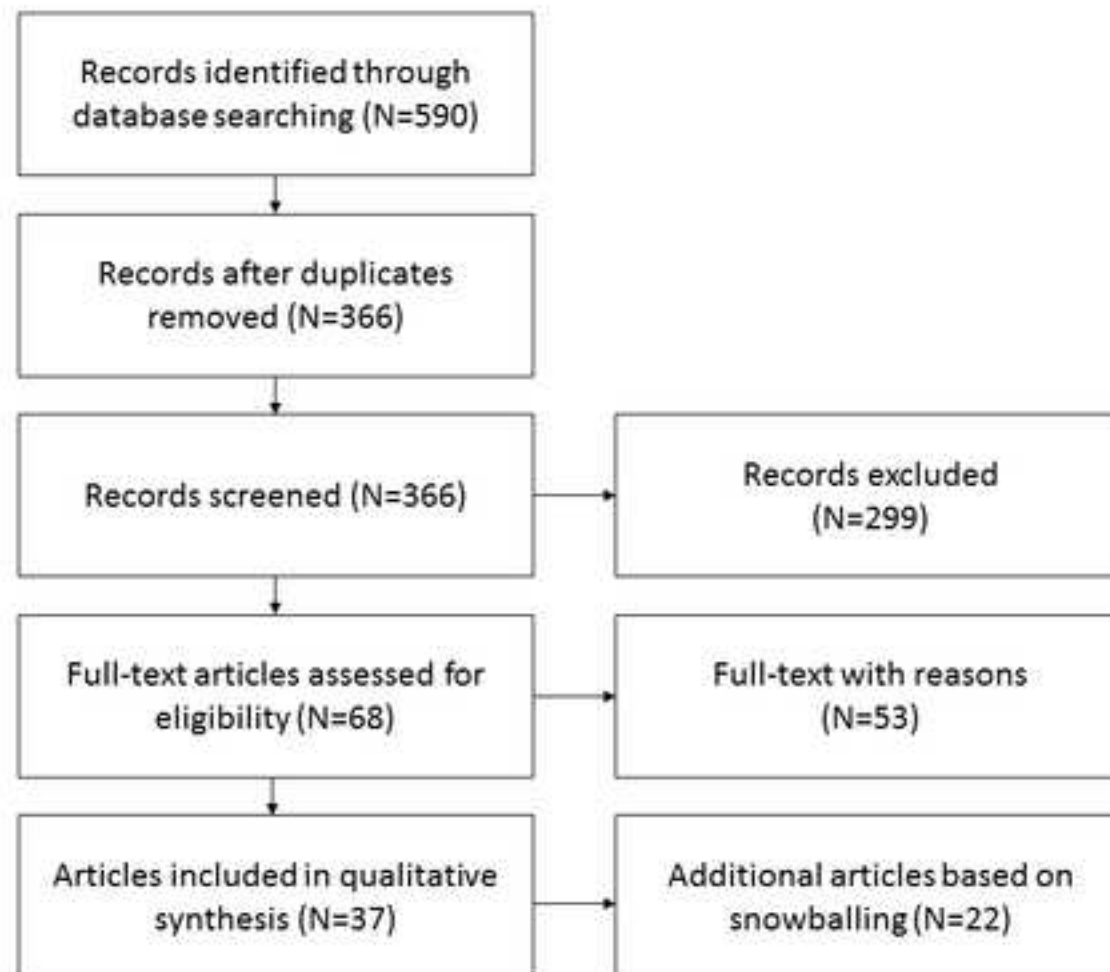

Figure 1 Flow chart demonstrating the search string

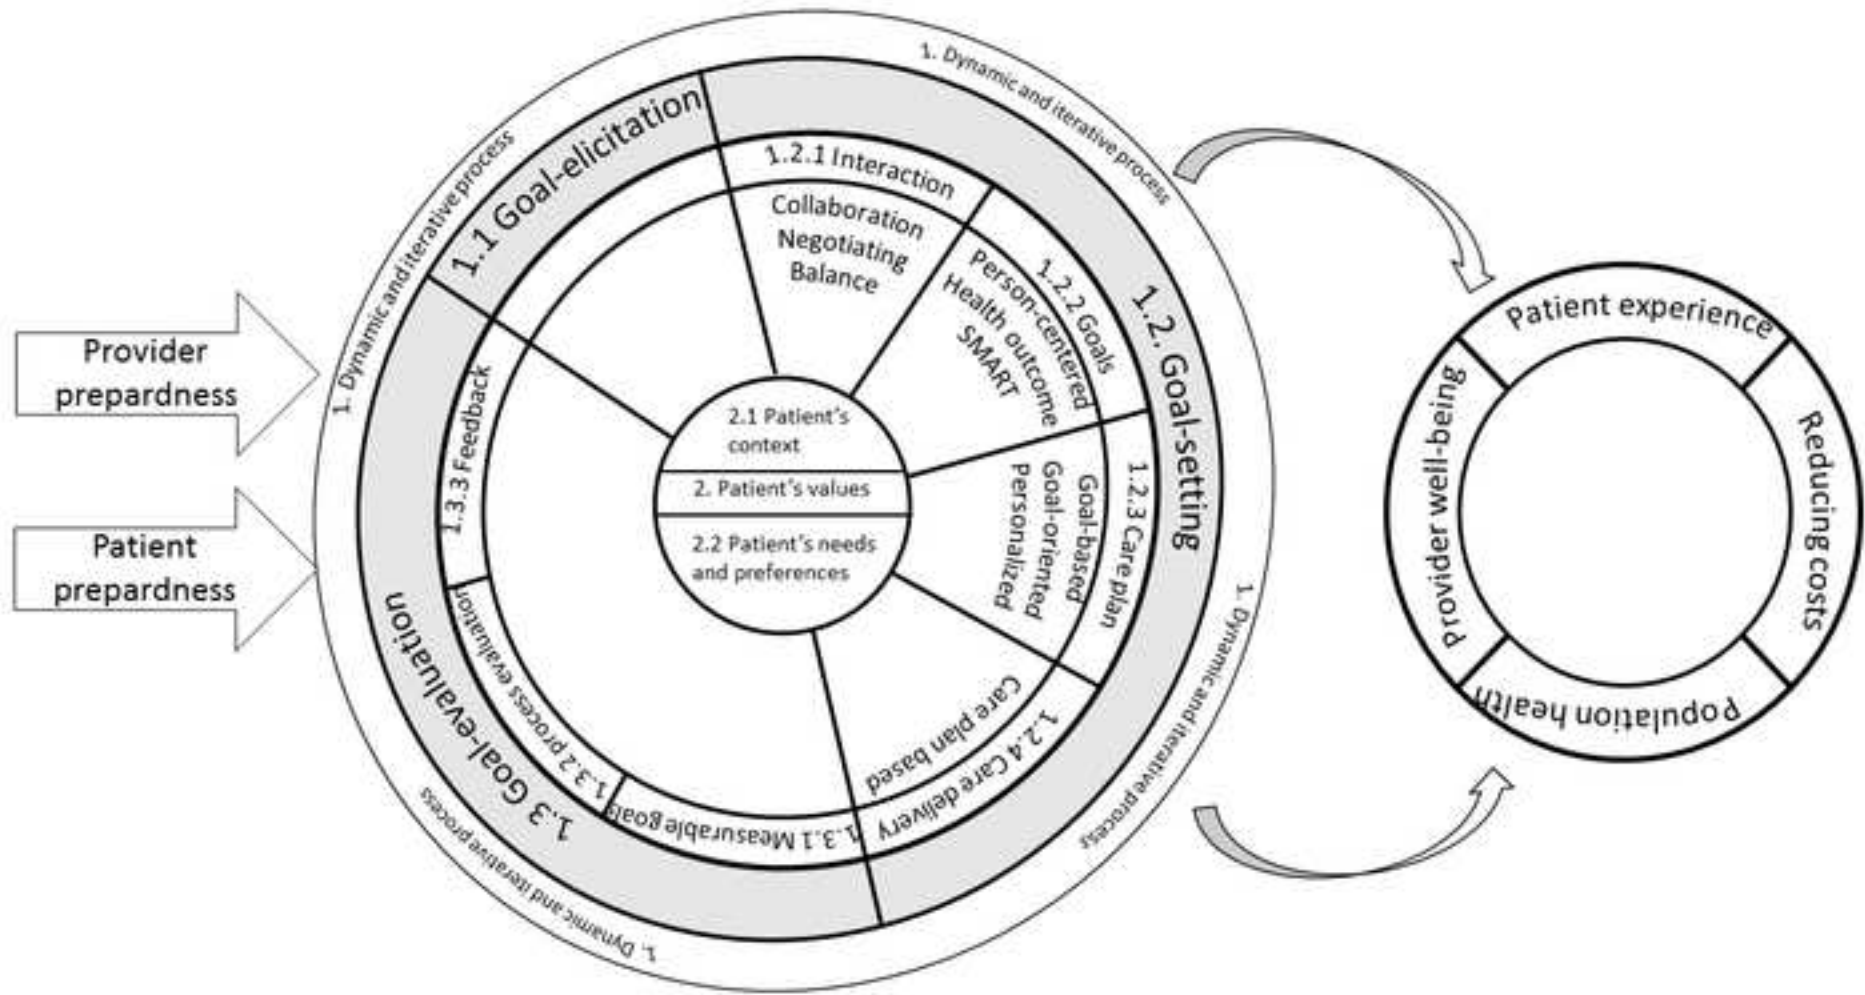

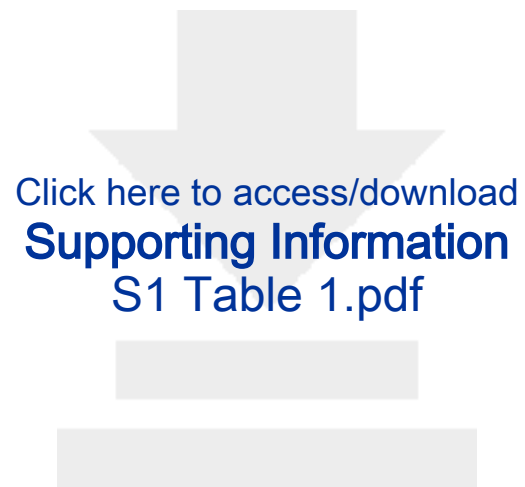

Click here to access/download  
**Supporting Information**  
S1 Table 1.pdf

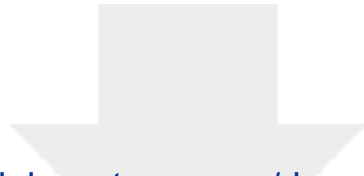

Click here to access/download  
**Supporting Information**  
S2 Table2.pdf

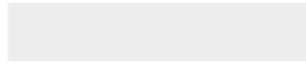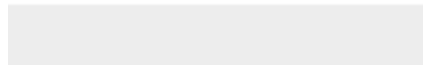

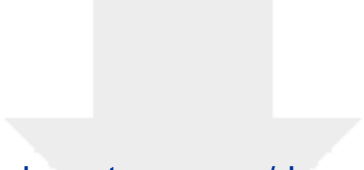

Click here to access/download  
**Supporting Information**  
S1 File.pdf



# Goal-oriented care for patients with chronic conditions or multimorbidity in primary care: a scoping review and concept analysis.

Dagje Boeykens <sup>12¶\*</sup>, Pauline Boeckstaens <sup>2¶</sup>, An De Sutter <sup>2</sup>, Lies Lahousse <sup>3</sup>, Peter Pype <sup>2,4,5</sup>, Patricia De Vriendt <sup>1,5,6&</sup>, Dominique Van de Velde<sup>1,5&</sup>, on behalf of the Primary Care Academy<sup>^</sup>.

1. Department of Rehabilitation Sciences, Occupational Therapy, Faculty of Medicine and Health Sciences. Ghent University. Ghent. Belgium.
2. Department of Public Health and Primary Care, Faculty of Medicine and Health Sciences. Ghent University. Ghent. Belgium.
3. Department of Bioanalysis, Faculty of Pharmaceutical Sciences, Ghent University. Ghent. Belgium.
4. End-of-Life Care Research Group, Faculty of Medicine and Health Sciences. Vrije Universiteit Brussel and Ghent University. Ghent. Belgium.
5. Department of Occupational Therapy. Artevelde University College. Ghent, Belgium.
- ~~6. Department of Gerontology and Frailty in Ageing Research Group, Faculty of Medicine and Pharmacy. Vrije Universiteit Brussel. Brussels. Belgium.~~
6. Frailty in Ageing (FRIA) Research Group, Department of Gerontology and Mental Health and Wellbeing (MENT) research group, Faculty of Medicine and Pharmacy. Vrije Universiteit Brussel. Brussel. Belgium.

\* Corresponding author: Dagje.boeykens@ugent.be

¶: These authors contributed equally to this work.

&: These authors also contributed equally to this work.



24 ^Membership of the Primary Care Academy is provided in the Acknowledgments.

## 25 **Abstract**

### 26 **Background**

27 The healthcare system is faced by an ageing population, increase in chronic conditions and  
28 multimorbidity. Multimorbid patients are faced with multiple parallel care processes leading to a risk  
29 ~~offer~~ fragmented care. These problems relate to the disease-oriented paradigm. In this paradigm the  
30 treatment goals can be in contrast with what patients value.

31 The concept of goal-oriented care is proposed as an alternative way of providing care as meeting  
32 patients' goals could have potential benefits. Though, there -There is a need to translate this concept  
33 into tangible knowledge so providers can better understand and use the concept in clinical practice.  
34 The aim of this study is to address this need by means of a concept analysis.

### 35 **Method**

36 This concept analysis using the method of Walker and Avant is based on a literature search in PubMed,  
37 Embase, Cochrane Library, PsychInfo, CINAHL, OTSeeker and Web of Science. The method provides  
38 eight iterative steps: select a concept, determine purpose, determine defining attributes, identify  
39 model case, identify additional case, identify antecedents and consequences and define empirical  
40 referents.

### 41 **Results**

42 The analysis of 37 articles revealed that goal-oriented care is a dynamic and iterative process of three  
43 stages: goal-elicitation, goal-setting, and goal-evaluation. The process is underpinned by the patient's  
44 context and values. Provider and patient preparedness are required to provide goal-oriented care.  
45 Goal-oriented care has the potential to improve patients' experiences and providers' well-being, to  
46 reduce costs, and improve the overall population health. The challenge is to identify empirical  
47 referents to evaluate the process of goal-oriented care.

48 **Conclusion**

49 A common understanding of goal-oriented care is presented. Further research should focus on how  
50 and what goals are set by the patient, how this knowledge could be translated into a tangible workflow  
51 and should support the development of a strategy to evaluate the goal-oriented process of care.

52 **Keywords**

53 goal-oriented care, goal-setting, patient-centeredness, chronic conditions, multimorbidity, [review](#),  
54 concept analysis

55

56

57

58

59

60

61

62

63

64

65

66

67

68

## 69 Introduction

70 The healthcare system is faced by an ageing population and an increase in chronic conditions and  
71 multimorbidity [1]. More and more people are forced to live with the consequences of these  
72 demographic changes and require ongoing (chronic) care on top of acute care [2]. At the same time,  
73 patient autonomy is gaining importance and patients are considered as an active and important  
74 partner in their care [3, 4]. Patients with chronic conditions are often consulting multiple health care  
75 providers [3] leading to a higher rate of encounters. They also receive a larger amount of prescriptions  
76 [5] and they are asked to complete a diverse set of self-monitoring tasks such as managing,  
77 exacerbations or monitoring biomedical targets [3]. Since patients with (multiple) chronic conditions  
78 are faced with multiple parallel care process for their different conditions, there is a considerable risk  
79 ~~offer~~ fragmented care. Especially when health-care providers focus on disease control, patients can  
80 experience lack of care continuity and issues with communication as patients themselves focus on the  
81 meaning of care and more on personal wellbeing [6, 7]. As a result, treatment goals can be in contrast  
82 with what patients value in their personal lives [3].

83 The health-care system is oriented towards a disease-oriented paradigm to which many of these  
84 problems relate [8-10]. In this paradigm, care is mainly organized according to disease-oriented  
85 guidelines [10]. This may work well for patients with a single disease, but becomes inappropriate for  
86 patients with multiple problems. The focus on single disease guidelines might distract providers from  
87 what really matters to the patient [10]. A possible way to overcome many of the challenges is to shift  
88 care back from 'what's the matter with the patient' to 'what matters to the patient'. It creates health  
89 care processes in which patients' needs are actively sought and met [9]. Meeting those patients' needs  
90 and tailoring care more to what patients want in a co-creation process could result in better social  
91 well-being, physical well-being, and satisfaction for patients and healthcare providers [11].

92 One of the possible strategies is to actively engage patients in identifying their personal goals and  
93 aligning care to those goals, which could be achieved by goal-oriented care [12].

94 The concept of goal-oriented care has been launched and mentioned for the first time in 1991 by Mold  
95 who proposed the concept as an alternative way of providing care [13]. [4] Later on, in 2012, Reuben  
96 and Tinetti took the concept of goal-oriented care a step forward by stating that care “must above all  
97 consider patients’ preferred outcomes” [10]. The focus on setting goals based on the patients’ needs  
98 and preferences rather than on health-related outcomes became one of the main novelties in chronic  
99 disease management [4]. Not only could goal-oriented care be proposed as an important paradigm to  
100 overcome some of the new challenges for chronic patients [9], it might also corresponded to the  
101 original concept of evidence based medicine (EBM) [14]. EBM was first published by Sackett in 1996  
102 who described three key components: 1. best external evidence, 2. individual clinical expertise, and 3.  
103 patients’ values and expectations [14]. Since the first description of EBM, multiple approaches and  
104 paradigms has been developed to compromise between those three components [15]. For example,  
105 patient-centered care (PCC), which is already a well-known and widely used concept, is defined as  
106 “providing care that is respectful of, and responsive to individual patient preferences, needs, and  
107 values and ensuring that patients values guide all clinical decisions” [15]. Shared-decision making, on  
108 the other hand, also strives to share evidence and engage patients in care as it is “an approach where  
109 clinicians and patients share the best available evidence when faced with the task of making decisions,  
110 and where patients are supported to consider options, and to achieve informed preferences” [16].  
111 Goal-oriented care is proposed as a promising healthcare paradigm and approach to operationalize  
112 EBM and return to where it all started [10]. However, in contrast to the other approaches and  
113 paradigms, goal-oriented care is ill defined. Developing a common understanding on the concept could  
114 potentially contribute to the clarification and in-depth comparison between the related concepts and  
115 eventually lead to better use in clinical practice. However, some healthcare providers might already  
116 assume that they practice goal-oriented care spontaneously, but there still is a lack of underpinning  
117 knowledge and guidance on how to provide goal-oriented care to patients. The main pitfall in most of  
118 these goal-setting activities is that the goals are not necessarily related to the patients’ needs and  
119 preferences while in goal-oriented care these patients’ needs and preferences are put on the forefront

120 and are not necessarily health-related. [17, 18]. From this perspective, goal-setting and goal-oriented  
121 care should be taken together and focus on the patients' needs and preferences.

122 As a first step in exploring the potential of goal-oriented care in chronic care, it is important to gain in-  
123 depth knowledge on what goal-oriented care is about and how it can be generally described.

124 As goal-oriented care could be well-suited in primary care, as this context is often the linchpin for  
125 patients with chronic conditions, this will be the focus of this study [19]. This study aimed to describe  
126 a structured approach to deepen the concept of goal-oriented care for patients with chronic conditions  
127 or multimorbidity in the primary care context. ~~It has been suggested to contribute to patients'~~  
128 wellbeing and quality of life [17]. ~~Goal-oriented care as a new paradigm of care has the potential to~~  
129 overcome some of the new challenges for chronic patients [9].

130 Primary care is often the linchpin of care for these patients [19]. ~~It is easy accessible care in which~~  
131 providers address a large majority of health and social needs and develop sustained partnerships with  
132 patients in their community [20, 21]. ~~Primary care offers a first contact point for new health needs,~~  
133 provides care continuity and care coordination in ongoing and complex cases [22]. ~~The aim of this study~~  
134 is to address these knowledge gaps by means of a concept analysis to clarify the existing ambiguity and  
135 make an overview of the already existing knowledge. Clarity on the concept of goal-oriented care will  
136 enhance the understanding and will (potentially) facilitate the implementation of goal-oriented care  
137 interventions.

138 Although many primary care providers assume they practice goal-oriented care spontaneously, there is  
139 a lack of underpinning knowledge and guidance on how to provide goal-oriented care to patients [17,  
140 18]. There is an urgent need to translate the paradigm of goal-oriented care into tangible knowledge  
141 so providers can better understand and use this concept in clinical practice. The knowledge gap on  
142 goal-oriented care is not only characterized by a lack of in-depth knowledge of the concept. There are  
143 also related concepts (such as shared decision making [23] and patient centered care [24]) that  
144 challenge the common understanding of goal-oriented care.

145 ~~The aim of this study is to address these knowledge gaps by means of a concept analysis to clarify the~~  
146 ~~existing ambiguity and make an overview of the already existing knowledge. Clarity on the concept of~~  
147 ~~goal-oriented care will enhance the understanding and will (potentially) facilitate the implementation~~  
148 ~~of goal-oriented care interventions.~~

## 149 **Method**

150 This concept analysis aims to present an overview and **synthetization** of the existing literature  
151 regarding goal-oriented care for **chronically ill patients** in primary care. This will be performed by  
152 analyzing the concept into antecedents, attributes, and consequences following the method of Walker  
153 and Avant [25]. This method provides a framework of eight iterative steps: 1. select a concept, 2.  
154 determine the aims or purposes of analysis, 3. identify all concept definitions and select the literature,  
155 4. determine different attributes, 5. identify a model case, 6. identify an additional case, 7. identify  
156 antecedents and consequences, and 8. define empirical referents [25]. In this concept analysis the  
157 attributes are the heart and will present the characteristics of goal-oriented care and allow the  
158 broadest insight into the concept [25].

### 159 **Step 1: select a concept**

160 Goal-oriented care has been defined as an underpinning strategy for primary care reform in Flanders,  
161 Belgium. The concept is presented as one of the main topics of 'The Primary Care Academy' (PCA). The  
162 PCA is a consortium consisting of four universities (Ghent University, University of Antwerp, Catholic  
163 university of Leuven, Vrije Universiteit of Brussels), six universities of applied sciences (UAC VIVES, UAC  
164 Artevelde, UAC Ghent, UAC Leuven-Limburg, UAC Karel de Grote, UAC Thomas More), and important  
165 stakeholders (Flemish Patient Platform and White-Yellow Cross; a home care organization) in Belgium  
166 with the aim to strengthen **the primary care organization and delivery**. The PCA includes experts in  
167 primary care from a variety of healthcare and welfare disciplines. Discussions in the research group  
168 working on goal-oriented care created a necessity to clarify the concept.

169 **Step 2: determine the aims and purposes of the analysis**

170 The aim of this concept analysis is to build a common understanding to eliminate ambiguity between  
171 the concepts related to goal-oriented care. Specifically, the scope of the concept analysis is to define  
172 goal-oriented care for people with chronic conditions at the level of primary care.

173 **Step 3: select the literature**

174 The literature search was conducted between January 2020 and April 2020. As the method of a concept  
175 analysis does not specify how the literature search has to be performed, this search was based on the  
176 method of a scoping review described by Levac (2010) [26]. A preliminary combination of search terms  
177 was identified: 'goal-oriented care', 'chronic care' and 'primary care'. Based on these keywords a first  
178 search was performed to identify adjacent terms in the literature. The search strategy was revised in  
179 consultation with the librarian of the university and the senior researchers. The definitive keywords  
180 were: 'goal-oriented care', 'goal-oriented medical care', 'person-centered goal-setting', 'patient-  
181 centered goal-setting', 'goal-oriented patient care' and 'patient priorities', emphasized goal-oriented  
182 care and its synonyms. Related concepts such as patient-centered care, value-based care, etc. were not  
183 included as the method of concept analysis prescribes to deepen all the attributes of one concept. In  
184 a first phase, the keywords were entered in PubMed, Embase and Cochrane Library (Table 1). In a  
185 second phase, CINAHL, OTSeeker, PsycINFO and Web of Science were consulted and confirmed the  
186 first results as no new studies were identified.

187

188

189

190

191

Table 1. Overview of the search strings.

Formatted: English (United States)

**PubMed**

(goal-directed care[MeSH Terms]) OR goal-oriented care [Title/abstract]) OR goal-oriented medical care [Title/abstract]) OR person-centered goal-setting [Title/abstract]) OR patient centered goal-setting [Title/abstract]) OR goal-oriented patient care[Title/abstract]) OR patient priorities [Title/abstract])

**Embase**

'goal-oriented care':ab,ti OR 'goal-oriented medical care':ab,ti OR 'person-centered goal-setting':ab,ti OR 'patient centered goal-setting':ab,ti OR 'goal-oriented patient care': ab,ti OR 'patient priorities':ab,ti

**Cochrane**

goal-oriented care in Title Abstract Keyword OR goal-oriented medical care in Title Abstract Keyword OR person-centered goal-setting in Title Abstract Keyword OR patient-centered goal-setting in Title Abstract Keyword OR goal-oriented patient care OR patient priorities in Title Abstract Keyword - (Word variations have been searched)

Formatted: Left, None, Space After: 8 pt, Line spacing: Double, Pattern: Clear

Articles resulting from this search were put in Rayyan [27] to administer the data. A first selection based on title and abstract was performed with regard to the predefined in- and exclusion criteria. Inclusion criteria: (a) goal-oriented care as a health-related concept, (b) mentioning goal-setting, goal-oriented care or related concept (e.g. person-centered integrated care), and (c) focusing on patients with one or more chronic conditions, a chronic condition or multimorbidity. Exclusion criteria: (a) focusing on single-disease management, (b) goals regarding disease-specific outcomes (e.g. cancer or diabetes), and (c) focusing on goal-oriented care in a specific context (e.g. rehabilitation center), and (d) specifically mentioning patient-centered care, shared-decision making, etc. as they will hamper the understanding of specifically goal-oriented care. Articles resulting from this first search were subjected to a full text screening based on the initial criteria and: (a) full text available, (b) written in English, (c)



214 referring to goal-oriented care or related concepts as a concept, and (d) containing information of a  
 215 theoretical building of a definition. There was no restriction by study design to gain as much insight in  
 216 goal-oriented care from different data sources.

217 **Step 4: defining the attributes**

218 The determination of the attributes started with a discussion of four key articles [1, 6, 28, 29] selected  
 219 by the first author based on the divers approaches of goal-oriented care and presented to the research  
 220 group. Similar to a qualitative, thematic analysis, the key articles were analyzed based on an open  
 221 coding and then grouped into codes ~~These key articles were analyzed~~ (Table 2 – example of data  
 222 analysis). These codes were then presented to and discussed with the co-authors. In these discussion  
 223 rounds, codes were translated into attributes. ~~deconstructed into codes and discussed with the entire~~  
 224 ~~research group resulting in a first overview of attributes of goal-oriented care.~~ In a second phase, new  
 225 articles were added and analyzed based on the same method as the key articles until all relevant  
 226 literature (based on the inclusion criteria) was included. The different codes were put into NVIVO12 to  
 227 synthesize the data and to initiate further discussion with the research group. This resulted in the final  
 228 attributes (Table 4). The method starting from reading the first article to defining the attributes was  
 229 characterized by an iterative process in which the attributes were reformulated until consensus with  
 230 the research group was reached.

231 Table 2. Example of analysis process of the study of, Bernsten et al. 2018.

| <u>Extract from article</u>                                                                                                                                        | <u>Code</u>                                                  | <u>Attribute</u>                                    |
|--------------------------------------------------------------------------------------------------------------------------------------------------------------------|--------------------------------------------------------------|-----------------------------------------------------|
| <u>...A professional and a personal goal clashes in a decision process regarding the discontinuation of a medication the informant had been using for years...</u> | <u>Negotiation goals between professionals and patients.</u> | <u>Goal-setting – patient-provider interaction</u>  |
| <u>... However “What matters to you?” gave a richer and more immediate insight into areas threatened by health issues...</u>                                       | <u>Patient centeredness</u>                                  | <u>Tailoring to patients’ needs and preferences</u> |

- Formatted: English (United States)
- Formatted: English (United States)
- Formatted: English (United States)
- Formatted: Caption, Keep with next
- Formatted: English (United States)
- Field Code Changed
- Formatted: Font: Bold
- Formatted Table

...Goal evaluation serves as feedback to all contributors in the seamless care process... The result should be documented and linked back to goal adjustment and learning for the next cycle... Feedback to the care process Goal-evaluation

232 **STEP 5: identify a model case, a contrary case, and a borderline**

233 ~~case, IDENTIFY A MODEL CASES, A CONTRARY CASE AND A~~

234 ~~BORDERLINE CASE~~

235 A model case is presented as a narrative of how goal-oriented care could be conceptualized and  
236 illustrates all defined attributes of goal-oriented care [25]. A contrary and borderline case differ from  
237 this model case and do not include all of the attributes and/or differ in one of them.

238 **Step 6: identify antecedents and consequences**

239 Antecedents are events or incidents that precede the process of applying goal-oriented care.  
240 Consequences are those events or incidents as a result of applying goal-oriented care [25].  
241 The antecedents and consequences were searched simultaneously with the attributes (step 4). Results  
242 have been discussed by the entire research group until consensus was reached.

243 **Step 7: define empirical referents**

244 Empirical referents provide an overview of the identified assessment tools related to the attributes  
245 aiming to make the concept, goal-oriented care, measurable. These assessment tools may be seen as  
246 the underpinning needs and characteristics when developing an evaluation method of goal-oriented  
247 care.

248

249

Formatted: Font: 16 pt, Bold

Formatted: Font: 16 pt, Bold

Formatted: Font: 16 pt, Bold

## 250 **Results**

### 251 **Step 1-3**

252 A first search based on the predefined terms (Table 1) resulted in 590 articles; 82 from Cochrane  
253 Library, 188 from Embase, and 313 from PubMed. After removing the duplicates, 366 articles were  
254 screened by title and abstract yielding 68 articles. A full text screening of these 68 articles lead to 15  
255 articles that fitted the predefined in- and exclusion criteria (step 3). Based on the snowballing method  
256 of adding new articles based on references, citations, and similar articles 22 additional articles were  
257 added. This resulted in a total of 37 articles (Fig. 1 and Table 3) that were selected for the full text  
258 analysis. These articles represented a broad range of study types: 4 systematic reviews, 4 experimental  
259 studies (e.g. randomized controlled trial), 13 qualitative studies, 3 survey studies, 1 concept analysis,  
260 1 methodology paper, 4 reviews, 2 position papers, 1 background paper, 1 status report, 1  
261 commentary, 1 opinion paper, and 1 perspective.

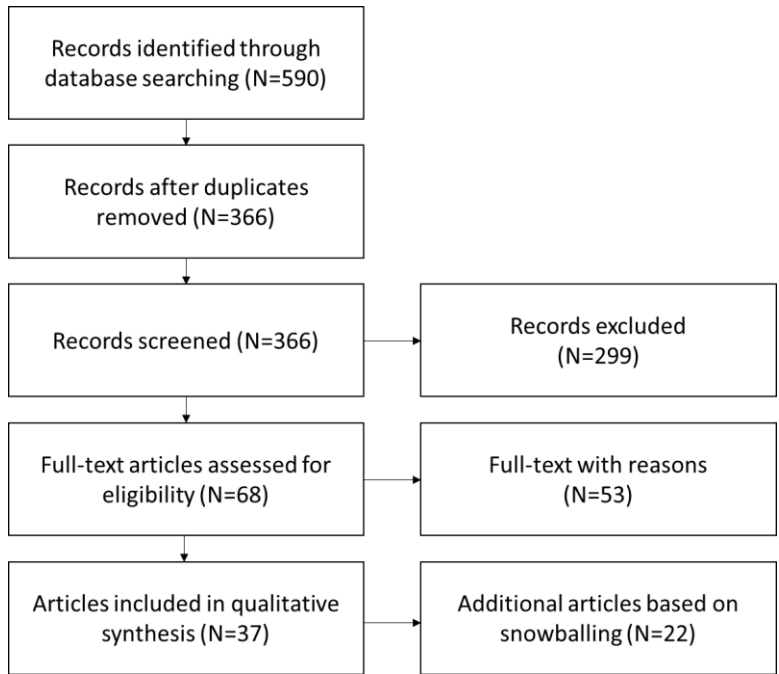

Fig. 1 Flow chart demonstrating the search string.

273

274

275

| Papers identified based on full text screening |      |                                                                              |                                                                                                                                                                                                                                      |                                                                                                                                                                                                                                                                                                                                                                                                                        |
|------------------------------------------------|------|------------------------------------------------------------------------------|--------------------------------------------------------------------------------------------------------------------------------------------------------------------------------------------------------------------------------------|------------------------------------------------------------------------------------------------------------------------------------------------------------------------------------------------------------------------------------------------------------------------------------------------------------------------------------------------------------------------------------------------------------------------|
| No.                                            | Year | Authors                                                                      | Title                                                                                                                                                                                                                                | Study design + method                                                                                                                                                                                                                                                                                                                                                                                                  |
| 1                                              | 1991 | Mold, Blake, Lorne, Becker [13]                                              | Goal-oriented medical care.                                                                                                                                                                                                          | Position paper                                                                                                                                                                                                                                                                                                                                                                                                         |
| 2                                              | 2011 | De Maeseneer, Boeckxstaens [30]                                              | Care for non-communicable diseases (NCD's): time for a paradigm-shift.                                                                                                                                                               | Opinion paper                                                                                                                                                                                                                                                                                                                                                                                                          |
| 3                                              | 2012 | Reuben, Tinetti [10]                                                         | Goal-oriented patient care- an alternative health outcomes paradigm.                                                                                                                                                                 | Perspective                                                                                                                                                                                                                                                                                                                                                                                                            |
| 4                                              | 2014 | Bayliss, Bonds, Boyd, Davis, Finke, Fox, Stange [31]                         | Understanding the context of health for persons with multiple chronic conditions: moving from what is the matter to what matters.                                                                                                    | Forty-five experts met to critically consider four aspects of incorporating context into research on multiple chronic conditions.                                                                                                                                                                                                                                                                                      |
| 5                                              | 2014 | Kramer, Bauer, Dicker, Durusu-Tranriover, Ferreira, Rigby, van Hulsteijn [8] | The changing face of internal medicine: patient- centered care.                                                                                                                                                                      | Position paper                                                                                                                                                                                                                                                                                                                                                                                                         |
| 6                                              | 2015 | Bernsten, Gammon, Steinsbekk, Salamonsen, Foss, Ruland, Fonnebo [32]         | How do we deal with multiple goals for care within an individual patient trajectory? A document content analysis of health service research papers on goals for care.                                                                | Document content analysis of seventy health service research papers on the topic of 'goals of care'.                                                                                                                                                                                                                                                                                                                   |
| 7                                              | 2016 | Blom, Elzen, Houwelingen, Heijmans, Stijnen, Van Den Hout, Gussekloo [33]    | Effectiveness and cost-effectiveness of a proactive, goal-oriented, integrated care model in general practice for older people. A cluster randomized controlled trial: integrated systematic care for older people-the ISCOPE study. | Cluster randomized controlled trial –intervention group: general practitioners made an integrated care plan using functional geriatric approach; control group: care as usual; 59 general practices were included (30 intervention, 29 control); outcome measures on quality of life, activities of daily living, satisfaction with delivered healthcare, and cost-effectiveness of the intervention 1-year follow-up. |

|    |      |                                                                           |                                                                                                                                                                      |                                                                                                                                                                                                                                                                                                           |
|----|------|---------------------------------------------------------------------------|----------------------------------------------------------------------------------------------------------------------------------------------------------------------|-----------------------------------------------------------------------------------------------------------------------------------------------------------------------------------------------------------------------------------------------------------------------------------------------------------|
| 8  | 2016 | Boeckstaens, Willems, Lanssens, Decuyper, Brusselle, Kühlein, Sutter [34] | A qualitative interpretation of challenges associated with helping patients with multiple chronic diseases identify their goals.                                     | Qualitative research – qualitative interviews with nineteen patients diagnosed with chronic, obstructive pulmonary disease and comorbidities to explore goal-setting in patients with multimorbidity.                                                                                                     |
| 9  | 2016 | Mangin, Stephen, Bismah, Risdon [35]                                      | Making patient values visible in healthcare: a systematic review of tools to assess patient treatment priorities and preferences in the context of multimorbidity.   | Systematic review – data sources: Medline, Embase, Cochrane databases; citations were included if they reported a tool to use a record patient priorities or preferences for treatment, and quantitative or qualitative results following administration of the tool.                                     |
| 10 | 2016 | Schimdt, Babac, Pauer, Damm, von der Schulenberg [36]                     | Measuring patients priorities using the Analytic hierarchy process in comparison with best-worst scaling and rating cards: methodological aspects and ranking tasks. | Analysis of the results of non-standardized Analytic Hierarchy Process (AHP) for different consistency ration threshold, aggregation methods, and sensitivity analysis; comparison of rankings criteria of AHP with best-worst-scaling and ranking cards results by Kendall's tau b.                      |
| 11 | 2016 | Tinetti, Esterson, Ferris, Posner, Blaum [1]                              | Patient priority-directed decision making and care for older adults with multiple chronic conditions.                                                                | Review                                                                                                                                                                                                                                                                                                    |
| 12 | 2018 | Bernsten, Hoyem, Lettrem, Rul, Rumpfeld, Gammon [6]                       | A person-centered integrated care quality framework, based on qualitative study of patient's evaluation of care in light of chronic care ideals.                     | Qualitative evaluative review of the individual patient pathways experiences of nineteen strategically chosen persons with multimorbidity.                                                                                                                                                                |
| 13 | 2019 | Feder, Kiwak, Costello, Dindo, Hern, Bigos, Naik [3]                      | Perspective of patients in identifying their values-based health priorities.                                                                                         | Qualitative study using in-depth semi structured telephone and in-person interviews; open-ended questions about patient perceptions of the patient health priorities identification process, perceived benefits of the process, enables and barriers to PHPI, and recommendation for process enhancement. |
| 14 | 2019 | Franklin, Lewis, Willis, Roger,                                           | Controlled, constrained or flexible? How self-management goals are shaped by patient-provider interactions.                                                          | Conversation analysis; observations of consultations for chronic care management between patients and their health professionals.                                                                                                                                                                         |

|                                       |      | Venville, Smith [37]                                                   |                                                                                                                                     |                                                                                                                                                                                                                                                                                                                                                                                                                                                                               |
|---------------------------------------|------|------------------------------------------------------------------------|-------------------------------------------------------------------------------------------------------------------------------------|-------------------------------------------------------------------------------------------------------------------------------------------------------------------------------------------------------------------------------------------------------------------------------------------------------------------------------------------------------------------------------------------------------------------------------------------------------------------------------|
| 15                                    | 2019 | Tinetti, Dindo, Smith, Blaum, Costello, Ouellet, Naik [38]             | Challenges and strategies in patient's health priorities-aligned decision-making for older adults with multiple chronic conditions. | Participant observation qualitative study – clinicians followed a training and had experiences in providing patient priorities care (PPC), clinicians and PPC implementation team participated in 21 case-based, group discussions. Using emergent learning, participants discussed challenges, posed solutions, and worked together to determine how to align care options with the health priorities of 35 patients participating in the patient priorities care pilot.     |
| Papers identified through snowballing |      |                                                                        |                                                                                                                                     |                                                                                                                                                                                                                                                                                                                                                                                                                                                                               |
| No.                                   | Year | Authors                                                                | Title                                                                                                                               | Study design                                                                                                                                                                                                                                                                                                                                                                                                                                                                  |
| 16                                    | 2006 | Hurn, Kneebone, Cropley [39]                                           | Goal setting as an outcome measure: a systematic review                                                                             | Systematic review – data sources included a computer-aid literature search of studies examining the reliability, validity, and sensitivity of goal-setting/ goal-attainment scaling, with snowballing.                                                                                                                                                                                                                                                                        |
| 17                                    | 2009 | Bodenheimer, Handley [40]                                              | Goal-setting for behavior change in primary care: an exploration and status report.                                                 | Exploration and Status report – literature search on goal-setting interventions for promoting behavior change; resulting in eight articles.                                                                                                                                                                                                                                                                                                                                   |
| 18                                    | 2011 | Junius-Walker, Stolberg, Steinke, Theile, Hummers-Pradier, Dierks [41] | Health and treatment priorities of older patients and their general practitioners: a cross-sectional study.                         | Cross-sectional study – 123 older patients and 11 general practitioners evaluated the importance and severity of patients' individual health problems. Patients received a geriatric assessment, then GPS rated the importance and components of severity of each problem; assessing proportion of important problems and the chance corrected agreement; multilevel logistic regression models were used to relate the importance of a problem with its severity components. |

|    |      |                                                                                   |                                                                                                                                                                                                                                                  |                                                                                                                                                                                                                                                                                               |
|----|------|-----------------------------------------------------------------------------------|--------------------------------------------------------------------------------------------------------------------------------------------------------------------------------------------------------------------------------------------------|-----------------------------------------------------------------------------------------------------------------------------------------------------------------------------------------------------------------------------------------------------------------------------------------------|
| 19 | 2012 | Rijken, Bekkema, Boeckstaens, Schellevis, De Maeseneer, Groenewegen [2]           | Chronic disease management programs: an adequate response to patients' needs?                                                                                                                                                                    | Survey among country-experts resulting in information about existing disease management programs; in addition scientific literature.                                                                                                                                                          |
| 20 | 2014 | Lenzen, Daniëls, van Bokhoven, der Weijden, Beurskens [42]                        | Setting goals in chronic care: shared decision making as self-management support by the family physician.                                                                                                                                        | Background paper to contribute to the understanding of goal-setting within self-management and to identify elements that need further development for practical use.                                                                                                                          |
| 21 | 2016 | Steel Gray, Wodchis, Upshur, Cott, McKinstry, Mercer, Palen, Ramsay, Thavorn [43] | Supporting goal-oriented primary health care for seniors with complex care needs using mobile technology: evaluation and implementation of the health system performance research network, Bridgepoint electronic patient reported outcome tool. | Pragmatic cluster randomized controlled trial – intervention groups using ePRO tool compared with control groups on measure of quality of life, patient experience, and cost-effectiveness; evaluating of tool.                                                                               |
| 22 | 2017 | Kangovi, Mitra, Smith, Kulkarni, Turr, Huo, Glanz, Grande, Long [44]              | Decision-making and goal-setting in chronic disease management: baseline findings of a randomized controlled trial.                                                                                                                              | Randomized controlled trial – patients used low-literacy aid to prioritize one of their chronic conditions and then set a goal for that condition with their primary care provider; patients created patient-driven action plans for reaching these goals.                                    |
| 23 | 2017 | Mold [45]                                                                         | Goal-directed health care: redefining health and health care in the era of value-based care.                                                                                                                                                     | Review                                                                                                                                                                                                                                                                                        |
| 24 | 2017 | Schellinger, Anderson, Frazer, Cain [46]                                          | Patient self-defined goals: essentials of person-centered care for serious illness.                                                                                                                                                              | Descriptive qualitative analysis – initial inquiry to describe self-defined goals patients living with advanced heart failure, cancer, and dementia; goals were entered in electronic health record flow sheet using patients' quotes; analysis of 160 flow sheets with a deductive approach. |
| 25 | 2017 | Vermunt, Harmsen, Elwyn, Westert, Burgers, Rikkert, Faber [47]                    | A three-goal model for patients with multimorbidity: a qualitative approach.                                                                                                                                                                     | Qualitative study – qualitative interviews with general practitioners and clinical geriatricians and analyzed following a thematic approach.                                                                                                                                                  |



|    |      |                                                                                              |                                                                                                               |                                                                                                                                                                                                                                                                                                                                                                                                                                                                                                                                                                                                                                                                                                                                                                                                                                    |
|----|------|----------------------------------------------------------------------------------------------|---------------------------------------------------------------------------------------------------------------|------------------------------------------------------------------------------------------------------------------------------------------------------------------------------------------------------------------------------------------------------------------------------------------------------------------------------------------------------------------------------------------------------------------------------------------------------------------------------------------------------------------------------------------------------------------------------------------------------------------------------------------------------------------------------------------------------------------------------------------------------------------------------------------------------------------------------------|
| 26 | 2017 | Vermunt, Harmsen, Westert, Rikkert, Faber [17]                                               | Collaborative goal setting with elderly patients with chronic disease or multimorbidity: a systematic review. | Systematic review based on EPOC, PRISMA and MOOSE guidelines; Pubmed, PsychInfo, CINAHL, Web of Science, Embase, Cochrane Central Register of Controlled Trials were searched systematically; eligibility criteria: 1) Randomized (cluster) controlled trials, non-randomized controlled trials, controlled before-after studies, interrupted time series or repeated measures study design; 2) Single intervention directed specifically at collaborative goal setting or health priority setting or a multifactorial intervention including these elements; 3) Study population of patients with multimorbidity or at least one chronic disease (mean age $\pm$ standard deviation (SD) incl. age 65). 4) Studies reporting on outcome measures reducible to outcomes for collaborative goal setting or health priority setting. |
| 27 | 2018 | Kessler, Walker, Sauv -Schenk, Egan [29]                                                     | Goal setting dynamics that facilitate or impede a client-centered approach.                                   | Conversation analysis on goal-setting conversations; purposively selected from a pilot randomized controlled trial of OPC-stroke                                                                                                                                                                                                                                                                                                                                                                                                                                                                                                                                                                                                                                                                                                   |
| 28 | 2018 | Naik, Dindo, Van Liew, Hundt, Vo, Hernandez-Bigos, Esterson, Geda, Rosen, Blaum, Tinetti [4] | Development of a clinically feasible process for identifying individual health priorities.                    | Prospective development and feasibility study – development team of patients, caregivers, clinicians using a user-centered design to develop and refine value-based patient priorities care process and medical record template; descriptive statistics and qualitative analysis of barriers and enablers.                                                                                                                                                                                                                                                                                                                                                                                                                                                                                                                         |
| 29 | 2019 | De Groot, Sch nrock-Adema, Zwart, Damoiseaux, Jaarsma, Mol, Bombeke [48]                     | Learning from patients about patient-centeredness: a realist review: BEME guide No.60                         | Realist review – realist review approach; literature search in scoping phase, deductive and inductive coding to extent rough program theory.                                                                                                                                                                                                                                                                                                                                                                                                                                                                                                                                                                                                                                                                                       |

|    |      |                                                                                                               |                                                                                                                                                                        |                                                                                                                                                                                                                                                                                                                                                                              |
|----|------|---------------------------------------------------------------------------------------------------------------|------------------------------------------------------------------------------------------------------------------------------------------------------------------------|------------------------------------------------------------------------------------------------------------------------------------------------------------------------------------------------------------------------------------------------------------------------------------------------------------------------------------------------------------------------------|
| 30 | 2019 | Kuluski, Guilcher [49]                                                                                        | Towards a person-centred learning health system: understanding value from the perspectives of patients and caregivers.                                                 | Commentary; call to action to combine the tenets from person-centered care, value-based healthcare, and learning health systems.                                                                                                                                                                                                                                             |
| 31 | 2019 | Kuluski, Peckham, Gill, Gagnon, Wong-Cornall, McKillop, Parsons, Sheridan [9]                                 | What is important to older people with multimorbidity and their caregivers? Identifying attributes of person centered care from the user perspective.                  | Qualitative descriptive study; 1-1 interviews semi-structured interviews with 172 patients and caregivers from 9 community based primary healthcare.                                                                                                                                                                                                                         |
| 32 | 2019 | Reuben, Jennings [12]                                                                                         | Putting goal-oriented patient care into practice.                                                                                                                      | Review                                                                                                                                                                                                                                                                                                                                                                       |
| 33 | 2019 | Salter, Shiner, Lenaghan, Murdoch, Ford, Winterburn, Steel [28]                                               | Setting goals with patients living with multimorbidity: qualitative analysis of general practice consultations.                                                        | Qualitative analysis of general practice consultations – analysis of video recorded doctor-patient interactions; focus groups to identify core challenges of goal-setting.                                                                                                                                                                                                   |
| 34 | 2019 | Tinetti, Naik, Dindo, Costello, Esterson, Geda, Rosen, Hernandez-Bigos, Smith, Ouellet, Kang, Lee, Blaum [50] | Association of patient priorities-aligned decision-making with patient outcomes and ambulatory health care burden among older adults with multiple chronic conditions. | Nonrandomized clinical trial with propensity adjustment conducted at one patient priorities care (PPC) and one usual care; participants included 163 adults aged 65 years or older who had three or more chronic conditions care for by ten primary care practitioners (PCP) trained in PPC and 203 similar patients who received usual care from 7 PCPs not trained in PPC. |
| 35 | 2020 | Eckhoff, Weiss [51]                                                                                           | Goal-setting: a concept analysis                                                                                                                                       | Concept analysis – method of Walker and Avant, articles and book chapters were reviewed from Cumulative Index to Nursing and Allied Health Literature, Education Resources Information Center, Psych Index.                                                                                                                                                                  |
| 36 | 2020 | Purkiple, Nagyaldi, Todd, Mold [52]                                                                           | Physician's response to patient's quality-of-life goals.                                                                                                               | Randomized controlled trial – patients were given a previsit questionnaire that included quality of life questions; physicians in the control were given no further prompting; intervention physicians were prompted to ask quality of life questions; a two-                                                                                                                |

|    |      |                                                                        |                                                                                                                                          |                                                                                                                                                                                                                                                                                                                                                                                                                         |
|----|------|------------------------------------------------------------------------|------------------------------------------------------------------------------------------------------------------------------------------|-------------------------------------------------------------------------------------------------------------------------------------------------------------------------------------------------------------------------------------------------------------------------------------------------------------------------------------------------------------------------------------------------------------------------|
|    |      |                                                                        |                                                                                                                                          | pronged design was used: prepost group where three physicians participated in 5 control and 5 intervention encounters (n = 30) and a randomized group in which 11 physicians and their patients were randomly assigned to control or intervention groups (n = 30). Video recordings of the encounters were reviewed to determine if QOL goals were mentioned and if they were utilized in decision making.              |
| 37 | 2020 | Sathanpally, Sidhu, Fahami, Gillies, Kadam, Davies, Khunti, Seidu [53] | Priorities of patients with multimorbidity and of clinicians regarding treatment and health outcomes: a systematic mixed studies review. | Systematic review – MEDLINE, EMBASE, CINAHL, and Cochrane databases were searched; included studies reported health outcome and treatment priorities of adults with multimorbidity, defined as suffering from two or more chronic conditions, or of clinicians in the context of multimorbidity or both; no restriction by study design, and studies using quantitative and/or qualitative methodologies were included. |

277

278

279

280

281

282

283

284 **Step 4: attributes**

285 The systematic analysis of the 37 selected papers could identify many different attributes of goal-  
 286 oriented care (S1 Table 1). Synthesizing these attributes, goal-oriented care could be described as a  
 287 multifaceted dynamic and iterative process of care (first main attribute) underpinned by patients’  
 288 values (second main attribute). For the process of goal-oriented care five sub attributes and seven  
 289 descriptive items could be identified (Table 43). These attributes interact and cannot be interpreted  
 290 separately.

291 Table 43. Overview of attributes.

|                                                                                                                                   |                                                                                                |                                                                                                                                                      |
|-----------------------------------------------------------------------------------------------------------------------------------|------------------------------------------------------------------------------------------------|------------------------------------------------------------------------------------------------------------------------------------------------------|
| 1. Goal-oriented care is a multifaceted, dynamic and iterative process. [1, 3, 4, 6, 12, 13, 17, 28, 29, 40, 42, 43, 46, 54, 55]. | 1.1 Goal-elicitation builds a patient-provider relationship. [1, 28, 29, 45, 56]               |                                                                                                                                                      |
|                                                                                                                                   | 1.2 Goal-oriented care entails goal-setting.                                                   | 1.2.1 Patient-provider interaction guides goal-setting. [2, 4, 12, 13, 17, 28, 29, 35, 40, 42-45, 47, 49]                                            |
|                                                                                                                                   |                                                                                                | 1.2.2 Patients’ needs and preferences are the foundation of SMART formulated goals. [1-4, 6, 10, 13, 28, 29, 31, 35, 37, 41, 44, 46, 49, 50, 56, 57] |
|                                                                                                                                   |                                                                                                | 1.2.3 Care plan is based on patients’ needs and preferences. [1, 3, 4, 6, 10, 12, 13, 17, 31, 33, 35, 38]                                            |
|                                                                                                                                   |                                                                                                | 1.2.4 Care is delivered according to the care plan. [1, 6]                                                                                           |
| 1.3 Goal-evaluation is a reflexive process.                                                                                       | 1.3.1 Feedback should be given to the goals. [38, 54]                                          |                                                                                                                                                      |
|                                                                                                                                   | 1.3.2 Evaluation entails questioning how goals are being met. [12]                             |                                                                                                                                                      |
|                                                                                                                                   | 1.3.3 Goals must be measurable. [13, 33]                                                       |                                                                                                                                                      |
| 2. Goal-oriented care embraces patients’ values.                                                                                  | 2.1 Goal-oriented care must be placed in patients’ context. [3, 12, 31, 35, 42]                |                                                                                                                                                      |
|                                                                                                                                   | 2.2 Goal-oriented care must be tailored to patients’ needs and preferences. [1, 6, 28, 29, 38] |                                                                                                                                                      |

Formatted: Dutch (Belgium)

Formatted: Dutch (Belgium)

## 292 Goal-oriented care is a multifaceted, dynamic and iterative process

293 The majority of the authors presented goal-oriented care as a stepwise approach [1, 3, 4, 6, 12, 13, 17,  
294 28, 29, 40, 42, 43, 46, 54, 55]. Even though every paper defined their own approach, overall three  
295 stages could be identified: (a) goal-elicitation, (b) the actual stage of goal-setting, and (c) a reflexive  
296 goal-evaluation stage. These three stages will be further discussed.

297 Bernsten et al. [6] emphasized the dynamic and iterative characteristics of the goal-oriented process  
298 of care [6]. They described that goal-oriented care entails going back and forth between the three  
299 stages [6]. From this perspective, goals are not described as an endpoint, but they can be adjusted,  
300 discarded, modified or new goals might be set [12, 38]. This will be further discussed in the stage of  
301 goal-evaluation.

302 Overall, in the goal-oriented process of care, the patient is described as an active partner [1].  
303 Therefore, a good communication in a continuous patient-provider relationship is described to be of  
304 utmost importance [46]. In addition, goal-oriented care should be considered as care over time rather  
305 than a one-time intervention [58]. In terms of outcomes, it is not entirely clear whether goal-oriented  
306 care should focus on (a) maintaining the status quo or (b) improving the patients' situation [12].  
307 Although there is consensus that the care process is oriented to the current needed care rather than  
308 care needed in the future [1].

## 309 Goal-elicitation builds a patient-provider relationship

310 As described earlier, the overall analysis could identify goal-elicitation as the first stage in the process  
311 of goal-oriented care. In this first stage, providers are presumed to offer time and space to patients to  
312 tell their stories in order to work towards the patients' agenda [29]. Therefore, patients have to be  
313 ready and should be actively encouraged to tell their story. Tinetti and colleagues described this as  
314 'the patient's state of readiness' [1]. This first stage is considered to be essential to work towards a  
315 balanced patient-provider conversation and relation-[52, 56]. Salter et al. described this stage as a  
316 shared process between patients and providers that reinforces and further builds their relationship

Formatted: Font: 14 pt

317 [28]. This specific part of the process of goal-oriented care is also described as a mean to achieve a  
318 greater level of shared understanding and mutual commitment between the patient and the provider  
319 [45]. Specific attention to the stage of goal-elicitation is described to create a supportive context for  
320 effective goal-setting in the next stage [28].

### 321 **Goal-oriented care entails goal-setting**

Formatted: Font: 14 pt

322 Besides the goal-elicitation stage, the literature identifies a goal-setting stage. Franklin and colleagues  
323 analyzed patient-provider conversations during goal-setting and concluded that the goal-setting stage  
324 serves as a mechanism to embrace patients' needs within the social context he lives in [37]. When this  
325 process is done properly, goal-setting should support the patients to continue doing what matters  
326 most to them ~~which would help~~. ~~This would help~~ them to cope with their conditions [37]. Within this  
327 process of goal-setting different sub attributes, ~~that are considered necessary for proper goal-setting,~~  
328 could be identified. ~~that are considered necessary for proper goal-setting~~

### 329 **Patient-provider interaction guides goal-setting**

Formatted: Font: 14 pt

330 The patient-provider interaction is characterized by a patient-centered approach [28] in which goals  
331 are set in collaboration [47]. Hereby, patients and providers agree on health-related goals [2, 12, 13,  
332 40, 43, 47, 55, 59] and find common ground [58]. Tinetti et al. described the importance of considering  
333 patients as active partners in the goal-setting process [38]. Rijken et al. mentioned that patients' goals  
334 have to be discussed in a dynamic conversation continuously taking the patients' needs, preferences,  
335 and abilities into account [2].

336 To facilitate a collaborative approach it is suggested that providers emphasize the patients' narratives  
337 reflecting their lived experience [45]. ~~Next to~~ Besides a collaborative approach, negotiation is important  
338 and considered inevitable [4, 6, 28, 42, 54]. Lenzen et al. defined this as goal-negotiation, which  
339 involves discussion of any kind of problems, exploration of the patients' values, needs and capabilities,  
340 and deliberation on patients' goals [42]. In goal-negotiation, formulating and agreeing on a specific  
341 goal are important components [28].

342 ~~Since-Because~~ the goal-setting process needs to be driven by patients' needs and preferences, there  
343 seems to be a general understanding to shift the focus from the provider to the patient [29]. Different  
344 authors reported various strategies to facilitate this shift. Mold stated that the shift implies that  
345 prioritization of the individual health-related goals and the amount of effort in achieving them should  
346 be made by the individual [13]. Naik et al. stated that patients are indeed encouraged to share their  
347 priorities, but adds that providers are encouraged to align their care with the patients' health priorities  
348 [4]. More recent publications talking about goal-setting describe a circular and shared process aimed  
349 at improving the balance and power differentials in the patient-provider relationship [4, 44]. This  
350 balance can be improved by putting themselves in someone's shoes to understand the other's  
351 constraints [49].

### 352 **Patients' needs and preferences are the foundation to set goals**

Formatted: Font: 14 pt

353 One of the important challenges in our understanding of the concept of goal-oriented care is the lack  
354 of clear understanding on patient goals. Nearly all authors described that goals should be grounded on  
355 the patients' needs and preferences [1-4, 6, 28, 29, 37, 38, 44, 46, 52, 54, 58, 60, 61]. It is described  
356 that goals should be based on the context, resources and capabilities of patients [52], that they should  
357 be approved by patients [6], and that they should foremost represent what the patients want and not  
358 necessarily what the providers want [12, 46]. Other authors recommended ~~that goals should be a~~  
359 ~~combination of both the patients' goals and the providers' goals which in turn is related to goal-~~  
360 ~~negotiation the combination of patients' and providers' goals which could be related to the aspect of~~  
361 ~~goal negotiation~~ [29, 49]. ~~In conclusion, no overall understanding on the goals could be formulated.~~  
362 ~~Besides this lack in understanding, there also seems to be ambiguity about the categorization of goals.~~  
363 ~~There also seems to be some confusion in the categorization of goals.~~ Some authors emphasized that  
364 goals should contain core values of patients (e.g. the broader aspects that matter most to the patient)  
365 [1, 4]. These goals are named as 'overarching goals' [6, 12, 29, 46] leading to a broad description of  
366 the goal (e.g. I want to live in my own home as long as possible [1]) [6]. Others argued that these

367 overarching goals might not be easy to work with and describe that these goals should be broken down  
368 into sub goals (e.g. I want to walk 2 blocks without shortness of breath [1]) [6]. Goals differ for each  
369 individual and will change over time [13]. Aside from overarching goals and sub goals many of the  
370 authors mention the importance of setting SMART goals [1, 6, 28, 29, 40, 51, 54, 55, 58]. A SMART goal  
371 is created when patients and providers collaborate to untangle the goal itself, the importance of that  
372 goal is emphasized to the patient, the perceived achievability of the goal is evaluated, as well as the  
373 timing of the goal, and any supports and resources available [40]. On the meta-perspective,  
374 overarching goals are too broad to make SMART (think about the grandmother aiming to get her  
375 grandchildren from school as long as possible). Therefore they should be divided in the sub-goals (~~in~~  
376 ~~sub-goals~~ such as I need to be able to walk without being tired after 10 yards) that are specific enough  
377 to be measured.

378 In one of his first publications Mold brings in a specific discourse around the type-categorization of  
379 goals, namely that goal-oriented care should assist patients in achieving their maximum individual  
380 health potential [13], hereby making the link with health. One should however notice that health  
381 should be described from the patients' perspective; as the ability to live his life, and not as the absence  
382 of disease [1, 13]. Patients' goals are oriented towards health outcome goals. Patients hope to achieve  
383 these individual health outcomes through their health care (e.g. function, social activities, and  
384 symptom relief)[1]. Health outcome goals describe activities that promote change in physical and  
385 cognitive well-being or health [41]. Naik et al. specifically relate patient goals to the care they are  
386 willing to receive and able to perform [4].

### 387 **Care plan is based on patients' needs and preferences**

388 Many authors relate goal-oriented care to the construction of a care plan based on the patients' needs  
389 and preferences and specifically mention that these care plans should reflect the patients' personal  
390 goals that have been identified in the previous stage [1-3, 6, 12, 31, 33]. There is a consensus that the  
391 care plan should reflect the question: 'What matters to you?' [12, 38, 49, 54, 60]. Strategies to achieve

Formatted: Font: 14 pt



392 the patients' needs and preferences should be implemented in the care plan [13]. Furthermore,  
393 Bernsten and colleagues stated that the care plan might also include an interprofessional review of the  
394 goals [6]. Therefore, it is necessary to involve all providers and preferably patients' informal care-givers  
395 and family in the whole process [3, 6, 17]. In case that providers are confronted with patients' goals  
396 that are out of their own scope, they could benefit from an interprofessional review as they are  
397 enabled to discuss with and hand over to other providers with the required expertise. This could  
398 improve the coordination of the care plans between the different providers and facilitate integrated  
399 care delivery [1, 4, 35]. To guide this interprofessional review, no specification was given about which  
400 profile would be the best fit for having the lead. Vermunt et al. (2017) illustrated this as they found  
401 variation in who (e.g. GP, nurse, practice nurse, psychological wellbeing practitioner) should  
402 contribute to goal-setting [17].

403 ~~An interprofessional review of the goals might benefit the coordination of the care plans between the~~  
404 ~~different providers and facilitate integrated care delivery [1, 4, 35].~~

#### 405 **Care delivery according to the care plan**

Formatted: Font: 14 pt

406 Patients and providers should implement the care plan and translate it into care delivery. Although,  
407 little is known about how care should be delivered, it is evident that it must be in accordance with the  
408 care plan that is set up in the previous stage [6]. For this stage Tinetti et al. specifically mentioned to  
409 start the stage of care delivery by prioritizing on simple interventions in order to achieve one or more  
410 small goals to keep patients motivated [1]. This simple interventions could focus on the sub-goals  
411 described in previous paragraphs to eventually work towards the overarching goals.

#### 412 **Goal-evaluation is a reflective process**

Formatted: Font: 14 pt

413 The overall synthesis/analysis of the literature could identify goal-evaluation as the third and final  
414 stage in the process of goal-oriented care. For this stage authors described a dynamic and iterative  
415 process that allows reflection and feedback next to assessing whether and how goals have been met

416 [38, 54]. In this process goals can be redefined and adjusted. Possible reasons to adjust goals might be  
417 that goals have been too difficult to achieve or were no longer desired or relevant to the patients'  
418 situation [12]. Although many authors acknowledge the possibility and importance of goal adjustment,  
419 there is also discussion that goal-oriented processes of care requires that goals can be measured [13].  
420 Steele Gray and colleagues described the importance of qualifying and quantifying the process  
421 proceeded to achieve the goals [43]. In contrast, Salter and colleagues described that making the goals  
422 measurable could overcomplicate and distance the patient from their own goal and might therefore  
423 not be beneficial to the process of goal-oriented care [28].

#### 424 **Goal-oriented care embraces patients' values**

425 In the previous attributes, goal-oriented care is described as a dynamic and iterative process in which  
426 two underpinning values are identified [4]. Firstly, goal-oriented care must be placed in the patient's  
427 context and secondly, goal-oriented care must be tailored to the patient's needs and preferences.

#### 428 **Goal-oriented care must be placed in patients' context**

Formatted: Font: 14 pt

429 The whole goal-oriented process of care starting from goal-elicitation to goal-evaluation needs to be  
430 placed in the patient's context. According to different authors this means that the process must be  
431 tailored to the patient's situation [3, 12, 42, 60]. This does not only refer to the personal context, but  
432 also to the social and the cultural context. Therefore, this process is influenced by different contextual  
433 factors that should must be taken into account when developing the care plan [35, 42].

#### 434 **Goal-oriented care must be tailored to patients' needs and preferences**

Formatted: Font: 14 pt

435 When reviewing the attributes, it is clear that patients' needs and preferences form the common  
436 thread. The question 'What is the matter with the patient' must be retranslated to 'What matters to  
437 the patient?' [1, 6, 28, 38]. This question enables patients to tell their story and open up in which they  
438 are considered to reflect on their achievements and personal agenda [29]. As a result, patients will  
439 have the feeling to be approached as a person instead of through their condition [6].

440 **CASES**

441 The method of Walker and Avant prescribes that several cases should be described to illustrate the  
442 attributes defined in step 4 [25]. The first case of Joseph encompasses all the attributes identified in  
443 the literature and is therefore identified as a model case. It is a fictive example of delivering care  
444 according to the goal-oriented process of care with focus on the underpinning attributes. The second  
445 case of Ben is identified as an additional case ~~as sin~~ it lacks one or more of the attributes. E.g. in the  
446 case of Ben the stage of goal-evaluation is missing. This stage is needed to make adjustment and  
447 reflections according to the process of achieving the personal goals. Finally, the third case of Mary is  
448 an example of the opposite of goal-oriented care. This is described as a contrary case. In this case, the  
449 health care provider does not take the needs and preferences of Mary into account. The provider only

450 thinks about convincing Mary of a healthy lifestyle which for her is not the main reason to visit her  
451 health care provider. Her main focus is on being able to go on a city trip to Madrid.

Joseph, 68- year old suffers from diabetes, hypertension and ~~cardiovascular disease~~chronic obstructive pulmonary disease. Throughout his entire working life, he was a secondary school teacher. He has been retired for three years now. Despite the fact that he is limited by his health condition, he loves spending time with gardening and playing with his grandchildren.

A few years ago he was a passionate cyclist, but his racing bike has been stored for a long time now. His friends encourage him to cycle with them on a weekly base. His wife supports this initiative and argues that this will be beneficial for his social contact.

Every month Joseph visits his family doctor for a check-up. For each consultation, he prepares a list of things he wants to discuss. He has the chance to share his story in an open communication in which trust and mutual respect are key components.

In his monthly check-up with his family doctor he suggests his wishes to cycle again with his friends. His doctor doubts whether this will be possible and after discussion and negotiation, they plan that he would join his friends in their weekly cycling trip but only for the first two hours. The group will be asked to adapt their pace and Joseph will make sure that he does not need to return back home on his own. The doctor makes adjustments to the medication scheme according to the increased efforts Joseph will make. He will also contact the cardiologist to inform him about the changes to the medication schema. The family doctor and the cardiologist will collaborate in order to succeed in Joseph's goal.

The family doctor and Joseph agree to discuss and evaluate the course after three months. It is possible to increase or decrease the intensity depending on Joseph's health state and his own preferences.

*Box 1 Model case of Joseph*

Ben, a 30-year old man, was renovating a house that he bought with his girlfriend when he was diagnosed with MS. They made plans to marry next year and to make a world trip as honeymoon. These plans have been put aside due to the recent diagnosis. Although he was feeling down and did not have the energy to do anything he ended up with an excellent physician. Initiated by the interaction and the conversation with his physician he was enabled to set goals again and to look

*Box 2 Additional case of Ben*

452

Mary is a 40-year old mother of two young children and dealing with obesity since her childhood. Due to her weight, she has a lot of joints pain and is short of breath which limits her exercising capacity. Her children are already looking forward to playing outside with their mother during the summer holidays. Unfortunately, she is not able to play soccer or jump on the trampoline because of the pain. The pain becomes too much for her and after long hesitation she discusses this with her physician. The only thing she wants is to play and interact with her children as painless as possible and therefore asks her physician to prescribe some medication. Her physician does not support medication, but instructs her to first strive for a healthy weight as a solution to relieve the pain. This is not aligned with the wishes of Mary who only wanted a short-term solution to be able to play with her children. In the upcoming summer, she wants to make a city trip with the entire family to Madrid. Therefore she is seeing her physician to discuss the options to travel as painless and comfortable as possible. Her physician does not allow the travel plans and instructs her to first strive for a healthy weight and then plan trip when she has lost weight. This is not aligned with the wishes of Mary who only want's a short term solution to cope with her condition during the city trip. In the end, she leaves the consultation room with a referral to a dietitian and sport coach.

*Box 3 Contrary case of Mary*

453

454

## 455 Antecedents

456 Antecedents are events or incidents that occur prior to the investigated concept. In this concept  
457 analysis, provider preparedness and patient preparedness are required to provide goal-oriented care.

458 In terms of provider preparedness many authors discussed the importance of training [6, 7, 29, 33, 37,  
459 47, 55]. Notwithstanding that several authors [1, 4, 17, 28, 33, 38, 44] mentioned the importance of  
460 trained health care providers, there was a difference in the training they received (supplementary file  
461 [23](#)). Differences can be found in the target population reached with the training, both in  
462 monodisciplinary and interprofessional training (e.g. general practitioners [28], practice nurses [33],  
463 duration of the training (e.g. three hour [28], number of sessions [33]) and training method (e.g. role-  
464 play [38]). Thereby, the content of the training was tailored to the skills needed to carry out the  
465 intervention correctly and differ therefore in each training ([S3 Table 3](#)).

466 A second aspect that is discussed concerning provider preparedness focused on the personal skills of  
467 providers [1, 6, 17, 28]. These include communication and balancing skills in which an open  
468 communication with the patient is necessary and in which an equal balance between the patient and  
469 provider is a premise [1, 6, 17, 28]. Other defined skills were the provider's ability to listen, understand  
470 and bearing witness to the patient's story [28] and their willingness to change and learn new skills to  
471 provide care according to the goal-oriented process of care [1].

472 ~~Next Beside to~~ provider preparedness some authors [1, 12, 47] specifically talked about the need of  
473 patient preparedness. Patients needed to be prepared to share their needs and preferences when  
474 entering a care relationship [1]. Some authors translate the importance of patient preparedness into  
475 patient education [1], others talked about patient guidance (11) or supporting patients in developing  
476 the skills to set personal goals [42].

477

## 478 Consequences

479 Consequences are those events or incidents that occur as a result of a concept. For the concept of goal-  
480 oriented care, the consequences defined throughout the papers could be categorized in: (a) patient-  
481 related consequences [1, 3, 4, 29, 35, 54], (b) provider-related consequences [1, 28, 35, 54], (c) care-  
482 related consequences [1, 28, 35] and (d) general consequences [4, 6, 35].

483 Patient-related consequences are the results for patients themselves after they received care following  
484 a goal-oriented process. A goal-directed approach could be expected to increase patient satisfaction,  
485 since the values, preferences, knowledge and opinions that each patient brought to the provider-  
486 patient relationship was more valued [45]. Also, emphasis was put on the changed way of  
487 communicating in which patients felt more freely and able to speak [3]. This led to the overall feeling  
488 of being heard, understood, respected and engaged in their care [35]. Furthermore, a goal-oriented  
489 process of care could lead to a better understanding and more in-depth knowledge of patients  
490 regarding their health, activation of patients to be more involved in their care and an increase in their  
491 overall commitment. This resulted in the increase of adherence [3]. Also Mold argued that it could  
492 contribute to a better adherence [13]. In general, the gained in-depth knowledge of patients  
493 concerning their health and a better understanding of their tasks could help to improve their quality  
494 of life [3]. This was enhanced by the maximization of function and the independence<sup>y</sup> patients gained  
495 [13].

496 For providers, goal-oriented care assisted healthcare them in their decision-making [35] and gave them  
497 the opportunity to get to know their patients better. It enhanced patient-provider collaboration [13]  
498 and contributed therefore to more job satisfaction [28].

499 Care-related consequences were mainly focused on reducing costs, overtreatment and fragmentation  
500 [1, 28, 35], since care oriented to patients' priorities would reduce tests and treatments [50]. Bernsten

501 et al. stated also that goal-oriented care could lead to an improvement of quality of care and quality  
502 of life [6].

503 Although, many positive outcomes have been presented, Reuben et al. mentioned a possible downside  
504 of goal-oriented care [10]. They described that some decisions to strive for personal goals may worsen  
505 the providers' performance on aggregated health measures. For example, when a diabetic patient  
506 chooses to not follow his diet and keep on smoking, because it would be a too big lifestyle change, his  
507 HbA1c-level would not be aligned with the guidelines. Although, it could be a positive outcome from  
508 the patient perspective, it would influence the quality of care provided and the population health in a  
509 negative way.

510

511

512

513

514

515

516

517

518

519

520

521

522



523 **Empirical referents**

524 Empirical referents provide an overview of the identified assessments tools related to the attributes  
525 aiming to make the concept measurable.

526 None of the papers mentioned an empirical referent to measure the entire concept of goal-oriented  
527 care. Therefore, tools have been searched for each individual sub-attribute. Examples are listed in  
528 [Table 45](#) which gives an overview of possible tools and presents an example item presented in that  
529 tool. Listing the existing individual empirical referents might initiate the development of an overall  
530 empirical referent.

531

Formatted: English (United States)

| Attribute                                                                      | Purpose of the tool                                                                                                                                                                                               | Example of item in the assessment tool                                                                                                                                                                                                                                                 |
|--------------------------------------------------------------------------------|-------------------------------------------------------------------------------------------------------------------------------------------------------------------------------------------------------------------|----------------------------------------------------------------------------------------------------------------------------------------------------------------------------------------------------------------------------------------------------------------------------------------|
| Goal-elicitation                                                               |                                                                                                                                                                                                                   |                                                                                                                                                                                                                                                                                        |
| Davis Observation Code (DOC) [62]                                              | <a href="#">20-item direct observation scale for physician-patient interactions</a>                                                                                                                               | Discussing family, medical, or social history and/ or current family functioning.                                                                                                                                                                                                      |
| Goal-setting                                                                   |                                                                                                                                                                                                                   |                                                                                                                                                                                                                                                                                        |
| Patient goal priority questionnaire [63]                                       | <a href="#">Patient-specific measure for identification of behavioral goals and evaluation of clinically significant changes</a>                                                                                  | Which activities are most important for you to manage?                                                                                                                                                                                                                                 |
| Self-identified goals assessment [64]                                          | <a href="#">1) Helps patients to identify personally meaningful occupational goals to be addressed in therapy</a><br><a href="#">2) evaluate changes levels of patient-defined success in desired occupations</a> | Think about all of the things you want to be able to do. It might help to think about the things you did at home before you went to the hospital, and things that are hard to do now. What types of things would you like to work on or improve on in therapy before you go back home? |
| <a href="#">Canadian Occupational Performance Measure (COPM)</a> [65]          | <a href="#">Measure of a client's self-perception of occupational performance in the areas of self-care, productivity, and leisure</a>                                                                            | Semi-structured interview – discussing daily functioning and personal life.                                                                                                                                                                                                            |
| Health outcome prioritization tool [65]                                        | <a href="#">Tool for decision-making among older persons with multiple chronic conditions</a>                                                                                                                     | I would like to know how important 'keeping you alive', 'maintaining independence', 'reducing or eliminating pain' and 'reducing or eliminating symptoms of dizziness, fatigue, shortness of breath' is to you.                                                                        |
| <a href="#">Electronic Patient Reported Outcome Tool (EePRO-tool)</a> [67]     | <a href="#">Tool can help patients and providers to collaboratively develop healthcare goals</a>                                                                                                                  | Goal-setting for five different areas identified as most important.                                                                                                                                                                                                                    |
| Goal-evaluation                                                                |                                                                                                                                                                                                                   |                                                                                                                                                                                                                                                                                        |
| Goal-attainment scale [68]                                                     | <a href="#">Tool to measure in which extent patients' goals have been met</a>                                                                                                                                     | Determining goal-attainment using 5-point scale.                                                                                                                                                                                                                                       |
| <a href="#">Patient Assessment of Care for Chronic Conditions (PACIC)</a> [69] | <a href="#">Tool to measure quality of chronic disease care</a>                                                                                                                                                   | Asked to talk about my goals in caring for my condition.                                                                                                                                                                                                                               |

Formatted: Font:

Formatted: Position: Horizontal: 0", Relative to: Page, Vertical: 0.33", Relative to: Paragraph

Formatted: English (United States)

|                                                      |                                                                                         |                                                                                                |
|------------------------------------------------------|-----------------------------------------------------------------------------------------|------------------------------------------------------------------------------------------------|
| Goal-setting evaluation tool [70]                    | <a href="#">Tool to rate the quality of goals and action plans</a>                      | Does the plan identify specific actions or activities that could help to reach the goal?       |
| Person's context and patient's needs and preferences |                                                                                         |                                                                                                |
| Person-centered primary care measure (PCPCM) [71]    | <a href="#">11-item patient-reported measure to assess primary care aspects</a>         | My doctor or practice knows me as a person/ Over time, the practice helps me to meet my goals. |
| Patient centered observation form (PCOF) [72]        | <a href="#">Tool to help healthcare providers communicate effectively with patients</a> | Collaborative upfront agenda setting.                                                          |

Formatted: English (United States)

535 **CONCLUSION OF THE CONCEPT ANALYSIS**

536 Fig. 2 represents the overall synthesis of this concept analysis of goal-oriented care. Goal-oriented care  
537 could be described as a health care approach encompassing a multifaceted, dynamic and iterative  
538 process underpinned by the patient's context and values. The process is characterized by three stages:  
539 goal-elicitation, goal-setting and goal-evaluation in which patients' needs and preferences form the  
540 common thread. In order to be able to deliver care according to the principles of the goal-oriented  
541 care process, both providers and patients need to be prepared. In terms of the consequences of goal-  
542 oriented care literature points to the potential of goal-oriented care to improve patients' experiences  
543 and provider well-being, the potential to reduce costs and improve the overall health of the  
544 population. Furthermore, a model, a contrary and an additional case illustrated an example of goal-  
545 oriented care in practice. The empirical referents showed that it is currently not possible to measure  
546 goal-oriented care in its entirety and presented an overview of possible referents for each sub  
547 attribute. Although the literature allowed us to gain more insight into the concept of goal-oriented  
548 care, different aspects need to be further discussed.

549 **Fig. 2 Schematic representation of the antecedents, attributes and consequences.**

550

551

552

553

554

555

556

## 557 **Discussion and conclusion**

558 This concept analysis aimed to tackle the lack of a common understanding of goal-oriented care by  
559 identifying the attributes, antecedents and consequences using the method of Walker and Avant [25].  
560 The overall analysis showed that a goal-oriented care generally entails three stages. Despite these  
561 three stages the process of goal-oriented care cannot be implemented as a linear protocol or checklist.  
562 Two underpinning attributes, the patient's context and the patient's needs and preferences form the  
563 common thread throughout this goal-oriented process of care. These underpinning attributes  
564 represent the philosophy of care. Goal-oriented care is a continuous interaction where you go back  
565 and forth to gain a person-centered approach (Fig. 2).

566 In the stage of goal-elicitation, greater consideration should be given to the patients' peripheral  
567 narrative reflecting their lived experiences [37]. Several authors have investigated components of goal-  
568 elicitation. Murdoch and colleagues performed a conversation analysis of patients-providers  
569 interaction during their encounters and found that eliciting the patients' understanding is an important  
570 component [73]. Ospina et al. investigated the extent to which patients' concerns are elicited across  
571 different clinical settings [74]. They concluded that providers seldom elicit the patients' agenda. This  
572 reduces the chance that providers will orient their consultation towards the specific aspects that  
573 matter to the patient [74]. One of the prerequisites to succeed in goal-elicitation is the mutual  
574 understanding about the expectations of the consultations between patients and providers and a  
575 qualitative relationship between patients and providers [73]. The literature also mentions that patients  
576 need to have a set of skills to make appropriate health decisions and reflect on their health care choices  
577 [75]. They have to be capable to open up and tell their story [76]. It is important that patients  
578 understand the meaning of information communicated by the provider, must appreciate the  
579 consequences of the treatment options, and must reason about the information based on his or her  
580 own values and preferences [76].

581 ~~Next to~~Besides the stage of goal-elicitation, the stage of goal-setting wais defined. One of the  
582 remaining knowledge gaps is on what kind of goals patients set. In goal-oriented care it seems  
583 important to set goals based on the patients' needs and preferences (e.g. I want to take my  
584 grandchildren to school), while in other chronic disease management programs emphasis is mainly still  
585 on health-related goals (e.g. I want the patient to walk without pain) [4]. Various work in different  
586 settings identified that patients do not necessarily have clearly defined goals for themselves [73].  
587 Although, several authors performed research on the categorization of patients' goals. Vermunt et al.  
588 performed for example a qualitative study to develop conceptual descriptions of goal-oriented care  
589 [47]. They presented a three-level goal hierarchy containing disease- or symptom specific goals,  
590 functional goals, and fundamental goals which provides more insight in the type of goals. A second  
591 example is the distinction made by Schellinger et al. between medical, nonmedical, multiple, and  
592 global goals [46]. Not only is there ~~is~~ ambiguity on what goals patients set, it is also not clear how goals  
593 are being set. What is clear is that patients and providers must collaborate and negotiate on which  
594 goals are important. Nevertheless, this can still cause conflicts between the patients' goals and  
595 providers' goals [31, 66]. To overcome these conflicts, it is suggested to first set the patients' goals  
596 and then discuss about the medical goals, because conflicts are more likely when goals are placed on  
597 the same level [32]. It should however be noticed that setting the patients' goals on top does not  
598 legitimate full patients' responsibility over the care plan [32]. Another way to overcome these conflicts  
599 is to work with a facilitator as Naik et al. did in developing their patients priorities identification process.  
600 These facilitators supported patients in setting goals, choosing the most important goals to eventually  
601 communicate them with the provider [4]. Yet another strategy is to use tools to assess patient  
602 treatment priorities and preferences. Unfortunately, Mangin et al. found few relevant tools to set  
603 patients' goals ~~The systematic review of tools to assess patient treatment priorities and preferences~~  
604 ~~by Mangin et al. found few relevant tools to set patient's goals [35].~~ They argue for the need to develop  
605 specific strategies to make patient priorities visible in the clinical record and medical-decision making  
606 [35].

607 Goal-evaluation was pointed out as the last stage. As presented in the results, several authors  
608 described that goals should be made measurable for evaluation [28, 67]. There are some pitfalls  
609 related to goal-evaluation. Salter et al. described that not all goals lend themselves to being measured  
610 [28]. It is for example challenging to evaluate the goal 'I want to take my grandchildren from school as  
611 long as possible'. Another pitfall is that patients' goals would be simplified to what can be measured.  
612 Working towards goal-evaluation might increase the pressure on patients and providers to work in the  
613 same way as disease-specific guidelines do [77]. Especially from the perspective of patients with  
614 multimorbidity it can be questioned whether disease-specific guidelines that are good for the disease  
615 are also good for the patient [77]. Furthermore, evidence shows that older multimorbid patients place  
616 quantitative health outcomes, such as longer survival, on a lower level of importance [77]. The focus  
617 must be on the patients' values and make healthcare more humane [45].

618 As mentioned for the antecedents it is important that patients and providers are prepared to work  
619 towards a goal-oriented process of care. The collaboration and co-creation between the two partners  
620 and in an interprofessional team is an important but insufficient prerequisite to succeed in providing  
621 goal-oriented care. Currently patients are not always stimulated to think about their care. They have  
622 to be stimulated to actively engage their narrative and to share their priorities. Also providers have to  
623 develop complementary skills in which they learn to let go their own assumptions and solutions. They  
624 have to learn to integrate patients' narrative in their care plan and improve their communication skills  
625 to strengthen the mutual understanding between them [78]. Voigt et al. observed that GPs are often  
626 unaware of patients' priorities in daily life, which were in contrast with their perceived importance of  
627 patient's medical goals [78]. Training and tools could provide the guidance needed to improve the  
628 communication [1, 4, 17, 28, 33, 38, 44]. It could support providers in structuring the conversation, to  
629 set goals in collaboration with patients, and to align their care to those goals. Not only does goal-  
630 oriented care offers a specific approach for one-on-one interaction between patients and providers, it  
631 could also facilitate interprofessional collaboration. It gives providers from diverse disciplines the  
632 opportunity to deliver care following the same principles and to focus on pursuing patients' goals [40].

633 Therefore training should also include the interprofessional perspective to facilitate a uniform attitude  
634 towards the patients' goals and principles of goal-oriented care in the entire team. This will potentially  
635 support providers to learn from and with each others' expertise and enable discussion between them  
636 in case that, for example, patients set goals that our out of the remit of the provider. Besides patient  
637 and provider preparedness, it could seem logical that also the system has to be prepared, but the  
638 current literature does not point to that.

639 In terms of the consequences of goal-oriented care, a limited number of studies have been able to  
640 demonstrate outcomes of goal-oriented care. Nonetheless, these studies showed mostly positive  
641 outcomes. ~~Mostly positive outcomes have been presented~~ towards the patients, providers, health  
642 system, and overall population well-being. In that respect, goal-oriented care shows the potential to  
643 meet the components of the quadruple aim. It can be questioned if all providers experience increased  
644 satisfaction and well-being in providing goal-oriented care. Providers have to learn to cope with  
645 another way of delivering care. For example, a changed medication scheme as described in Josephs'  
646 case in order to work towards patients' goals. This goes against their basic principles to strive for the  
647 best possible health status including a comprehensive medication scheme. Besides that the provider  
648 well-being can be questioned, Blom et al. also contradicted the positive results for the health care  
649 system. They did not ~~find~~ find a beneficial effect in health care use and costs when using a proactive,  
650 goal-oriented, integrated care model [33].

651 One of the reasons of the limited number of effectiveness studies of goal-oriented care is the lack of  
652 empirical referents. The concept must still undergo the transition towards an evaluable concept. Boyd  
653 et al. argue for measures for quality of care needed by older persons with multimorbidity as the current  
654 clinical guidelines have undesirable effects for this population [57]. Goal-oriented care is ~~however~~  
655 identified by Etz and colleagues as one of the main constructs when developing a new comprehensive  
656 measure of high-value aspects of primary care, however they did not mention how it has to be done  
657 [79]. ~~Further~~ Also Young et al. described outcome goals as a main construct when differentiating  
658 processes and outcomes for primary care and divided it further in goal-clarity for multimorbidity, goal-



659 clarity for unique patient priorities and goal timing [80]. It is clear that in order to gain more insight in  
660 the consequences of goal-oriented care further research must primarily focus on how goal-oriented  
661 care is provided and can be supported. In order to investigate the potential benefits of goal-oriented  
662 care, research also needs to work on developing indicators of the goal-oriented process of care.

### 663 **Strengths, limitations, and recommendations**

664 The method of Walker and Avant provides a rigorous and systematic approach to refine the concept  
665 of goal-oriented care through the existing literature. A concept analysis is an exploration of an evolving  
666 concept which will need to be enriched by new knowledge. Therefore, it is influenced by contextual  
667 factors and must undergo adjustments to new implications and new insights based on further  
668 research. Since there is no specification given by Walker and Avant on how to conduct the literature  
669 review, we followed the guidelines from a scoping review as described by Levac (2010) [26]. The  
670 iterative process of adding new articles following the snowballing method is one of the strengths  
671 compared to other types of reviews. In this concept analysis, this led to a larger number of articles than  
672 the original search. A possible explanation for this might be that goal-oriented care was covered by  
673 synonyms or similar concepts that were not covered by the original search. Despite the systematic  
674 approach, a concept analysis does not comprise a quality assessment of the literature. However, it  
675 seemed to be an appropriate method to provide the knowledge needed to understand the different  
676 components of goal-oriented care in its entirety. The literature that was included in this study were  
677 only English written and peer reviewed. It would however be interesting to add also non-English  
678 literature to be able to capture more differences (e.g. cultural differences).

679 The literature search identified both original research papers and position papers. Some original  
680 research papers [3, 4, 28, 43, 46] evaluated goal-oriented care in clinical practice. These papers  
681 identified and described goal-oriented care as a stepwise intervention. Position papers [1, 12, 13, 40,  
682 42] mostly described components of goal-oriented care rather than such a stepwise approach. The  
683 combination of both types gave more insight in the broad components of goal-oriented care.

684 This concept analysis could also be considered as a preliminary step to facilitate further research. One  
685 of the knowledge gaps revealed in this concept analysis is the lack of knowledge on what patients'  
686 goals are set, how goal-oriented care is delivered, and how it is best put into practice in both one-on-  
687 one interactions between patients and providers and in interprofessional collaboration. Regarding  
688 patients it is important to gain more insight in how they are preferably prepared for discussing their  
689 personal goals. In addition, the list of empirical referents made clear that a golden standard to evaluate  
690 goal-oriented care is missing. Initiating the development of an evaluation method could enable future  
691 intervention studies to gain more insight in the consequences of goal-oriented care and to make results  
692 comparable. Increasing insights from effective goal-oriented care could highlight its multiple benefits  
693 towards providers and policy makers. These results might also inform the healthcare system in which  
694 resources they need to facilitate goal-oriented care. This might be required to convince providers and  
695 policy makers of the benefits of goal-oriented care. A following step will first be to discuss these  
696 theoretical insights with patients and providers and deepen this information with insights from  
697 practices. Then, when goal-oriented care is well understood, a critical review can be set up to perform  
698 in-depth comparison between other concepts and frameworks. At this moment, we have  
699 (unfortunately) insufficient information to do this.

700 Goal-oriented care shows the potential to be a way forward for patients with chronic conditions and  
701 multimorbidity. However, further research is needed to ~~further~~ translate the current knowledge on  
702 the concept of goal-oriented care into a tangible workflow process of care that entails the three stages.  
703 This workflow should consists of tools to prepare patients and providers to offer goal-oriented care.  
704 This could contribute to finding a common ground in the goals and implementing goal-oriented care  
705 in practice. This workflow should include the skills and tools patients and providers need to implement  
706 goal-oriented care in practice.

707

708

## 709 **Conclusion**

710 This concept analysis aimed to translate the concept of goal-oriented care into a common  
711 understanding so providers can better understand and use this concept in clinical practice. The various  
712 literature on goal-oriented care, based on position and original research papers, showed a stepwise  
713 approach of three stages. Overall, the underpinning attributes of patients' context and patients' values  
714 form a philosophy of care to which the process must be reflected. Furthermore, both patients and the  
715 providers need to develop new skills in order to rethink the way care is provided. Patients must  
716 therefore be enabled to open up and reflect on their own agenda. Providers instead must learn to let  
717 go their own assumptions and solutions and communicate with their patients in a more balanced  
718 context. Based on the literature goal-oriented care shows the potential to improve patients'  
719 experience by listening to their needs and preferences, improve providers' well-being by the feeling of  
720 more satisfaction and reduce health care costs. Goal-oriented care could answer the challenges  
721 patients face with multiple care processes by initiating interprofessional collaboration. However,  
722 further research must focus on what and how goals are set, the translation of these findings into a  
723 workflow and must initiate the development of an evaluation method in order to investigate the  
724 effects of goal-oriented care processes on patients, providers and the health care system.

## 725 **Acknowledgments**

726 We are grateful for the partnership with the Primary Care Academy (academie-eerstelijjn.be) and want  
727 to thank the King Baudouin Foundation and Fund Daniel De Coninck for the opportunity they offer us  
728 for conducting research and have impact on the primary care of Flanders, Belgium. [The consortium of](#)  
729 [the Primary Care Academy consists of: Lead author: Roy Remmen – roy.remmen@uantwerpen.be -](#)  
730 [Department of Primary Care and Interdisciplinary Care, Faculty of Medicine and Health Sciences,](#)  
731 [University of Antwerp, Antwerp, Belgium; Emily Verté - Department of Primary Care and](#)  
732 [Interdisciplinary Care, Faculty of Medicine and Health Sciences, University of Antwerp, Antwerp.](#)

733 [Belgium, Department of Family Medicine and Chronic Care, Faculty of Medicine and Pharmacy. Vrije](#)  
734 [Universiteit Brussel. Brussel. Belgium; Muhammed Mustafa Sirimsi - Centre for research and](#)  
735 [innovation in care, Faculty of Medicine and Health Sciences. University of Antwerp. Antwerp. Belgium;](#)  
736 [Peter Van Bogaert - Workforce Management and Outcomes Research in Care, Faculty of Medicine and](#)  
737 [Health Sciences. University of Antwerp. Belgium; Hans De Loof - Laboratory of Physio pharmacology,](#)  
738 [Faculty of Pharmaceutical Biomedical and Veterinary Sciences. University of Antwerp. Belgium; Kris](#)  
739 [Van den Broeck - Department of Primary Care and Interdisciplinary Care, Faculty of Medicine and](#)  
740 [Health Sciences. University of Antwerp. Antwerp. Belgium.; Sibyl Anthierens -](#)  
741 [Department of Primary Care and Interdisciplinary Care, Faculty of Medicine and Health Sciences.](#)  
742 [University of Antwerp. Antwerp. Belgium; Ine Huybrechts - Department of Primary Care and](#)  
743 [Interdisciplinary Care, Faculty of Medicine and Health Sciences. University of Antwerp. Antwerp.](#)  
744 [Belgium.; Peter Raeymaeckers - Department of Sociology, Faculty of Social Sciences, Faculty of Social](#)  
745 [Sciences. University of Antwerp. Belgium; Veerle Buffel- Department of Sociology; centre for](#)  
746 [population, family and health, Faculty of Social Sciences. University of Antwerp. Belgium. ; Dirk](#)  
747 [Devroey- Department of Family Medicine and Chronic Care, Faculty of Medicine and Pharmacy. Vrije](#)  
748 [Universiteit Brussel. Brussel.; Bert Aertgeerts - Academic Centre for General Practice, Faculty of](#)  
749 [Medicine. KU Leuven. Leuven, Department of Public Health and Primary Care, Faculty of Medicine, KU](#)  
750 [Leuven. Leuven; Birgitte Schoenmakers - Department of Public Health and Primary Care, Faculty of](#)  
751 [Medicine, KU Leuven. Leuven. Belgium; Lotte Timmermans - Department of Public Health and Primary](#)  
752 [Care, Faculty of Medicine, KU Leuven. Leuven. Belgium.; Veerle Foulon - Department of Pharmaceutical](#)  
753 [and Pharmacological Sciences, Faculty Pharmaceutical Sciences. KU Leuven. Leuven. Belgium.; Anja](#)  
754 [Declerq - LUCAS-Centre for Care Research and Consultancy, Faculty of Social Sciences. KU Leuven.](#)  
755 [Leuven. Belgium.; Nick Verhaeghe - Research Group Social and Economic Policy and Social Inclusion,](#)  
756 [Research Institute for Work and Society. KU Leuven. Belgium.; Dominique Van de Velde](#)  
757 [Department of Rehabilitation Sciences, Occupational Therapy. Faculty of Medicine and Health](#)  
758 [Sciences. University of Ghent. Belgium., Department of Occupational Therapy. Artevelde University of](#)

759 [Applied Sciences. Ghent. Belgium.; Pauline Boeckxstaens - Department of Public Health and Primary](#)  
760 [Care, Faculty of Medicine and Health sciences. University of Ghent. Belgium.; An De Sutter -](#)  
761 [Department of Public Health and Primary Care, Faculty of Medicine and Health sciences. University of](#)  
762 [Ghent. Belgium.; Patricia De Vriendt - Department of Rehabilitation Sciences, Occupational Therapy.](#)  
763 [Faculty of Medicine and Health Sciences. University of Ghent. Belgium., Frailty in Ageing \(FRIA\)](#)  
764 [Research Group, Department of Gerontology and Mental Health and Wellbeing \(MENT\) research](#)  
765 [group, Faculty of Medicine and Pharmacy. Vrije Universiteit. Brussels. Belgium., Department of](#)  
766 [Occupational Therapy. Artevelde University of Applied Sciences. Ghent. Belgium.; Lies Lahousse](#)  
767 [- Department of Bioanalysis, Faculty of Pharmaceutical Sciences, Ghent University. Ghent. Belgium.;](#)  
768 [Peter Pype - Department of Public Health and Primary Care, Faculty of Medicine and Health sciences.](#)  
769 [University of Ghent. Belgium., End-of-Life Care Research Group, Faculty of Medicine and Health](#)  
770 [Sciences. Vrije Universiteit Brussel and Ghent University. Ghent. Belgium.; Dagje Boeykens-](#)  
771 [Department of Rehabilitation Sciences, Occupational Therapy. Faculty of Medicine and Health](#)  
772 [Sciences. University of Ghent. Belgium., Department of Public Health and Primary Care, Faculty of](#)  
773 [Medicine and Health sciences. University of Ghent. Belgium.; Ann Van Hecke - Department of Public](#)  
774 [Health and Primary Care, Faculty of Medicine and Health sciences. University of Ghent. Belgium.,](#)  
775 [University Centre of Nursing and Midwifery, Faculty of Medicine and Health Sciences. University of](#)  
776 [Ghent. Belgium.; Peter Decat - Department of Public Health and Primary Care, Faculty of Medicine and](#)  
777 [Health sciences. University of Ghent. Belgium.; Rudi Roose - Department of Social Work and Social](#)  
778 [Pedagogy, Faculty of Psychology and Educational Sciences. University Ghent. Belgium.; Sandra Martin](#)  
779 [- Expertise Centre Health Innovation. University College Leuven-Limburg. Leuven. Belgium.; Erica](#)  
780 [Rutten - Expertise Centre Health Innovation. University College Leuven-Limburg. Leuven. Belgium.;](#)  
781 [Sam Pless - Expertise Centre Health Innovation. University College Leuven-Limburg. Leuven. Belgium.;](#)  
782 [Vanessa Gauwe - Department of Occupational Therapy. Artevelde University of Applied Sciences.](#)  
783 [Ghent. Belgium.; Didier Reynaert- E-QUAL, University College of Applied Sciences Ghent. Ghent.](#)  
784 [Belgium.; Leen Van Landschoot - Department of Nursing, University of Applied Sciences Ghent. Ghent.](#)

785 [Belgium.; Maja Lopez Hartmann - Department of Welfare and Health, Karel de Grote University of](#)  
786 [Applied Sciences and Arts. Antwerp. Belgium.; Tony Claeys- LiveLab, VIVES University of Applied](#)  
787 [Sciences. Kortrijk. Belgium.; Hilde Vandenhoudt - LiCalab, Thomas University of Applied Sciences.](#)  
788 [Turnhout. Belgium.; Kristel De Vlieghe - Department of Nursing – homecare, White-Yellow Cross.](#)  
789 [Brussels. Belgium.; Susanne Op de Beeck - Flemish Patient Platform. Heverlee. Belgium.](#)

790

791

792

793

794

795

796

797

798

799

800

801

802

803

804

805 **References**

806 1. Tinetti ME, Esterson J, Ferris R, Posner P, Blaum CS. Patient Priority-Directed Decision Making  
807 and Care for Older Adults with Multiple Chronic Conditions. *Clinics in geriatric medicine*.  
808 2016;32(2):261-75. PubMed PMID: 27113145.

809 2. Rijken M, Bekkema N, Boeckstaens P, Schellevis FG, De Maeseneer JM, Groenewegen PP.  
810 Chronic Disease Management Programmes: an adequate response to patients' needs? *Health Expect*.  
811 2014;17(5):608-21. Epub 2012/06/21. doi: 10.1111/j.1369-7625.2012.00786.x. PubMed PMID:  
812 22712877; PubMed Central PMCID: PMC5060914.

813 3. Feder SL, Kiwak E, Costello D, Dindo L, Hern, ez-Bigos K, et al. Perspectives of Patients in  
814 Identifying Their Values-Based Health Priorities. *Journal of the American Geriatrics Society*. 2019  
815 67(7):1379-85. PubMed PMID: 30844080.

816 4. Naik AD, Dindo LN, Van Liew JR, Hundt NE, Vo L, Hern, et al. Development of a Clinically  
817 Feasible Process for Identifying Individual Health Priorities. *Journal of the American Geriatrics*  
818 *Society*. 2018;66(10):1872-9. PubMed PMID: 30047069467.

819 5. Cassell A, Edwards D, Harshfield A, Rhodes K, Brimicombe J, Payne R, et al. The epidemiology  
820 of multimorbidity in primary care: a retrospective cohort study. *Br J Gen Pract*. 2018;68(669):e245-  
821 e51. Epub 2018/03/14. doi: 10.3399/bjgp18X695465. PubMed PMID: 29530918; PubMed Central  
822 PMCID: PMC5863678.

823 6. Berntsen G, Hoyem A, Lettrem I, Ruland C, Rumpsfeld M, Gammon D. A person-centered  
824 integrated care quality framework, based on a qualitative study of patients' evaluation of care in light  
825 of chronic care ideals. *BMC Health Serv Res*. 2018;18(1):479. Epub 2018/06/22. doi: 10.1186/s12913-  
826 018-3246-z. PubMed PMID: 29925357; PubMed Central PMCID: PMC6011266.

827 7. Ploeg J, Matthew-Maich N, Fraser K, Dufour S, McAiney C, Kaasalainen S, et al. Managing  
828 multiple chronic conditions in the community: a Canadian qualitative study of the experiences of  
829 older adults, family caregivers and healthcare providers. *BMC Geriatr*. 2017;17(1):40.

830 8. Kramer MH, Bauer W, Dicker D, Durusu-Tanriover M, Ferreira F, Rigby SP, et al. The changing  
831 face of internal medicine: patient centred care. *European journal of internal medicine*. 25(2):125-7.  
832 PubMed PMID: 24472695.

833 9. Kuluski K, Peckham A, Gill A, Gagnon D, Wong-Cornall C, McKillop A, et al. What is Important  
834 to Older People with Multimorbidity and Their Caregivers? Identifying Attributes of Person Centered  
835 Care from the User Perspective. *Int J Integr Care*. 2019;19(3):4. Epub 2019/08/02. doi:  
836 10.5334/ijic.4655. PubMed PMID: 31367203; PubMed Central PMCID: PMC6659759.

837 10. Reuben DB, Tinetti ME. Goal-oriented patient care--an alternative health outcomes  
838 paradigm. *The New England journal of medicine*. 2012;366(9):777-9. Epub 2012/03/02. doi:  
839 10.1056/NEJMp1113631. PubMed PMID: 22375966.

840 11. Kuipers SJ, Cramm JM, Nieboer AP. The importance of patient-centered care and co-creation  
841 of care for satisfaction with care and physical and social well-being of patients with multi-morbidity  
842 in the primary care setting. *BMC Health Serv Res*. 2019;19(1):1-9.

843 12. Reuben DB, Jennings LA. Putting Goal-Oriented Patient Care Into Practice. *Journal of the*  
844 *American Geriatrics Society*. 2019;67(7):1342-4. PubMed PMID: 30882888.

845 13. Mold JW, Blake GH, Becker LA. Goal-oriented medical care. *Family medicine*. 1991;23(1):46-  
846 51. Epub 1991/01/01. PubMed PMID: 2001782.

847 14. Sackett DL, Rosenberg WM, Gray JM, Haynes RB, Richardson WS. Evidence based medicine:  
848 what it is and what it isn't. *British Medical Journal Publishing Group*; 1996.

849 15. Baker A. Crossing the quality chasm: a new health system for the 21st century: *British*  
850 *Medical Journal Publishing Group*; 2001.

Formatted: Dutch (Belgium)

Formatted: Dutch (Belgium)

- 851 16. Elwyn G, Frosch D, Thomson R, Joseph-Williams N, Lloyd A, Kinnersley P, et al. Shared  
852 decision making: a model for clinical practice. *Journal of general internal medicine*.  
853 2012;27(10):1361-7.
- 854 17. Vermunt N, Harmsen M, Westert GP, Olde Rikkert MGM, Faber MJ. Collaborative goal setting  
855 with elderly patients with chronic disease or multimorbidity: a systematic review. *BMC Geriatr*.  
856 2017;17(1):167. Epub 2017/08/02. doi: 10.1186/s12877-017-0534-0. PubMed PMID: 28760149;  
857 PubMed Central PMCID: PMC5537926.
- 858 18. Poitras ME, Maltais ME, Bestard-Denomme L, Stewart M, Fortin M. What are the effective  
859 elements in patient-centered and multimorbidity care? A scoping review. *BMC Health Serv Res*.  
860 2018;18(1):446. Epub 2018/06/15. doi: 10.1186/s12913-018-3213-8. PubMed PMID: 29898713;  
861 PubMed Central PMCID: PMC6001147.
- 862 19. Hobbs FR, Bankhead C, Mukhtar T, Stevens S, Perera-Salazar R, Holt T, et al. Clinical workload  
863 in UK primary care: a retrospective analysis of 100 million consultations in England, 2007–14. *The*  
864 *Lancet*. 2016;387(10035):2323-30.
- 865 20. IOM DoH CSCotFoP C, Donaldson M, Yordy K, Vanselow N. *Defining primary care: an interim*  
866 *report*. National Academy Press; 1994.
- 867 21. Institute of Medicine Committee on the Future of Primary Care. In: Donaldson M, Yordy K,  
868 Vanselow N, editors. *Defining Primary Care: An Interim Report*. Washington (DC): National  
869 Academies Press (US)
- 870 Copyright 1994 by the National Academy of Sciences.; 1994.
- 871 22. Ellner AL, Phillips RS. The Coming Primary Care Revolution. *J Gen Intern Med*.  
872 2017;32(4):380-6. Epub 2017/03/01. doi: 10.1007/s11606-016-3944-3. PubMed PMID: 28243869;  
873 PubMed Central PMCID: PMC5377886.
- 874 23. Elwyn G, Durand MA, Song J, Aarts J, Barr PJ, Berger Z, et al. A three-talk model for shared  
875 decision making: multistage consultation process. *bmj*. 2017;359:j4891.
- 876 24. Lusk JM, Fater K. A concept analysis of patient-centered care. *Nurs Forum*. 2013;48(2):89-98.  
877 Epub 2013/04/23. doi: 10.1111/nuf.12019. PubMed PMID: 23600637.
- 878 25. Walker LOA, K.C. *Strategies for theory constructing in nursing*. Texas 2019.
- 879 26. Levac D, Colquhoun H, O'Brien KK. Scoping studies: advancing the methodology. *Implement*  
880 *Sci*. 2010;5:69. Epub 2010/09/22. doi: 10.1186/1748-5908-5-69. PubMed PMID: 20854677; PubMed  
881 Central PMCID: PMC2954944.
- 882 27. Mourad Ouzzani HH, Zbys Fedorowicz, and Ahmed Elmagarmid. Rayyan - a web and mobile  
883 app for systematic reviews. *Systematic Reviews*. 2016;5(210). doi: 10.1186/s13643-016-0384-4.
- 884 28. Salter C, Shiner A, Lenaghan E, Murdoch J, Ford JA, Winterburn S, et al. Setting goals with  
885 patients living with multimorbidity: qualitative analysis of general practice consultations. *Br J Gen*  
886 *Pract*. 2019;69(684):e479-e88. Epub 2019/06/05. doi: 10.3399/bjgp19X704129. PubMed PMID:  
887 31160370; PubMed Central PMCID: PMC6592350.
- 888 29. Kessler D, Walker I, Sauve-Schenk K, Egan M. Goal setting dynamics that facilitate or impede  
889 a client-centered approach. *Scandinavian journal of occupational therapy*. 2018;26(5):315-24.  
890 PubMed PMID: 29671662.
- 891 30. De Maeseneer J, Boeckxstaens P. Care for noncommunicable diseases (NCDs): time for a  
892 paradigm-shift. *World hospitals and health services : the official journal of the International Hospital*  
893 *Federation*. 2011;47(4):30-3. PubMed PMID: 22619872.
- 894 31. Bayliss EA, Bonds DE, Boyd CM, Davis MM, Finke B, Fox MH, et al. Understanding the context  
895 of health for persons with multiple chronic conditions: moving from what is the matter to what  
896 matters. *Ann Fam Med*. 2014;12(3):260-9. Epub 2014/05/14. doi: 10.1370/afm.1643. PubMed PMID:  
897 24821898; PubMed Central PMCID: PMC4018375.
- 898 32. Berntsen GK, Gammon D, Steinsbekk A, Salamonsen A, Foss N, Ruland C, et al. How do we  
899 deal with multiple goals for care within an individual patient trajectory? A document content analysis  
900 of health service research papers on goals for care. *BMJ open*. 2015;5(12):e009403. Epub

Formatted: Dutch (Belgium)

Formatted: Dutch (Belgium)



2015/12/15. doi: 10.1136/bmjopen-2015-009403. PubMed PMID: 26656243; PubMed Central  
PMCID: PMC4679896.

33. Blom J, Elzen WD, Houwelingen Anne HV, Heijmans M, Stijnen T, Van Den Hout W, et al.  
Effectiveness and cost-effectiveness of a proactive, goal-oriented, integrated care model in general  
practice for older people. A cluster randomised controlled trial: Integrated systematic care for older  
people-the ISCOPE study. *Age and Ageing*. 2016;45(1):30-41. doi: 10.1093/ageing/afv174.

34. Boeckxstaens, Willems, Lanssens, Decuypere, Brusselle, Kühlein, et al. A qualitative  
interpretation of challenges associated with helping patients with multiple chronic diseases identify  
their goals. *Journal of comorbidity*. 2016;6(2):120-6.

35. Mangin D, Stephen G, Bismah V, Risdon C. Making patient values visible in healthcare: a  
systematic review of tools to assess patient treatment priorities and preferences in the context of  
multimorbidity. *BMJ open*. 2016;6(6):e010903.

36. Schmidt K, Babac A, Pauer F, Damm K, von der Schulenburg JM. Measuring patients' priorities  
using the Analytic Hierarchy Process in comparison with Best-Worst-Scaling and rating cards:  
methodological aspects and ranking tasks. *Health economics review*. 2016;6(1):50. PubMed PMID:  
27844450.

37. Franklin M, Lewis S, Willis K, Rogers A, Venville A, Smith L. Controlled, Constrained, or  
Flexible? How Self-Management Goals Are Shaped By Patient-Provider Interactions. *Qualitative  
health research*. 2019:1049732318774324. PubMed PMID: 29871583.

38. Tinetti M, Dindo L, Smith CD, Blaum C, Costello D, Ouellet G, et al. Challenges and strategies  
in patients' health priorities-aligned decision-making for older adults with multiple chronic  
conditions. *PLoS one*. 2019;14(6):e0218249. PubMed PMID: 31181117.

39. Hurn J, Kneebone I, Cropley M. Goal setting as an outcome measure: A systematic review.  
*Clinical rehabilitation*. 2006;20(9):756-72. Epub 2006/09/29. doi: 10.1177/0269215506070793.  
PubMed PMID: 17005500.

40. Bodenheimer T, Handley MA. Goal-setting for behavior change in primary care: an  
exploration and status report. *Patient education and counseling*. 2009;76(2):174-80. Epub  
2009/06/30. doi: 10.1016/j.pec.2009.06.001. PubMed PMID: 19560895.

41. Junius-Walker U, Stolberg D, Steinke P, Theile G, Hummers-Pradier E, Dierks M-L. Health and  
treatment priorities of older patients and their general practitioners: a cross-sectional study. *Quality  
in primary care*. 2011;19(2).

42. Lenzen SA, Daniels R, van Bokhoven MA, van der Weijden T, Beurskens A. Setting goals in  
chronic care: Shared decision making as self-management support by the family physician. *The  
European journal of general practice*. 2015;21(2):138-44. Epub 2014/12/30. doi:  
10.3109/13814788.2014.973844. PubMed PMID: 25541857.

43. Steele Gray C, Wodchis WP, Upshur R, Cott C, McKinstry B, Mercer S, et al. Supporting Goal-  
Oriented Primary Health Care for Seniors with Complex Care Needs Using Mobile Technology:  
Evaluation and Implementation of the Health System Performance Research Network, Bridgepoint  
Electronic Patient Reported Outcome Tool. *JMIR research protocols*. 2016;5(2):e126. PubMed PMID:  
27341765.

44. Kangovi S, Mitra N, Smith RA, Kulkarni R, Turr L, Huo H, et al. Decision-making and goal-  
setting in chronic disease management: Baseline findings of a randomized controlled trial. *Patient  
Educ Couns*. 2017;100(3):449-55. Epub 2016/10/09. doi: 10.1016/j.pec.2016.09.019. PubMed PMID:  
27717532; PubMed Central PMCID: PMC4537864.

45. Mold. Goal-directed health care: redefining health and health care in the era of value-based  
care. *Cureus* 2017;9(2).

46. Schellinger SE, Anderson EW, Frazer MS, Cain CL. Patient Self-Defined Goals: Essentials of  
Person-Centered Care for Serious Illness. *The American journal of hospice & palliative care*.  
2018;35(1):159-65. Epub 2017/03/24. doi: 10.1177/1049909117699600. PubMed PMID: 28330379;  
PubMed Central PMCID: PMC5704564.

47. Vermunt NP, Harmsen M, Elwyn G, Westert GP, Burgers JS, Olde Rikkert MG, et al. A three-  
goal model for patients with multimorbidity: A qualitative approach. *Health expectations* : an

Formatted: Dutch (Belgium)

Formatted: Dutch (Belgium)

Formatted: Dutch (Belgium)

Formatted: Dutch (Belgium)

953 international journal of public participation in health care and health policy. 2018;21(2):528-38.  
954 PubMed PMID: 29193557.

955 48. de Groot E, Schonrock-Adema J, Zwart D, Damoiseaux R, Van den Bogerd K, Diemers A, et al.  
956 Learning from patients about patient-centredness: A realist review: BEME Guide No. 60. Medical  
957 teacher. 2019;1-13. Epub 2019/12/20. doi: 10.1080/0142159x.2019.1695767. PubMed PMID:  
958 31852313.

959 49. Kuluski K, Guilcher SJT. Toward a Person-Centred Learning Health System: Understanding  
960 Value from the Perspectives of Patients and Caregivers. *HealthcarePapers*. 2019;18(4):36-46. Epub  
961 2020/01/05. doi: 10.12927/hcpap.2019.26030. PubMed PMID: 31901067.

962 50. Tinetti ME, Naik AD, Dindo L, Costello DM, Esterson J, Geda M, et al. Association of Patient  
963 Priorities-Aligned Decision-Making with Patient Outcomes and Ambulatory Health Care Burden  
964 among Older Adults with Multiple Chronic Conditions: A Nonrandomized Clinical Trial. *JAMA Internal  
965 Medicine*. 2019. PubMed PMID: 31901067.

966 51. Eckhoff DO, Weiss J. Goal setting: A concept analysis. *Nursing forum*. 2020. Epub 2020/01/07.  
967 doi: 10.1111/nuf.12426. PubMed PMID: 31902133.

968 ~~52. Purkale BA, Nagykaldi ZJ, Allahyar A, Todd R, Mold JW. Physicians' Response to  
969 Patients' Quality-of-Life Goals. *The Journal of the American Board of Family Medicine*.  
970 2020;33(1):71. doi: 10.3122/jabfm.2020.01.190169.~~

971 53. Sathanapally H, Sidhu M, Fahami R, Gillies C, Kadam U, Davies MJ, et al. Priorities of patients  
972 with multimorbidity and of clinicians regarding treatment and health outcomes: a systematic mixed  
973 studies review. *BMJ open*. 2020;10(2):e033445. Epub 2020/02/14. doi: 10.1136/bmjopen-2019-  
974 033445. PubMed PMID: 32051314.

975 54. Reuben DB, Tinetti ME. Goal-oriented patient care - An alternative health outcomes  
976 paradigm. *New England Journal of Medicine*. 2012;366(9):777-9. doi: 10.1056/NEJMp1113631.

977 55. Heisler M, Bouknight RR, Hayward RA, Smith DM, Kerr EA. The relative importance of  
978 physician communication, participatory decision making, and patient understanding in diabetes self-  
979 management. *Journal of general internal medicine*. 2002;17(4):243-52.

980 56. Purkale BA, Nagykaldi ZJ, Allahyar A, Todd R, Mold JW. Physicians' Response to Patients'  
981 Quality-of-Life Goals. *J Am Board Fam Med*. 2020;33(1):71-9. Epub 2020/01/08. doi:  
982 10.3122/jabfm.2020.01.190169. PubMed PMID: 31907248.

983 57. Boyd CM, Darer J, Boulton C, Fried LP, Boulton L, Wu AW. Clinical practice guidelines and quality of  
984 care for older patients with multiple comorbid diseases: implications for pay for performance. *Jama*.  
985 2005;294(6):716-24. Epub 2005/08/11. doi: 10.1001/jama.294.6.716. PubMed PMID: 16091574.

986 58. Mangin D, Stephen G, Bismah V, Risdon C. Making patient values visible in healthcare: A  
987 systematic review of tools to assess patient treatment priorities and preferences in the context of  
988 multimorbidity. *BMJ Open*. 2016;6(6). doi: 10.1136/bmjopen-2015-010903.

989 59. Vermunt NP, Harmsen M, Westert GP, Rikkert MGO, Faber MJ. Collaborative goal setting  
990 with elderly patients with chronic disease or multimorbidity: a systematic review. *BMC geriatrics*.  
991 2017;17(1):167.

992 60. Boyd CM, Wolff JL, Giovannetti E, Reider L, Weiss C, Xue Q-I, et al. Health care task difficulty  
993 among older adults with multimorbidity. *Medical care*. 2014;52(0 3):S118.

994 61. Locke EA, Latham GP. *A theory of goal setting & task performance*: Prentice-Hall, Inc; 1990.

995 62. Callahan EJ, Bertakis KD. Development and validation of the Davis Observation Code. *Fam  
996 Med*. 1991;23(1):19-24. Epub 1991/01/01. PubMed PMID: 2001776.

997 63. Åsenlöf P, Siljebäck K. The patient goal priority questionnaire is moderately reproducible in  
998 people with persistent musculoskeletal pain. *Physical therapy*. 2009;89(11):1226-34.

999 64. Melville LL, Baltic TA, Bettcher TW, Nelson DL. Patients' perspectives on the self-identified  
1000 goals assessment. *Am J Occup Ther*. 2002;56(6):650-9. Epub 2002/12/03. doi: 10.5014/ajot.56.6.650.  
1001 PubMed PMID: 12458857.

1002 65. Dedding C, Cardol M, Eyssen IC, Dekker J, Beelen A. Validity of the Canadian Occupational  
1003 Performance Measure: a client-centred outcome measurement. *Clinical rehabilitation*.  
1004 2004;18(6):660-7. Epub 2004/10/12. doi: 10.1191/0269215504cr7460a. PubMed PMID: 15473118.

Formatted: Dutch (Belgium)

Formatted: Dutch (Belgium)

Formatted: Dutch (Belgium)

1005 66. Fried TR, Tinetti M, Agostini J, Iannone L, Towle V. Health outcome prioritization to elicit  
1006 preferences of older persons with multiple health conditions. *Patient education and counseling*.  
1007 2011;83(2):278-82.

1008 67. Steele Gray C, Gill A, Khan AI, Hans PK, Kuluski K, Cott C. The Electronic Patient Reported  
1009 Outcome Tool: Testing Usability and Feasibility of a Mobile App and Portal to Support Care for  
1010 Patients With Complex Chronic Disease and Disability in Primary Care Settings. *JMIR Mhealth*  
1011 *Uhealth*. 2016;4(2):e58. Epub 2016/06/04. doi: 10.2196/mhealth.5331. PubMed PMID: 27256035;  
1012 PubMed Central PMCID: PMCPMC4911509.

1013 68. Toto PE, Skidmore ER, Terhorst L, Rosen J, Weiner DK. Goal Attainment Scaling (GAS) in  
1014 geriatric primary care: a feasibility study. *Arch Gerontol Geriatr*. 2015;60(1):16-21. Epub 2014/12/04.  
1015 doi: 10.1016/j.archger.2014.10.022. PubMed PMID: 25465505.

1016 69. Glasgow RE, Wagner EH, Schaefer J, Mahoney LD, Reid RJ, Greene SM. Development and  
1017 validation of the Patient Assessment of Chronic Illness Care (PACIC). *Med Care*. 2005;43(5):436-44.  
1018 Epub 2005/04/20. doi: 10.1097/01.mlr.0000160375.47920.8c. PubMed PMID: 15838407.

1019 70. Teal CR, Haidet P, Balasubramanyam AS, Rodriguez E, Naik AD. Measuring the quality of  
1020 patients' goals and action plans: development and validation of a novel tool. *BMC medical*  
1021 *informatics and decision making*. 2012;12:152. Epub 2012/12/29. doi: 10.1186/1472-6947-12-152.  
1022 PubMed PMID: 23270422; PubMed Central PMCID: PMCPMC3544573.

1023 71. Etz RS, Zyzanski SJ, Gonzalez MM, Reves SR, O'Neal JP, Stange KC. A New Comprehensive  
1024 Measure of High-Value Aspects of Primary Care. *Annals of family medicine*. 2019;17(3):221-30.  
1025 PubMed PMID: rayyan-47069321.

1026 72. Adam P, Murphy CF, Dierich M, Hager KD. Seven Years of Teaching Communication With the  
1027 Patient-Centered Observation Form. *Fam Med*. 2018;50(2):132-7. Epub 2018/02/13. doi:  
1028 10.22454/FamMed.2018.516713. PubMed PMID: 29432629.

1029 73. Murdoch J, Salter C, Ford J, Lenaghan E, Shiner A, Steel N. The "unknown territory" of goal-  
1030 setting: Negotiating a novel interactional activity within primary care doctor-patient consultations for  
1031 patients with multiple chronic conditions. *Soc Sci Med*. 2020;256:113040. Epub 2020/05/31. doi:  
1032 10.1016/j.socscimed.2020.113040. PubMed PMID: 32473530; PubMed Central PMCID:  
1033 PMCPMC7306159.

1034 74. Singh Ospina N, Phillips KA, Rodriguez-Gutierrez R, Castaneda-Guarderas A, Gionfriddo MR,  
1035 Branda ME, et al. Eliciting the Patient's Agenda- Secondary Analysis of Recorded Clinical Encounters. *J*  
1036 *Gen Intern Med*. 2019;34(1):36-40. Epub 2018/07/04. doi: 10.1007/s11606-018-4540-5. PubMed  
1037 PMID: 29968051; PubMed Central PMCID: PMCPMC6318197.

1038 75. Hersh L, Salzman B, Snyderman D. Health Literacy in Primary Care Practice. *Am Fam*  
1039 *Physician*. 2015;92(2):118-24. Epub 2015/07/16. PubMed PMID: 26176370.

1040 76. Sine DM, Sharpe VA. Ethics, risk, and patient-centered care: how collaboration between  
1041 clinical ethicists and risk management leads to respectful patient care. *J Healthc Risk Manag*.  
1042 2011;31(1):32-7. Epub 2011/07/28. doi: 10.1002/jhrm.20077. PubMed PMID: 21793115.

1043 77. Tinetti ME, Bogardus Jr ST, Agostini JV. Potential pitfalls of disease-specific guidelines for  
1044 patients with multiple conditions. *N Engl J Med*. 2004;351(27):2870-4.

1045 78. Voigt I, Wrede J, Diederichs-Egidi H, Dierks ML, Junius-Walker U. Priority setting in general  
1046 practice: health priorities of older patients differ from treatment priorities of their physicians.  
1047 *Croatian medical journal*. 2010;51(6):483-92. Epub 2010/12/17. doi: 10.3325/cmj.2010.51.483.  
1048 PubMed PMID: 21162160; PubMed Central PMCID: PMCPMC3012393.

1049 79. Etz R, Stange KC. Measuring what matters in primary care. *Global Advances in Health and*  
1050 *Medicine*. 2018;7:263. doi: 10.1177/2164956118773837.

1051 80. Young RA, Roberts RG, Holden RJ. The Challenges of Measuring, Improving, and Reporting  
1052 Quality in Primary Care. *Annals of family medicine*. 2017;15(2):175-82. Epub 2017/03/16. doi:  
1053 10.1370/afm.2014. PubMed PMID: 28289120; PubMed Central PMCID: PMCPMC5348238.

1054

1055 **Supporting information**

1056 ~~[S1 Table 1. Overview preliminary version attributes.](#)~~

1057 ~~[S2 Table 2. Overview training.](#)~~

1058 ~~[S1 File. Prisma scr checklist.](#)~~

1059 ~~[S1 Table 1. Overview preliminary version attributes.](#)~~

1060 ~~[S2 Table 2. Overview of training.](#)~~

1061 ~~[S1 Fig. Flow Chart.](#)~~

1062 ~~[S3 Table. Overview of the included articles.](#)~~

Dear Editor

Dear reviewers

We appreciate your extensive and constructive feedback on our manuscript.

We aimed to respond all of your remarks by point to point answers and changes in the manuscript.

Hopefully they will meet your expectations, otherwise we will make further adjustments.

Sincerely

Dagje Boeykens, on behalf of the co-authors

|   | Comments from the editor                                                                                                                                                                                                                                                       | Response                                                                                                                                                                                                                                                                                                                                                                                                                                                                                                                                                                                                                                                                                                                                                                                                                                                                                 | Changes in the manuscript                                                                                                                                                                                                                                                                                                                                                                                                                                                                                                                                                        |
|---|--------------------------------------------------------------------------------------------------------------------------------------------------------------------------------------------------------------------------------------------------------------------------------|------------------------------------------------------------------------------------------------------------------------------------------------------------------------------------------------------------------------------------------------------------------------------------------------------------------------------------------------------------------------------------------------------------------------------------------------------------------------------------------------------------------------------------------------------------------------------------------------------------------------------------------------------------------------------------------------------------------------------------------------------------------------------------------------------------------------------------------------------------------------------------------|----------------------------------------------------------------------------------------------------------------------------------------------------------------------------------------------------------------------------------------------------------------------------------------------------------------------------------------------------------------------------------------------------------------------------------------------------------------------------------------------------------------------------------------------------------------------------------|
| 1 | Please ensure that your manuscript meets PLOS ONE's style requirements, including those for file naming.                                                                                                                                                                       | Adjustments have been made to meet the PLOS ONE's style requirements.                                                                                                                                                                                                                                                                                                                                                                                                                                                                                                                                                                                                                                                                                                                                                                                                                    | Changes in the titles and references to figures and tables.                                                                                                                                                                                                                                                                                                                                                                                                                                                                                                                      |
| 2 | During the internal evaluation of the manuscript, we feel that this study fits within the scope of a Scoping Review. As such we please consider modifying your title to specify this. For instance "Goal-oriented care in primary care: a scoping review and concept analysis. | Thank you for this comment and we do agree with the fact that no specifications are given regarding the way how the literature search should be performed in a concept analysis according to Walker and Avant. From this perspective we can agree with the comment to think about adding 'scoping review' to the title because there are indeed some similarities. However, a scoping review and a concept-analysis are two different methodologies and we did not follow the guidelines from a scoping review (e.g. guidelines Joan Briggs institute or Arksey and O'Malley), but the guidelines from Walker and Avant. So we are a little bit puzzled by this request, in the one hand we would like to meet your comment, but on the other hand we feel that we cannot change the title and method because we did not perform a scoping review as it should have been done. From this | Our primary option would be not to change the title and keep the original title.<br><br>In case we should change, we would suggest the following title,<br><br>Goal-oriented care <b>for patients with chronic conditions or multimorbidity: a scoping review</b> and concept analysis<br><br>In the method section we added the following lines:<br><br><b>(L173 – method: step3) As the method of a concept analysis does not specify how the literature search has to be performed, this search was based on the method of a scoping review described by Levac (2010) [1]</b> |

|   |                                                                                                                                                 |                                                                                                                                                                                                                                                                                                                                                                                                                                                                                                                                                                                                                                                                                                                                                                                                             |                                                                                                                                                                                                                                                                                                                                                                                                                                                                                                                                                                    |
|---|-------------------------------------------------------------------------------------------------------------------------------------------------|-------------------------------------------------------------------------------------------------------------------------------------------------------------------------------------------------------------------------------------------------------------------------------------------------------------------------------------------------------------------------------------------------------------------------------------------------------------------------------------------------------------------------------------------------------------------------------------------------------------------------------------------------------------------------------------------------------------------------------------------------------------------------------------------------------------|--------------------------------------------------------------------------------------------------------------------------------------------------------------------------------------------------------------------------------------------------------------------------------------------------------------------------------------------------------------------------------------------------------------------------------------------------------------------------------------------------------------------------------------------------------------------|
|   |                                                                                                                                                 | <p>perspective, we would like to suggest no changes to the title (but perhaps add it as a key word).</p> <p>However, if this comment is a breaking point for being accepted as publication, and from the aspect to be identifiable by possible readers as a review article we can perfectly follow this comment. The way we have performed our literature search is similar to the way Levac describes how a literature study should be performed in scoping reviews. So, from this perspective we can follow to add 'scoping review' to the title, but then we suggest to add a few words to the method section and to the discussion section. In that case, please let us know.</p> <p>Levac D, Colquhoun H, O'Brien KK. Scoping studies: advancing the methodology. <i>Implement Sci.</i> 2010;5:69.</p> | <p><b><i>Related concepts such as patient-centered care, value-based care, etc. were not included as the method of concept analysis prescribes to deepen all the attributes of one concept.</i></b></p> <p>And add in the discussion section the following lines in the limitation section:</p> <p><b><i>(L666 – limitations) Since there is no specification given by Walker and Avant on how to conduct the literature review, we followed the guideline from a scoping review as described by Levac (2010). This could have influenced the results.</i></b></p> |
| 3 | In addition please provide a PRIMSA flow chart as Figure 1, list of studies as Table 1, and a completed PRISMA-Scr checklist as Supporting File | A PRISMA-Scr has been completed and also added to the supporting files. For us it was not that clear if the flow chart and tables have to be replaced to the supporting files, so if we need to do that, please let us know.                                                                                                                                                                                                                                                                                                                                                                                                                                                                                                                                                                                | A completed Prisma-Scr checklist has been added and presented at the supporting files.                                                                                                                                                                                                                                                                                                                                                                                                                                                                             |
| 4 | Finally, please include in your Methods section the date ranges over which you conducted the literature search.                                 | The date range has been added in the method section.                                                                                                                                                                                                                                                                                                                                                                                                                                                                                                                                                                                                                                                                                                                                                        | <b><i>(L 173 – select the literature): The literature search was conducted between January 2020 and April 2020.</i></b> A preliminary combination of...                                                                                                                                                                                                                                                                                                                                                                                                            |
| 5 | One of the noted authors is a group or consortium Primary Care Academy. In addition to naming the author group, please list the                 | A list of the individual authors and affiliations has been made and added to the acknowledgments. Prof. dr. Roy Remmen                                                                                                                                                                                                                                                                                                                                                                                                                                                                                                                                                                                                                                                                                      | /                                                                                                                                                                                                                                                                                                                                                                                                                                                                                                                                                                  |

|   |                                                                                                                                                                                                                                                                                                                                                                                                                                                                   |                                                                                                                                   |                                                                                                                                                                                                                                                                                                                                                                                                                                           |
|---|-------------------------------------------------------------------------------------------------------------------------------------------------------------------------------------------------------------------------------------------------------------------------------------------------------------------------------------------------------------------------------------------------------------------------------------------------------------------|-----------------------------------------------------------------------------------------------------------------------------------|-------------------------------------------------------------------------------------------------------------------------------------------------------------------------------------------------------------------------------------------------------------------------------------------------------------------------------------------------------------------------------------------------------------------------------------------|
|   | individual authors and affiliations within this group in the acknowledgments section of your manuscript. Please also indicate clearly a lead author for this group along with a contact email address.                                                                                                                                                                                                                                                            | <a href="mailto:roy.remmen@uantwerpen.be">roy.remmen@uantwerpen.be</a> ) has been indicated as the lead author of the consortium. |                                                                                                                                                                                                                                                                                                                                                                                                                                           |
| 6 | Please review your reference list to ensure that it is complete and correct. If you have cited papers that have been retracted, please include the rationale for doing so in the manuscript text, or remove these references and replace them with relevant current references. If you need to cite a retracted article, indicate the article's retracted status in the References list and also include a citation and full reference for the retraction notice. | The references list is checked and adjustments have been made.                                                                    | <p>21. Institute of Medicine Committee on the Future of Primary C. In: Donaldson M, Yordy K, Vanselow N, editors. Defining Primary Care: An Interim Report. Washington (DC): National Academies Press (US) Copyright 1994 by the National Academy of Sciences.; 1994.</p> <p>36. Purkale BA, Nagykaldi ZJ, Allahyar A, Todd R, Mold JW. Physicians' Response to Patients' Quality-of-Life Goals. J Am Board Fam Med. 2020;33(1):71-9.</p> |

| Comments from reviewer 1 |                                                                                                                                                                                                                                                                                                                                                                                              | Response                                                                                                                                                                                                                                                                                                                                                                                                                                                                                                                                                                                                                                        | Changes in the manuscript                                                                                                                                                                                                                                                                                                                                                                                                                                                                                                                                                                                           |
|--------------------------|----------------------------------------------------------------------------------------------------------------------------------------------------------------------------------------------------------------------------------------------------------------------------------------------------------------------------------------------------------------------------------------------|-------------------------------------------------------------------------------------------------------------------------------------------------------------------------------------------------------------------------------------------------------------------------------------------------------------------------------------------------------------------------------------------------------------------------------------------------------------------------------------------------------------------------------------------------------------------------------------------------------------------------------------------------|---------------------------------------------------------------------------------------------------------------------------------------------------------------------------------------------------------------------------------------------------------------------------------------------------------------------------------------------------------------------------------------------------------------------------------------------------------------------------------------------------------------------------------------------------------------------------------------------------------------------|
| Title                    |                                                                                                                                                                                                                                                                                                                                                                                              |                                                                                                                                                                                                                                                                                                                                                                                                                                                                                                                                                                                                                                                 |                                                                                                                                                                                                                                                                                                                                                                                                                                                                                                                                                                                                                     |
| 7                        | No mention is made of multimorbidity, a key concept within the paper. It should be added in.                                                                                                                                                                                                                                                                                                 | Indeed, the concept analysis also focusses on chronic conditions/ multimorbidity, so this is added to the title.                                                                                                                                                                                                                                                                                                                                                                                                                                                                                                                                | Goal-oriented care <b>for patients with chronic conditions and multimorbidity</b> in primary care: a concept analysis.                                                                                                                                                                                                                                                                                                                                                                                                                                                                                              |
| Introduction             |                                                                                                                                                                                                                                                                                                                                                                                              |                                                                                                                                                                                                                                                                                                                                                                                                                                                                                                                                                                                                                                                 |                                                                                                                                                                                                                                                                                                                                                                                                                                                                                                                                                                                                                     |
| 8                        | An assumption is made throughout that goal oriented care is likely to be better - can the authors provide any effectiveness data related to this topic? There are a number of trials in multimorbidity in which a goal setting approach is used. Likewise in the abstract intro.                                                                                                             | Goal-oriented care has indeed some potential benefits. As the outcomes of the effectiveness studies were considered as results of the analyzing process under 'consequences' of the result sections they were not specifically mentioned in the introduction. The outcomes of effectiveness studies have also been discussed in the 'discussion section' under the paragraph of 'consequences'. To meet the comment, we have given more attention to the potential outcomes of meeting the patients' needs in the introduction. Though, it should be noticed that more research is needed to elaborate on the effectiveness data on this topic. | (L86 – introduction) A possible way to overcome many of the challenges is to shift care back from 'what's the matter with the patient' to 'what matters to the patient'. It creates health care processes in which patients' needs are actively sought and met [2]. <b><i>Meeting those patients' needs and tailoring care more to what patients want in a co-creation process is assumed to result in better social well-being, physical well-being, and satisfaction for patients and healthcare providers [3].</i></b>                                                                                           |
| 9                        | Disease-specific care is positioned as opposite to goal oriented care. However, within a number of chronic disease management programs, goal setting plays a large part (although the patient centeredness of this may be debatable). Perhaps the authors need to more clearly distinguish between goal setting in care and goal-oriented care, which seems to be broader in their analysis. | Indeed, there is a need to distinguish between goal setting and goal-oriented care and we recognize that goal-setting plays a large part in the entire organization of (chronic) care.<br><br>This comment has been addressed in the introduction and in the discussion section.                                                                                                                                                                                                                                                                                                                                                                | <b><i>(L114 – introduction) Some healthcare providers might already assume that they practice goal-oriented care spontaneously, but there still is a lack of underpinning knowledge and guidance on how to provide goal-oriented care to patients The main pitfall in most of these goal-setting activities is that the goals are not necessarily related to the patients' needs and preferences while in goal-oriented care these patients' needs and preferences are put on the forefront and not necessarily health-related [4, 5]. From this perspective, goal-setting and goal-oriented care should be</i></b> |



|    |                                                                                                                                                                                                                                         |                                                                                                                                                                                                                                                                                                                                                                                                                   |                                                                                                                                                                                                                                                                                                                                                                                                                                                                                                                                                                                                                                                                                                                                                                                                                                                                                                                                                                                                                                                                  |
|----|-----------------------------------------------------------------------------------------------------------------------------------------------------------------------------------------------------------------------------------------|-------------------------------------------------------------------------------------------------------------------------------------------------------------------------------------------------------------------------------------------------------------------------------------------------------------------------------------------------------------------------------------------------------------------|------------------------------------------------------------------------------------------------------------------------------------------------------------------------------------------------------------------------------------------------------------------------------------------------------------------------------------------------------------------------------------------------------------------------------------------------------------------------------------------------------------------------------------------------------------------------------------------------------------------------------------------------------------------------------------------------------------------------------------------------------------------------------------------------------------------------------------------------------------------------------------------------------------------------------------------------------------------------------------------------------------------------------------------------------------------|
|    |                                                                                                                                                                                                                                         |                                                                                                                                                                                                                                                                                                                                                                                                                   | <p><i>taken together and focusing on the patient's needs and preferences.</i></p> <p><i>(L580 – discussion) In goal-oriented care it seems important to set goals based on the patients' needs and preferences (e.g; I want to take my grandchildren to school), while in other chronic disease management programs the emphasis is mainly still on health-related goals [6] (e.g. I want the patient to be able to walk without pain).</i></p>                                                                                                                                                                                                                                                                                                                                                                                                                                                                                                                                                                                                                  |
| 10 | Likewise, other related concepts such as shared decision making and patient centered care are only briefly touched upon and in either the intro or discussion or both need to be discussed as to how they relate to goal oriented care. | This is an important remark as we did not elaborate on the related concepts. We consider this concept analysis as a first and main step in learning more about goal-oriented care. The method of a concept analysis did not allow us to make an overview of the differences and similarities of the related concepts. Although, to meet this valuable comment we have added more information in the introduction. | (L93 – introduction) The concept of goal-oriented care has been launched and mentioned for the first time in 1991 by Mold who proposed the concept as an alternative way of providing care [7]. Later on, in 2012, Reuben and Tinetti took the concept of goal-oriented care a step forward by stating that care “must above all consider patients’ preferred outcomes” [8]. The focus on setting goals based on the patients’ needs and preferences rather than on health-related outcomes became one of the main novelties in chronic disease management [6]. <b><i>Not only could goal-oriented care be proposed as an important paradigm to overcome some of the new challenges for chronic patients [2], it might also corresponded to the original concept of evidence based medicine (EBM) [9]. EBM was first published by Sackett in 1996 who described three key components: 1. best external evidence, 2. individual clinical expertise, and 3. patients’ values and expectations [9]. Since the first description of EBM, multiple approaches</i></b> |

|  |  |  |                                                                                                                                                                                                                                                                                                                                                                                                                                                                                                                                                                                                                                                                                                                                                                                                                                                                                                                                                                                                                                                                                                                                                                                                                                                                                                                                                                                                                                                                                                                                                                               |
|--|--|--|-------------------------------------------------------------------------------------------------------------------------------------------------------------------------------------------------------------------------------------------------------------------------------------------------------------------------------------------------------------------------------------------------------------------------------------------------------------------------------------------------------------------------------------------------------------------------------------------------------------------------------------------------------------------------------------------------------------------------------------------------------------------------------------------------------------------------------------------------------------------------------------------------------------------------------------------------------------------------------------------------------------------------------------------------------------------------------------------------------------------------------------------------------------------------------------------------------------------------------------------------------------------------------------------------------------------------------------------------------------------------------------------------------------------------------------------------------------------------------------------------------------------------------------------------------------------------------|
|  |  |  | <p><i>and paradigms has been developed to compromise between those three components [10]. For example, patient-centered care (PCC), which is already a well-known and widely used concept, is defined as “providing care that is respectful of, and responsive to individual patient preferences, needs, and values and ensuring that patients values guides all clinical decisions” [10]. Shared-decision making, on the other hand, also strives to share evidence and engage patients in care as it is “an approach where clinicians and patients share the best available evidence when faced with the task of making decisions, and where patients are supported to consider options, and to achieve informed preferences” [11]. Goal-oriented care is proposed as a promising healthcare paradigm and approach to operationalize EBM and return to where it all started [8]. However, in contrast to the other approaches and paradigms, goal-oriented care is ill defined. Developing a common understanding on the concept could potentially contribute to the clarification and in-depth comparison between the related concepts and eventually lead to better use in clinical practice. However, some healthcare providers might already assume that they practice goal-oriented care spontaneously, but there still is a lack of underpinning knowledge and guidance on how to provide goal-oriented care to patients [4, 5]. As a first step in exploring the potential of goal-oriented care in chronic care, it is important to gain in-depth knowledge</i></p> |
|--|--|--|-------------------------------------------------------------------------------------------------------------------------------------------------------------------------------------------------------------------------------------------------------------------------------------------------------------------------------------------------------------------------------------------------------------------------------------------------------------------------------------------------------------------------------------------------------------------------------------------------------------------------------------------------------------------------------------------------------------------------------------------------------------------------------------------------------------------------------------------------------------------------------------------------------------------------------------------------------------------------------------------------------------------------------------------------------------------------------------------------------------------------------------------------------------------------------------------------------------------------------------------------------------------------------------------------------------------------------------------------------------------------------------------------------------------------------------------------------------------------------------------------------------------------------------------------------------------------------|

|        |                                                                                                                                                                                                                                                                      |                                                                                                                                                                                                                                                                                                                                                                                                                                                                                                                                                                                                                                                                                                               |                                                                                                                                                                                                                                                                                                                                                                                                                                                                |
|--------|----------------------------------------------------------------------------------------------------------------------------------------------------------------------------------------------------------------------------------------------------------------------|---------------------------------------------------------------------------------------------------------------------------------------------------------------------------------------------------------------------------------------------------------------------------------------------------------------------------------------------------------------------------------------------------------------------------------------------------------------------------------------------------------------------------------------------------------------------------------------------------------------------------------------------------------------------------------------------------------------|----------------------------------------------------------------------------------------------------------------------------------------------------------------------------------------------------------------------------------------------------------------------------------------------------------------------------------------------------------------------------------------------------------------------------------------------------------------|
|        |                                                                                                                                                                                                                                                                      |                                                                                                                                                                                                                                                                                                                                                                                                                                                                                                                                                                                                                                                                                                               | <p>on what goal-oriented care is about and how it can be generally described.</p> <p>As goal-oriented care could be well-suited in primary care, as this context is often the linchpin for patients with chronic conditions, this will be the focus of this study [12]. This study aimed to describe a structured approach to deepen the concept of goal-oriented care for patients with chronic conditions or multimorbidity in the primary care context.</p> |
| 11     | <p>Primary care is seen as the main focus of this paper, which makes sense, but there is little detail on collaboration and how goal oriented care would fit with collaborative approaches and whose responsibility in the primary care team it could/should be.</p> | <p>This is an important remark that we questioned ourselves already several times. Overall, the current literature pays little attention on (interprofessional) collaboration and how goal-oriented care could potentially facilitate this collaboration. Only one study (Vermunt et al.) mentioned who should take the lead during the process, suggesting different professionals including to be GP, nurse, practice nurse, psychological wellbeing practitioner. This information is now more specified. In a study of Mold it was suggested that occupational therapists as probably the most 'goal-oriented' profession without specifying that this profession should take the responsibility [13]</p> | <p><b><i>(L397 – results: care plan is based on patients' needs and preferences) To guide this interprofessional review, no specification was given about which profile would be the best fit for having the lead. Vermunt et al. (2017) illustrated this as they found variation in who (e.g. GP, nurse, practice nurse, psychological wellbeing practitioner) should contribute to goal-setting [4].</i></b></p>                                             |
| Method |                                                                                                                                                                                                                                                                      |                                                                                                                                                                                                                                                                                                                                                                                                                                                                                                                                                                                                                                                                                                               |                                                                                                                                                                                                                                                                                                                                                                                                                                                                |
| 12     | <p>I appreciate the literature searches are iterative but it would be useful to know the range of dates searched or at the very least the date of the most recent search, in order to contextualize the point at which this was done.</p>                            | <p>The date range is added to step 3 of the method section.</p>                                                                                                                                                                                                                                                                                                                                                                                                                                                                                                                                                                                                                                               | <p><b><i>(L173 – method: step 3) The literature search was conducted between January 2020 and April 2020. A preliminary combination of...</i></b></p>                                                                                                                                                                                                                                                                                                          |

|    |                                                                                                                                                                                                                                                                                           |                                                                                                                                                                                                                                                                                                                                                                                                                                                                                                                                                                                                                                                                                                                                                          |                                                                                                                                                                                                                                                                                                                                                                                                                                                                            |
|----|-------------------------------------------------------------------------------------------------------------------------------------------------------------------------------------------------------------------------------------------------------------------------------------------|----------------------------------------------------------------------------------------------------------------------------------------------------------------------------------------------------------------------------------------------------------------------------------------------------------------------------------------------------------------------------------------------------------------------------------------------------------------------------------------------------------------------------------------------------------------------------------------------------------------------------------------------------------------------------------------------------------------------------------------------------------|----------------------------------------------------------------------------------------------------------------------------------------------------------------------------------------------------------------------------------------------------------------------------------------------------------------------------------------------------------------------------------------------------------------------------------------------------------------------------|
| 13 | 'confirmed the first results' unclear what this means - no new studies found? or no new concepts identified?                                                                                                                                                                              | Indeed, this was unclear. We meant that no new studies were identified. Further details on this method part has been added.                                                                                                                                                                                                                                                                                                                                                                                                                                                                                                                                                                                                                              | (L183 – method: step3) In a second phase, CINAHL, OTSeeker, PsycINFO and Web of Science were consulted and confirmed the first results <b>as no new studies were identified.</b>                                                                                                                                                                                                                                                                                           |
| 14 | In the inclusion criteria, it is unclear how much of a focus was needed on goal oriented care to be included - was there a minimum level of discussion or characterization required? How many authors determined it had sufficient focus? To me this would seem to be difficult to judge. | It was indeed difficult to judge if a study should be included or not as goal-oriented care is a poorly defined concept (this was the reason why we conducted this concept analysis in the first place). However, by predefining the inclusion criteria we tried to make this choice more objective. Further, the studies were discussed with the co-authors to evaluate if they could contribute to the theoretical building of an understanding on goal-oriented care. Each co-author had an open and reflexive view to the articles so the risk of bias was reduced. We also strived for consensus with the authors in several discussion round that were held to increase reliability of the inclusion process. We added this in the method section. | (L 217 – method: step 4) The determination of the attributes started with a discussion of four key articles [14-17] selected by the first author based on the divers approaches of goal-oriented care <b>and presented to the research group.</b><br><br><b>(L223 – method: step 4) In a second phase, new articles were added and analyzed based on the same method as the key articles until all relevant literature (based on the inclusion criteria) was included.</b> |
| 15 | Clarify that all paper types were included.                                                                                                                                                                                                                                               | A sentence is added to make this more clear.                                                                                                                                                                                                                                                                                                                                                                                                                                                                                                                                                                                                                                                                                                             | <b>(L214 – method: step 3) There was no restriction by study design to gain as much insight in goal-oriented from different perspectives.</b>                                                                                                                                                                                                                                                                                                                              |
| 16 | "a chronic condition"? This paper is focused on multimorbidity so surely it should be >1?                                                                                                                                                                                                 | The paper is focused on both, just one chronic condition or multiple conditions (multimorbidity). Changes have been made.                                                                                                                                                                                                                                                                                                                                                                                                                                                                                                                                                                                                                                | (L206 – method: step 3) and (c) focusing on patients with <b>one or more chronic conditions.</b>                                                                                                                                                                                                                                                                                                                                                                           |
| 17 | Papers included were English only. It would be interesting to know how many papers were in another language as it seems like that there may be cultural differences that could not be picked up?                                                                                          | This will indeed be interesting to identify potential cultural differences. During the literature search, no specific filters were used. This allowed us to, indeed, have knowledge about papers in other languages and eventually potential cultural differences.                                                                                                                                                                                                                                                                                                                                                                                                                                                                                       | In the limitation section we have added the following:<br><br><b>(L674 – limitations) The literature that was included in this study were only English written and peer reviewed. It would however be</b>                                                                                                                                                                                                                                                                  |

|         |                                                                                                                                                                                                                                                                                      |                                                                                                                                                                                                                                                                                                                                                                                                                                                                                                                                                                           |                                                                                                                                    |
|---------|--------------------------------------------------------------------------------------------------------------------------------------------------------------------------------------------------------------------------------------------------------------------------------------|---------------------------------------------------------------------------------------------------------------------------------------------------------------------------------------------------------------------------------------------------------------------------------------------------------------------------------------------------------------------------------------------------------------------------------------------------------------------------------------------------------------------------------------------------------------------------|------------------------------------------------------------------------------------------------------------------------------------|
|         |                                                                                                                                                                                                                                                                                      | <p>However, no studies in other languages could be found by means of our search strategy. Though, English written papers could also provide insight in differences relating to context and culture, but the included articles related to Western countries so at this moment no differences could be identified. We added this in the limitation section.</p>                                                                                                                                                                                                             | <p><b><i>interesting to add also non-English papers to be able to capture more differences (e.g. cultural differences)</i></b></p> |
| Results |                                                                                                                                                                                                                                                                                      |                                                                                                                                                                                                                                                                                                                                                                                                                                                                                                                                                                           |                                                                                                                                    |
| 18      | Results: flow chart too low res to view.                                                                                                                                                                                                                                             | <p>A new flow chart has been made with better resolution. Following the editor's suggestion this flowchart has now been placed in the supplementary files.</p>                                                                                                                                                                                                                                                                                                                                                                                                            |                                                                                                                                    |
| 19      | <p>Table 2 is clear but would appreciate adding further details on methods, plus perhaps contribution it made to the concept analysis (could add in numbers from table 3 to indicate where contributed to?). Some study methods are blank? I don't see the relevance of journal.</p> | <p>Table 2 is supplemented with more information about the method. Further, references are added in Table 3 so the link to the corresponding article is more clear.</p>                                                                                                                                                                                                                                                                                                                                                                                                   | <p>Table 2 is completed and references are added in Table 3.</p>                                                                   |
| 20      | <p>p18 patient's needs and preferences... within this section I wondered if any of the papers had picked up on expectation management, which would seem to be an important part of the process which is not really considered here.</p>                                              | <p>It is an interesting remark to link the paragraph of the patients' needs and preferences to expectation management. However, after rereading the included articles none of them relate to that. What we see in the literature that has been published after the literature search was finalized, is that it is important to find the underlying values of goals patients set [18]. We agree that this is an important issue, but based on the literature we have reviewed we cannot provide an answer and therefore we did not make any changes in the manuscript.</p> | <p>No changes have been made in the manuscript.</p>                                                                                |

|    |                                                                                                                                                                                                                                                                                                                                                                                                                                                                                  |                                                                                                                                                                                                                                                     |                                                                                                                                                                                                                                                                                                                                                                                                                                                                                                                                                                                                                                                                                                                                                                                                                                                                                                                                                                                                                                                                                                                                                                                                                                                                |
|----|----------------------------------------------------------------------------------------------------------------------------------------------------------------------------------------------------------------------------------------------------------------------------------------------------------------------------------------------------------------------------------------------------------------------------------------------------------------------------------|-----------------------------------------------------------------------------------------------------------------------------------------------------------------------------------------------------------------------------------------------------|----------------------------------------------------------------------------------------------------------------------------------------------------------------------------------------------------------------------------------------------------------------------------------------------------------------------------------------------------------------------------------------------------------------------------------------------------------------------------------------------------------------------------------------------------------------------------------------------------------------------------------------------------------------------------------------------------------------------------------------------------------------------------------------------------------------------------------------------------------------------------------------------------------------------------------------------------------------------------------------------------------------------------------------------------------------------------------------------------------------------------------------------------------------------------------------------------------------------------------------------------------------|
| 21 | <p>Additionally on page 19 I wondered what the implications were when people's goals went beyond the remit of healthcare professionals in terms of their aims or their barriers and facilitators (e.g. finances, caring responsibilities) and whether the responsibility should be on the HCP to address these kind of issues as part of holistic care or the patient as part of their own self-management? This could also be picked up on the discussion and implications.</p> | <p>Thank you for this comment. Some authors, however limited, touched upon this issue. We have addressed this comment in the discussion section.</p>                                                                                                | <p><b><i>(L394 – results: care plan is based on patients’ needs and preferences) In case that providers are confronted with patients’ goals that are out of their own scope, they could benefit from an interprofessional review as they are enabled to discuss with and hand over to others with the needed expertise. This could improve the coordination of the care plans between the different providers and facilitate integrated care delivery [6, 17, 19]. To guide this interprofessional review, no specification was given about which profile would be the best fit for having the lead. Vermunt et al. (2017) illustrated this as they found variation in who (e.g. GP, nurse, practice nurse, psychological wellbeing practitioner) should contribute to goal-setting [4].</i></b></p> <p>(L 631 – discussion) Therefore training should also include the interprofessional perspective to facilitate a uniform attitude towards the patients’ goals and principles of goal-oriented care in the entire team. <b><i>This will potential support providers to learn from and with each other’s’ expertise and enable discussion between them in case that, for example, patients set goals that our out of the remit of the provider.</i></b></p> |
| 22 | <p>It is somewhat unclear who should be leading/doing the care plan. Whilst an interprofessional approach is emphasized, there is little detail on whether a specific role (e.g. care coordinator or similar) would be required</p>                                                                                                                                                                                                                                              | <p>We do agree with this comment and agree that interprofessional collaboration is an important topic to relate with goal-oriented care. Besides Vermunt (2010) little attention is given in the contemporary literature describing the concept</p> | <p><b><i>(L394 – results: care plan is based on patients’ needs and preferences) In case that providers are confronted with patients’ goals that are out of their own scope, they could benefit from an interprofessional review as they are enabled to</i></b></p>                                                                                                                                                                                                                                                                                                                                                                                                                                                                                                                                                                                                                                                                                                                                                                                                                                                                                                                                                                                            |

|    |                                                                                                                                                                                                                                                                |                                                                                                                                                                                                                                                                                                                                                                                                                                                                                                                                                                                                                                                                                                                                          |                                                                                                                                                                                                                                                                                                                                                                                                                                                                                                                                                                                     |
|----|----------------------------------------------------------------------------------------------------------------------------------------------------------------------------------------------------------------------------------------------------------------|------------------------------------------------------------------------------------------------------------------------------------------------------------------------------------------------------------------------------------------------------------------------------------------------------------------------------------------------------------------------------------------------------------------------------------------------------------------------------------------------------------------------------------------------------------------------------------------------------------------------------------------------------------------------------------------------------------------------------------------|-------------------------------------------------------------------------------------------------------------------------------------------------------------------------------------------------------------------------------------------------------------------------------------------------------------------------------------------------------------------------------------------------------------------------------------------------------------------------------------------------------------------------------------------------------------------------------------|
|    | for this process to take place.                                                                                                                                                                                                                                | of goal oriented care who should take the lead or responsibility in the process. We have added a few lines to address this issue.                                                                                                                                                                                                                                                                                                                                                                                                                                                                                                                                                                                                        | <b><i>discuss with and hand over to other providers with the needed expertise. This could improve the coordination of the care plans between the different providers and facilitate integrated care delivery [6, 17, 19]. To guide this interprofessional review, no specification was given about which profile would be the best fit for having the lead. Vermunt et al. illustrated this as they found variation in who (e.g. GP, nurse, practice nurse, psychological wellbeing practitioner) should contribute to goal-setting [4].</i></b>                                    |
| 23 | There's also little differentiation throughout as to whether the goals set are meant to be actioned by the patient or providers, which is an important consideration when considering measurement and review and goal level.                                   | This is an important remark as this will be one of the main concerns of providers and patients to apply goal-oriented care. However, in the current (included) literature no specification was given regarding the person who should action the goals. What we saw in the literature is that the provider should support patients in undertaking action to achieve their goals, but that they should let the patients in their own responsibility in whether or not striving for their goals. It is however important to notice that in goal-oriented care it is most of all important to identify the patients' needs and preferences to guide the conversations and interaction rather than focusing on achieving the patients' goals. | (L: 699 – strengths, limitations, and recommendations) Goal-oriented care shows the potential to be a way forward for patients with chronic conditions and multimorbidity. However, further research is needed to translate the current knowledge on the concept of goal-oriented care into a tangible workflow process of care that entails the three stages. This workflow should consists of tools to prepare patients and providers to offer goal-oriented care. This could contribute to finding a common ground in the goals and implementing goal-oriented care in practice. |
| 24 | Throughout it would be good to know when a paper is quoted, the type of data/expertise it is coming from and whether these characterizations are consistent across methods (e.g. whether characterized in the same way from a detailed conversational analysis | Thank you for this suggestion. It indeed is interesting to get an overview of the included articles and the method they have used. Therefore we have integrated the previous comment (18) to complete Table 2 and make the link with Table 3. Together with a                                                                                                                                                                                                                                                                                                                                                                                                                                                                            | <b><i>(L257 – method: step 3) These articles represented a broad range of study types: 4 systematic reviews, 4 experimental studies (e.g. randomized controlled trial), 13 qualitative studies, 3 survey studies, 1 concept analysis, 1 methodology paper, 4 reviews, 2 position</i></b>                                                                                                                                                                                                                                                                                            |

|    |                                                                                                                                                                                                                                                            |                                                                                                                                                                                                                                                                                                              |                                                                                                                                                                                                                                                                                                                                                                                                                                                                                                                                                                                                                                                                                                                                                                                                                                                                                                                                                                                                                        |
|----|------------------------------------------------------------------------------------------------------------------------------------------------------------------------------------------------------------------------------------------------------------|--------------------------------------------------------------------------------------------------------------------------------------------------------------------------------------------------------------------------------------------------------------------------------------------------------------|------------------------------------------------------------------------------------------------------------------------------------------------------------------------------------------------------------------------------------------------------------------------------------------------------------------------------------------------------------------------------------------------------------------------------------------------------------------------------------------------------------------------------------------------------------------------------------------------------------------------------------------------------------------------------------------------------------------------------------------------------------------------------------------------------------------------------------------------------------------------------------------------------------------------------------------------------------------------------------------------------------------------|
|    | perspective vs an overview paper)                                                                                                                                                                                                                          | descriptive overview of the diverse study types we tried to provide this overview.                                                                                                                                                                                                                           | <b><i>papers, 1 background paper, 1 status report, 1 commentary, 1 opinion paper, and 1 perspective.</i></b><br><br><b><i>+ Table 2 and 3</i></b>                                                                                                                                                                                                                                                                                                                                                                                                                                                                                                                                                                                                                                                                                                                                                                                                                                                                      |
| 25 | The case boxes are cut off so I can't comment on them. Box 3 states 'her physician does not allow' - does this mean he is preventing Mary from travelling, which does not seem like something he would be able to, or is this perhaps a slight miswording? | Our excuses for the missing parts of the cases. Also reviewer 2,3, and 4 comment (32 & 37) that the case of Mary could seem slightly unrealistic. To meet these comments, the case has been rewritten.                                                                                                       | Mary is a 40-year old mother of two young children and dealing with obesity since her childhood. <b><i>Due to her weight, she has a lot of joints pain and is short of breath which limits her exercising capacity. Her children would love nothing more than their mother play with them. Unfortunately, she is not able to play soccer or jump on the trampoline because of the pain. The pain becomes too much for her and after long hesitation she discusses this with her physician. The only thing she wants is to play and interact with her children as painless as possible and therefore asks her physician to prescribe some medication. Her physician does not support medication, but instructs her to first strive for a healthy weight as a solution to relieve the pain. This is not aligned with the wishes of Mary who only wanted a short-term solution to be able to play with her children.</i></b> In the end, she leaves the consultation room with a referral to a dietitian and sport coach. |
| 26 | In the patient preparedness part, could any conclusions be drawn about the best ways to prepare patients?                                                                                                                                                  | Thank you for this interesting remark, but unfortunately no in-depth information was given in the literature regarding the way how patients should be prepared. It is something we also questioned ourselves. We added specifically in the discussion section that this will be subject to further research. | (L683 – strengths, limitations, and recommendations) One of the knowledge gaps revealed in this concept analysis is the lack of knowledge on what patients' goals are set, how goal-oriented care is delivered, and how it is best put into practice in both one-on-one interactions between patients and providers                                                                                                                                                                                                                                                                                                                                                                                                                                                                                                                                                                                                                                                                                                    |



|            |                                                                                                                                                                                                                                                                                                                                                                                                                |                                                                                                                                                                                                                                                                                                                                                                                                                                                                  |                                                                                                                                                                                                                                                                                                                                                                                                                                                                                                                                                                                                                                                                                                                                                                                                                                                                                                                                                                                                                                                                             |
|------------|----------------------------------------------------------------------------------------------------------------------------------------------------------------------------------------------------------------------------------------------------------------------------------------------------------------------------------------------------------------------------------------------------------------|------------------------------------------------------------------------------------------------------------------------------------------------------------------------------------------------------------------------------------------------------------------------------------------------------------------------------------------------------------------------------------------------------------------------------------------------------------------|-----------------------------------------------------------------------------------------------------------------------------------------------------------------------------------------------------------------------------------------------------------------------------------------------------------------------------------------------------------------------------------------------------------------------------------------------------------------------------------------------------------------------------------------------------------------------------------------------------------------------------------------------------------------------------------------------------------------------------------------------------------------------------------------------------------------------------------------------------------------------------------------------------------------------------------------------------------------------------------------------------------------------------------------------------------------------------|
|            |                                                                                                                                                                                                                                                                                                                                                                                                                |                                                                                                                                                                                                                                                                                                                                                                                                                                                                  | and in interprofessional collaboration.<br><b>Regarding patients it is important to gain more insight in how they are preferably prepared for discussing their personal goals.</b>                                                                                                                                                                                                                                                                                                                                                                                                                                                                                                                                                                                                                                                                                                                                                                                                                                                                                          |
| Discussion |                                                                                                                                                                                                                                                                                                                                                                                                                |                                                                                                                                                                                                                                                                                                                                                                                                                                                                  |                                                                                                                                                                                                                                                                                                                                                                                                                                                                                                                                                                                                                                                                                                                                                                                                                                                                                                                                                                                                                                                                             |
| 27         | Should be a bit wider not just in terms of the concept but how it fits in more widely. There is overall a lack of discussion around the issues of provider-provider collaboration (for example frequently care plans however holistically developed are not shared across providers, particularly those with different IT systems) and healthcare professional time (which would seem to be the major barrier) | This is an important remark as the provider-provider collaboration and the aspect of time of healthcare professionals seem to be important aspects that relate to goal-oriented care. However, no included articles mentioned something about collaboration nor time. It seems logic that providers need sufficient time to have a goal-oriented care conversation, etc. but for this discussion we have chosen to focus on what is described in the literature. | (L683 – strengths, limitations, and recommendations) One of the knowledge gaps revealed in this concept analysis is the lack of knowledge on what patients’ goals are set, how goal-oriented care is delivered, <b>and how it is best put into practice in both one-on-one interactions between patients and providers and in interprofessional collaboration.</b> Regarding patients it is important to gain more insight in how they are preferably prepared for discussing their personal goals.<br><br>(L689 – strengths, limitations, and recommendations) Initiating the development of an evaluation method could enable future intervention studies to gain more insight in the consequences of goal-oriented care and to make results comparable. <b>This future research could provide insight in how effective goal-oriented care could potentially be which will be important to convince providers and policy makers of the benefits. These results might also inform the healthcare system in which resources they need to facilitate goal-oriented care.</b> |
| 28         | Couple of English corrections needed throughout: L109 chronical should be                                                                                                                                                                                                                                                                                                                                      | The corrections has been made.                                                                                                                                                                                                                                                                                                                                                                                                                                   |                                                                                                                                                                                                                                                                                                                                                                                                                                                                                                                                                                                                                                                                                                                                                                                                                                                                                                                                                                                                                                                                             |

|  |                                                       |  |  |
|--|-------------------------------------------------------|--|--|
|  | chronically, L211 independency should be independence |  |  |
|--|-------------------------------------------------------|--|--|

| Comments from reviewer 2 |                                                                                                                                                                                                                                                                                                                                                                                                                                                                                                                    | Response                                                                                                                                                                                                                                                                                                                                                                                                                                                                                                                                                                                                                                                                                                                                                                                                  | Changes in the manuscript                                                                                                                                                                                                                                                                                                                                                                                                                                                                                                                                                                                                                                                                                                                                                                                                                                                                                                                                                                                                                                                                                                                                                                                                                                                                          |
|--------------------------|--------------------------------------------------------------------------------------------------------------------------------------------------------------------------------------------------------------------------------------------------------------------------------------------------------------------------------------------------------------------------------------------------------------------------------------------------------------------------------------------------------------------|-----------------------------------------------------------------------------------------------------------------------------------------------------------------------------------------------------------------------------------------------------------------------------------------------------------------------------------------------------------------------------------------------------------------------------------------------------------------------------------------------------------------------------------------------------------------------------------------------------------------------------------------------------------------------------------------------------------------------------------------------------------------------------------------------------------|----------------------------------------------------------------------------------------------------------------------------------------------------------------------------------------------------------------------------------------------------------------------------------------------------------------------------------------------------------------------------------------------------------------------------------------------------------------------------------------------------------------------------------------------------------------------------------------------------------------------------------------------------------------------------------------------------------------------------------------------------------------------------------------------------------------------------------------------------------------------------------------------------------------------------------------------------------------------------------------------------------------------------------------------------------------------------------------------------------------------------------------------------------------------------------------------------------------------------------------------------------------------------------------------------|
| Results                  |                                                                                                                                                                                                                                                                                                                                                                                                                                                                                                                    |                                                                                                                                                                                                                                                                                                                                                                                                                                                                                                                                                                                                                                                                                                                                                                                                           |                                                                                                                                                                                                                                                                                                                                                                                                                                                                                                                                                                                                                                                                                                                                                                                                                                                                                                                                                                                                                                                                                                                                                                                                                                                                                                    |
| 29                       | As the authors mentioned, there are similar concepts with Goal-oriented care. For example, Patient-Centered Clinical Method, Value-Based Practice or Expert Generalist Practice have proposed similar frameworks in primary care settings. I think the authors need to mention the difference between Goal-oriented care and the other concepts and why the authors chose Goal-oriented care in the Background and Discussion section. This is important for readers who are not familiar with Goal-oriented care. | <p>This is an important remark as we did not elaborate on the related concepts. We consider this concept analysis as a first and main step in learning more about goal-oriented care. Based on this methodology and the results we were not able to make an overview of the differences and similarities of other concepts. Therefore, a critical review can be set up to perform in-depth comparison between the related concepts.</p> <p>Also reviewer 1 (comment 9,10) and 3 (comment 34,35) have commented on the absence of the link with the related concepts. To address these comments, we have added more clarification on why we have chosen for the concept of goal-oriented care and where the other concepts could be placed. In addition, we addressed this gap in the recommendations.</p> | <p>(L95 – introduction) The concept of goal-oriented care has been launched and mentioned for the first time in 1991 by Mold who proposed the concept as an alternative way of providing care [7]. Later on, in 2012, Reuben and Tinetti took the concept of goal-oriented care a step forward by stating that care “must above all consider patients’ preferred outcomes” [8]. The focus on setting goals based on the patients’ needs and preferences rather than on health-related outcomes became one of the main novelties in chronic disease management [6]. <b><i>Not only could goal-oriented care be proposed as an important paradigm to overcome some of the new challenges for chronic patients [2], it might also corresponded to the original concept of evidence based medicine (EBM) [9]. EBM was first published by Sackett in 1996 who described three key components: 1. best external evidence, 2. individual clinical expertise, and 3. patients’ values and expectations [9]. Since the first description of EBM, multiple approaches and paradigms has been developed to compromise between those three components [10]. For example, patient-centered care (PCC), which is already a well-known and widely used concept, is defined as “providing care that is</i></b></p> |

|  |  |  |                                                                                                                                                                                                                                                                                                                                                                                                                                                                                                                                                                                                                                                                                                                                                                                                                                                                                                                                                                                                                                                                                                                                                                                                                                                                                                                                                                                                                                                                                                                                                                                           |
|--|--|--|-------------------------------------------------------------------------------------------------------------------------------------------------------------------------------------------------------------------------------------------------------------------------------------------------------------------------------------------------------------------------------------------------------------------------------------------------------------------------------------------------------------------------------------------------------------------------------------------------------------------------------------------------------------------------------------------------------------------------------------------------------------------------------------------------------------------------------------------------------------------------------------------------------------------------------------------------------------------------------------------------------------------------------------------------------------------------------------------------------------------------------------------------------------------------------------------------------------------------------------------------------------------------------------------------------------------------------------------------------------------------------------------------------------------------------------------------------------------------------------------------------------------------------------------------------------------------------------------|
|  |  |  | <p><i>respectful of, and responsive to individual patient preferences, needs, and values and ensuring that patients values guides all clinical decisions” [10]. Shared-decision making, on the other hand, also strives to share evidence and engage patients in care as it is “an approach where clinicians and patients share the best available evidence when faced with the task of making decisions, and where patients are supported to consider options, and to achieve informed preferences” [11]. Goal-oriented care is proposed as a promising healthcare paradigm and approach to operationalize EBM and return to where it all started [8]. However, in contrast to the other approaches and paradigms, goal-oriented care is ill defined. Developing a common understanding on the concept could potentially contribute to the clarification and in-depth comparison between the related concepts and eventually lead to better use in clinical practice. However, some healthcare providers might already assume that they practice goal-oriented care spontaneously, but there still is a lack of underpinning knowledge and guidance on how to provide goal-oriented care to patients [4, 5]. As a first step in exploring the potential of goal-oriented care in chronic care, it is important to gain in-depth knowledge on what goal-oriented care is about and how it can be generally described.</i></p> <p>As goal-oriented care could be well-suited in primary care, as this context is often the linchpin for patients with chronic conditions, this will be</p> |
|--|--|--|-------------------------------------------------------------------------------------------------------------------------------------------------------------------------------------------------------------------------------------------------------------------------------------------------------------------------------------------------------------------------------------------------------------------------------------------------------------------------------------------------------------------------------------------------------------------------------------------------------------------------------------------------------------------------------------------------------------------------------------------------------------------------------------------------------------------------------------------------------------------------------------------------------------------------------------------------------------------------------------------------------------------------------------------------------------------------------------------------------------------------------------------------------------------------------------------------------------------------------------------------------------------------------------------------------------------------------------------------------------------------------------------------------------------------------------------------------------------------------------------------------------------------------------------------------------------------------------------|

|    |                                                                                                                                                                                                                              |                                                                                                                                                                                                      |                                                                                                                                                                                                                                                                                                                                                                                                                                                                                                                                                                                                                                                         |
|----|------------------------------------------------------------------------------------------------------------------------------------------------------------------------------------------------------------------------------|------------------------------------------------------------------------------------------------------------------------------------------------------------------------------------------------------|---------------------------------------------------------------------------------------------------------------------------------------------------------------------------------------------------------------------------------------------------------------------------------------------------------------------------------------------------------------------------------------------------------------------------------------------------------------------------------------------------------------------------------------------------------------------------------------------------------------------------------------------------------|
|    |                                                                                                                                                                                                                              |                                                                                                                                                                                                      | <p>the focus of this study [12]. This study aimed to describe a structured approach to deepen the concept of goal-oriented care for patients with chronic conditions or multimorbidity in the primary care context.</p> <p>(702 – strengths, limitations, and recommendations) This workflow should include the skills and tools so patients and providers can find a common ground in the goals and are supported in implementing goal-oriented care in practice. <b><i>Then, when goal-oriented care is a well understood concept it is possible to perform an in-depth comparison between related concepts (e.g. patient-centered care).</i></b></p> |
| 30 | <p>Please clarify how to “analyze” the included articles to define attributes in step 4. This can be helpful to understand the process of emerging codes for the readers who are not familiar with the concept analysis.</p> | <p>More clarification on the analyzing process is written down and an extra Table with an example of data extraction is given as illustration. This will provide more insight into the analyses.</p> | <p><b><i>(L219 – method: step 4) Similar to a qualitative, thematic analysis, the key articles were analyzed based on an open coding and then grouped into codes. (Table 3 – example of data analysis). These codes were then presented to and discussed with the co-authors. Based on this discussion codes were translated into attributes.</i></b></p>                                                                                                                                                                                                                                                                                               |

|    | Comments from reviewer 3                                                                                                                                                                                                                   | Response                                                                                                                                                                                                                                                                                                                                                                                                           | Changes in the manuscript                                                                                                                                                                                                                                                                                                                                                                                                                                                                                                                                                                                                                                                                                                                                                                                                                                                                                                                                                                                                                                                                |
|----|--------------------------------------------------------------------------------------------------------------------------------------------------------------------------------------------------------------------------------------------|--------------------------------------------------------------------------------------------------------------------------------------------------------------------------------------------------------------------------------------------------------------------------------------------------------------------------------------------------------------------------------------------------------------------|------------------------------------------------------------------------------------------------------------------------------------------------------------------------------------------------------------------------------------------------------------------------------------------------------------------------------------------------------------------------------------------------------------------------------------------------------------------------------------------------------------------------------------------------------------------------------------------------------------------------------------------------------------------------------------------------------------------------------------------------------------------------------------------------------------------------------------------------------------------------------------------------------------------------------------------------------------------------------------------------------------------------------------------------------------------------------------------|
|    | Method                                                                                                                                                                                                                                     |                                                                                                                                                                                                                                                                                                                                                                                                                    |                                                                                                                                                                                                                                                                                                                                                                                                                                                                                                                                                                                                                                                                                                                                                                                                                                                                                                                                                                                                                                                                                          |
| 31 | Regarding the methods I assume there is a good reason why related concepts including patient-centered care, shared decision making and value based medicine were not included in the search string, but could this be argued more clearly? | <p>Indeed, these concepts were not included in the literature search. The method of a concept analysis prescribed to focus on deepening just one concept. This is made clearer in the manuscript.</p> <p>However, since reviewer 1 (9,10) and 2 (28) also comment on the absence of elaborating on relating concepts (more or less) we have added more information on that in the introduction and discussion.</p> | <p><b><i>(L181 – method: select the literature) Related concepts such as patient-centered care, value-based care, etc. were not included as the method of concept analysis prescribes to deepen all the attributes of one concept.</i></b></p> <p>(L207 – method: step 3) Exclusion criteria: (a) focusing on single-disease management, (b) goals regarding disease-specific outcomes (e.g. cancer or diabetes), (c) focusing on goal-oriented care in a specific context (e.g. rehabilitation center), <b><i>and (d) specifically mentioning patient-centered care, shared-decision making, etc. as they will hamper the understanding of specifically goal-oriented care.</i></b></p> <p>(L702 – discussion) This workflow should include the skills and tools so patients and providers can find a common ground in the goals and are supported in implementing goal-oriented care in practice. <b><i>Then, when goal-oriented care is a well understood concept it is possible to perform an in-depth comparison between related concepts (e.g. patient-centered care).</i></b></p> |

| Results |                                                                                                                                                                                                                                                                                     |                                                                                                                                                                                                                                                                                                                                                                                                                                                                                                                                                                               |                                                                                                                                                                                                                                                                                                                                                                                                                                                                                                                                                                           |
|---------|-------------------------------------------------------------------------------------------------------------------------------------------------------------------------------------------------------------------------------------------------------------------------------------|-------------------------------------------------------------------------------------------------------------------------------------------------------------------------------------------------------------------------------------------------------------------------------------------------------------------------------------------------------------------------------------------------------------------------------------------------------------------------------------------------------------------------------------------------------------------------------|---------------------------------------------------------------------------------------------------------------------------------------------------------------------------------------------------------------------------------------------------------------------------------------------------------------------------------------------------------------------------------------------------------------------------------------------------------------------------------------------------------------------------------------------------------------------------|
| 32      | On page 18: what is the confusion in the paragraph above exactly? Different aspects are mentioned, but what is the tension?                                                                                                                                                         | This was indeed unclear, to clarify more on this tension, the sentences have been rewritten.                                                                                                                                                                                                                                                                                                                                                                                                                                                                                  | <b><i>(L357 – results: patients’ needs and preferences) Other authors recommended that goals should be a combination of both the patients’ goals and the providers’ goals which in turn is related to goal-negotiation [16, 20]. In conclusion, no overall understanding on the goals could be formulated. Besides this lack in understanding, there also seems to be ambiguity about the categorization of goals.</i></b> Some authors emphasized that goals should contain core values of patients (e.g. the broader aspects that matter most to the patient) [6, 17] . |
| 33      | Regarding the results: Isn’t there literature that defines goal oriented by stating what it is ‘not’?                                                                                                                                                                               | It is an interesting remark, but for this study we had to start from scratch to deepen the understanding of goal-oriented care. By using the method of a concept analysis we searched for what goal-oriented care ‘is’. The approach of learning about a concept through what it is not is in the method of a concept analysis defined as contrary case. From this perspective, we have given information about what it is not, unfortunately we did not find any information in the literature about what it is not and we have therefore made no changes in the manuscript. | No changes have been made in the manuscript.                                                                                                                                                                                                                                                                                                                                                                                                                                                                                                                              |
| 34      | Cases: The cases are not fully readable in the version of the paper that I had access to, but I think you need to work a bit on them to make them more believable or better: find actual cases. E.g. case 1: for most CVD / DM patients cycling is actually recommended and case 3: | Our excuses for the missing parts in the cases. Some changes have been made to be more realistic. We hope that this suits more now.                                                                                                                                                                                                                                                                                                                                                                                                                                           | Joseph, 68- year old suffers from diabetes, hypertension and <b><i>chronic obstructive pulmonary disease.</i></b><br>Mary is a 40-year old mother of two young children and dealing with obesity since her childhood. <b><i>Due to her weight, she has a lot of</i></b>                                                                                                                                                                                                                                                                                                   |

|            |                                                                                                                                                                                                                                                                                                                              |                                                                                                                                                                                                                                                                                               |                                                                                                                                                                                                                                                                                                                                                                                                                                                                                                                                                                                                                                                                                                                                                                                                                                                                           |
|------------|------------------------------------------------------------------------------------------------------------------------------------------------------------------------------------------------------------------------------------------------------------------------------------------------------------------------------|-----------------------------------------------------------------------------------------------------------------------------------------------------------------------------------------------------------------------------------------------------------------------------------------------|---------------------------------------------------------------------------------------------------------------------------------------------------------------------------------------------------------------------------------------------------------------------------------------------------------------------------------------------------------------------------------------------------------------------------------------------------------------------------------------------------------------------------------------------------------------------------------------------------------------------------------------------------------------------------------------------------------------------------------------------------------------------------------------------------------------------------------------------------------------------------|
|            | obesity is hardly a barrier to travel. In reality I guess that most often patient's goals are not dismissed but are simply not discussed (for many reasons).                                                                                                                                                                 |                                                                                                                                                                                                                                                                                               | <i>joint pain and is short of breath which limits her exercising capacity. Her children would love nothing more than their mother play with them. Unfortunately, she is not able to play soccer or jump on the trampoline because of the pain. The pain becomes too much for her and after long hesitation she discusses this with her physician. The only thing she wants is to play and interact with her children as painless as possible and therefore asks her physician to prescribe some medication. Her physician does not support medication, but instructs her to first strive for a healthy weight as a solution to relieve the pain. This is not aligned with the wishes of Mary who only wanted a short-term solution to be able to play with her children.</i> In the end, she leaves the consultation room with a referral to a dietitian and sport coach. |
| 35         | Page 24: was there nothing about systems preparedness? If so, please that this was not found.                                                                                                                                                                                                                                | It is an interesting remark to also include system preparedness, but the current literature did not point to that. We have reread the articles and went back to the raw data, but no information could be found on system preparedness. We have described this shortcoming in the discussion. | <b>(L635 – discussion) Besides patient and provider preparedness, it could seem logical that also the system has to be prepared, but the current literature do not point to that.</b>                                                                                                                                                                                                                                                                                                                                                                                                                                                                                                                                                                                                                                                                                     |
| Discussion |                                                                                                                                                                                                                                                                                                                              |                                                                                                                                                                                                                                                                                               |                                                                                                                                                                                                                                                                                                                                                                                                                                                                                                                                                                                                                                                                                                                                                                                                                                                                           |
| 36         | In the discussion I was expecting a juxtaposition of the goal oriented concept with related concepts in primary care, including generalism, holism, patient-centeredness, value based healthcare, shared decision making, patient participation, EBM (Sacket!) etc. How is it different? You could be more critical: is goal | This is an important remark as we did not elaborate on the related concepts. We also considered ourselves to juxtapose goal-oriented care to related concepts, but the method of concept analysis does not allow that.                                                                        | (L95 – introduction) The concept of goal-oriented care has been launched and mentioned for the first time in 1991 by Mold who proposed the concept as an alternative way of providing care [7]. Later on, in 2012, Reuben and Tinetti took the concept of goal-oriented care a step forward by stating that care “must above all                                                                                                                                                                                                                                                                                                                                                                                                                                                                                                                                          |

|  |                                                               |                                                                                                                                                                                                                                                                   |                                                                                                                                                                                                                                                                                                                                                                                                                                                                                                                                                                                                                                                                                                                                                                                                                                                                                                                                                                                                                                                                                                                                                                                                                                                                                                                                                                                                                                                                                                                                                                                        |
|--|---------------------------------------------------------------|-------------------------------------------------------------------------------------------------------------------------------------------------------------------------------------------------------------------------------------------------------------------|----------------------------------------------------------------------------------------------------------------------------------------------------------------------------------------------------------------------------------------------------------------------------------------------------------------------------------------------------------------------------------------------------------------------------------------------------------------------------------------------------------------------------------------------------------------------------------------------------------------------------------------------------------------------------------------------------------------------------------------------------------------------------------------------------------------------------------------------------------------------------------------------------------------------------------------------------------------------------------------------------------------------------------------------------------------------------------------------------------------------------------------------------------------------------------------------------------------------------------------------------------------------------------------------------------------------------------------------------------------------------------------------------------------------------------------------------------------------------------------------------------------------------------------------------------------------------------------|
|  | <p>oriented care actually a better concept and if so why?</p> | <p>Though, we value your comment and especially concerning EBM and Sackett is a very interesting point, thank you for this. We have been thinking about it and we have added more information about how goal-oriented care link with EBM in the introduction.</p> | <p>consider patients' preferred outcomes" [8]. The focus on setting goals based on the patients' needs and preferences rather than on health-related outcomes became one of the main novelties in chronic disease management [6]. <b><i>Not only could goal-oriented care be proposed as an important paradigm to overcome some of the new challenges for chronic patients [2], it might also corresponded to the original concept of evidence based medicine (EBM) [9]. EBM was first published by Sackett in 1996 who described three key components: 1. best external evidence, 2. individual clinical expertise, and 3. patients' values and expectations [9]. Since the first description of EBM, multiple approaches and paradigms has been developed to compromise between those three components [10]. For example, patient-centered care (PCC), which is already a well-known and widely used concept, is defined as "providing care that is respectful of, and responsive to individual patient preferences, needs, and values and ensuring that patients values guides all clinical decisions" [10]. Shared-decision making, on the other hand, also strives to share evidence and engage patients in care as it is "an approach where clinicians and patients share the best available evidence when faced with the task of making decisions, and where patients are supported to consider options, and to achieve informed preferences" [11]. Goal-oriented care is proposed as a promising healthcare paradigm and approach to operationalize EBM and return</i></b></p> |
|--|---------------------------------------------------------------|-------------------------------------------------------------------------------------------------------------------------------------------------------------------------------------------------------------------------------------------------------------------|----------------------------------------------------------------------------------------------------------------------------------------------------------------------------------------------------------------------------------------------------------------------------------------------------------------------------------------------------------------------------------------------------------------------------------------------------------------------------------------------------------------------------------------------------------------------------------------------------------------------------------------------------------------------------------------------------------------------------------------------------------------------------------------------------------------------------------------------------------------------------------------------------------------------------------------------------------------------------------------------------------------------------------------------------------------------------------------------------------------------------------------------------------------------------------------------------------------------------------------------------------------------------------------------------------------------------------------------------------------------------------------------------------------------------------------------------------------------------------------------------------------------------------------------------------------------------------------|



|  |  |  |                                                                                                                                                                                                                                                                                                                                                                                                                                                                                                                                                                                                                                                                                                                                                                                                                                                                                                                                                                                                                                                                                                                                                                                                                                                                                                                                                                                                                                                                                                                                            |
|--|--|--|--------------------------------------------------------------------------------------------------------------------------------------------------------------------------------------------------------------------------------------------------------------------------------------------------------------------------------------------------------------------------------------------------------------------------------------------------------------------------------------------------------------------------------------------------------------------------------------------------------------------------------------------------------------------------------------------------------------------------------------------------------------------------------------------------------------------------------------------------------------------------------------------------------------------------------------------------------------------------------------------------------------------------------------------------------------------------------------------------------------------------------------------------------------------------------------------------------------------------------------------------------------------------------------------------------------------------------------------------------------------------------------------------------------------------------------------------------------------------------------------------------------------------------------------|
|  |  |  | <p><i>to where it all started [8]. However, in contrast to the other approaches and paradigms, goal-oriented care is ill defined. Developing a common understanding on the concept could potentially contribute to the clarification and in-depth comparison between the related concepts and eventually lead to better use in clinical practice. However, some healthcare providers might already assume that they practice goal-oriented care spontaneously, but there still is a lack of underpinning knowledge and guidance on how to provide goal-oriented care to patients [4, 5]. As a first step in exploring the potential of goal-oriented care in chronic care, it is important to gain in-depth knowledge on what goal-oriented care is about and how it can be generally described.</i></p> <p>As goal-oriented care could be well-suited in primary care, as this context is often the linchpin for patients with chronic conditions, this will be the focus of this study [12]. This study aimed to describe a structured approach to deepen the concept of goal-oriented care for patients with chronic conditions or multimorbidity in the primary care context.</p> <p>(702 – strengths, limitations, and recommendations) This workflow should include the skills and tools so patients and providers can find a common ground in the goals and are supported in implementing goal-oriented care in practice. <b><i>Then, when goal-oriented care is a well understood concept it is possible to perform an</i></b></p> |
|--|--|--|--------------------------------------------------------------------------------------------------------------------------------------------------------------------------------------------------------------------------------------------------------------------------------------------------------------------------------------------------------------------------------------------------------------------------------------------------------------------------------------------------------------------------------------------------------------------------------------------------------------------------------------------------------------------------------------------------------------------------------------------------------------------------------------------------------------------------------------------------------------------------------------------------------------------------------------------------------------------------------------------------------------------------------------------------------------------------------------------------------------------------------------------------------------------------------------------------------------------------------------------------------------------------------------------------------------------------------------------------------------------------------------------------------------------------------------------------------------------------------------------------------------------------------------------|

|    |                                                                                                                                                                                                                                            |                                                                                                                                                                                                                                                                                                                                                                                                                                                                                                                                                                                                                                                                                                                                                                                                                                                                                                                                                                                                                                                                                                                                                                                                                                                                                                       |                                                                                                                                                                                                                                                                                                                                                                                                                                                                                                                                                                                                                                                                                                                                                                                                                                                                                                                                                                                                                                                                                                                                                                                                                                                                                                                                                                          |
|----|--------------------------------------------------------------------------------------------------------------------------------------------------------------------------------------------------------------------------------------------|-------------------------------------------------------------------------------------------------------------------------------------------------------------------------------------------------------------------------------------------------------------------------------------------------------------------------------------------------------------------------------------------------------------------------------------------------------------------------------------------------------------------------------------------------------------------------------------------------------------------------------------------------------------------------------------------------------------------------------------------------------------------------------------------------------------------------------------------------------------------------------------------------------------------------------------------------------------------------------------------------------------------------------------------------------------------------------------------------------------------------------------------------------------------------------------------------------------------------------------------------------------------------------------------------------|--------------------------------------------------------------------------------------------------------------------------------------------------------------------------------------------------------------------------------------------------------------------------------------------------------------------------------------------------------------------------------------------------------------------------------------------------------------------------------------------------------------------------------------------------------------------------------------------------------------------------------------------------------------------------------------------------------------------------------------------------------------------------------------------------------------------------------------------------------------------------------------------------------------------------------------------------------------------------------------------------------------------------------------------------------------------------------------------------------------------------------------------------------------------------------------------------------------------------------------------------------------------------------------------------------------------------------------------------------------------------|
|    |                                                                                                                                                                                                                                            |                                                                                                                                                                                                                                                                                                                                                                                                                                                                                                                                                                                                                                                                                                                                                                                                                                                                                                                                                                                                                                                                                                                                                                                                                                                                                                       | <p><i>in-depth comparison between related concepts (e.g. patient-centered care).</i></p>                                                                                                                                                                                                                                                                                                                                                                                                                                                                                                                                                                                                                                                                                                                                                                                                                                                                                                                                                                                                                                                                                                                                                                                                                                                                                 |
| 37 | <p>Perhaps also provide a discussion on tensions with contrasting (1) frameworks and (3) systems such as transnationalism, (4) care standards, P4P, neoliberal economics and budgeting (tension of providing efficient care for many).</p> | <p>It is a very interesting take to discuss (1) the tension with contrasting frameworks, but in this study we solely focused on an objective description of the information that was provided in the current literature. Little more attention on the link with the (2) care standards is provided in the introduction and discussion.</p> <p>The absence of this juxtaposition with other frameworks is added in the discussion section as recommendation for further research. To discuss a bit more on (3) contrasting systems, a cross-comparison study has been published after submitting this study. In this study, three international cases has adopted goal-oriented care and were linked it to integrated care. They found that goal-oriented could enable integrated care. It can be suggested that goal-oriented care has the potential to transit over specific health system and integrate them to each other [21].</p> <p>We also value your comment to elaborate more on the (4) economic aspects of goal-oriented care. However, to investigate potential economic effects for goal-oriented care, further research is necessary. At this moment there is a discussion in the field about how to evaluate goal-oriented care. We have addressed this in the discussion section.</p> | <p><b><i>(L181 – method: select the literature) Related concepts such as patient-centered care, value-based care, etc. were not included as the method of concept analysis prescribes to deepen all the attributes of one concept.</i></b></p> <p>(L207 – method: step 3) Exclusion criteria: (a) focusing on single-disease management, (b) goals regarding disease-specific outcomes (e.g. cancer or diabetes), (c) focusing on goal-oriented care in a specific context (e.g. rehabilitation center), <b><i>and (d) specifically mentioning patient-centered care, shared-decision making, etc. as they will hamper the understanding of specifically goal-oriented care.</i></b></p> <p>(L95 – introduction) The concept of goal-oriented care has been launched and mentioned for the first time in 1991 by Mold who proposed the concept as an alternative way of providing care [7]. Later on, in 2012, Reuben and Tinetti took the concept of goal-oriented care a step forward by stating that care “must above all consider patients’ preferred outcomes” [8]. The focus on setting goals based on the patients’ needs and preferences rather than on health-related outcomes became one of the main novelties in chronic disease management [6]. <b><i>Not only could goal-oriented care be proposed as an important paradigm to overcome some of</i></b></p> |

|  |  |  |                                                                                                                                                                                                                                                                                                                                                                                                                                                                                                                                                                                                                                                                                                                                                                                                                                                                                                                                                                                                                                                                                                                                                                                                                                                                                                                                                                                                                                                                                                                                                                                |
|--|--|--|--------------------------------------------------------------------------------------------------------------------------------------------------------------------------------------------------------------------------------------------------------------------------------------------------------------------------------------------------------------------------------------------------------------------------------------------------------------------------------------------------------------------------------------------------------------------------------------------------------------------------------------------------------------------------------------------------------------------------------------------------------------------------------------------------------------------------------------------------------------------------------------------------------------------------------------------------------------------------------------------------------------------------------------------------------------------------------------------------------------------------------------------------------------------------------------------------------------------------------------------------------------------------------------------------------------------------------------------------------------------------------------------------------------------------------------------------------------------------------------------------------------------------------------------------------------------------------|
|  |  |  | <p><i>the new challenges for chronic patients [2], it might also corresponded to the original concept of evidence based medicine (EBM) [9]. EBM was first published by Sackett in 1996 who described three key components: 1. best external evidence, 2. individual clinical expertise, and 3. patients' values and expectations [9]. Since the first description of EBM, multiple approaches and paradigms has been developed to compromise between those three components [10]. For example, patient-centered care (PCC), which is already a well-known and widely used concept, is defined as "providing care that is respectful of, and responsive to individual patient preferences, needs, and values and ensuring that patients values guides all clinical decisions" [10]. Shared-decision making, on the other hand, also strives to share evidence and engage patients in care as it is "an approach where clinicians and patients share the best available evidence when faced with the task of making decisions, and where patients are supported to consider options, and to achieve informed preferences" [11]. Goal-oriented care is proposed as a promising healthcare paradigm and approach to operationalize EBM and return to where it all started [8]. However, in contrast to the other approaches and paradigms, goal-oriented care is ill defined. Developing a common understanding on the concept could potentially contribute to the clarification and in-depth comparison between the related concepts and eventually lead to better use in</i></p> |
|--|--|--|--------------------------------------------------------------------------------------------------------------------------------------------------------------------------------------------------------------------------------------------------------------------------------------------------------------------------------------------------------------------------------------------------------------------------------------------------------------------------------------------------------------------------------------------------------------------------------------------------------------------------------------------------------------------------------------------------------------------------------------------------------------------------------------------------------------------------------------------------------------------------------------------------------------------------------------------------------------------------------------------------------------------------------------------------------------------------------------------------------------------------------------------------------------------------------------------------------------------------------------------------------------------------------------------------------------------------------------------------------------------------------------------------------------------------------------------------------------------------------------------------------------------------------------------------------------------------------|

|    |                                                                                                                                                                                         |                                                                                                                                                                                                                                     |                                                                                                                                                                                                                                                                                                                                                                                                                                                                                                                                                                                                                                                                                                                                                                                                                                                                                                                                                                                                                                                                                                                                                                                                                                                       |
|----|-----------------------------------------------------------------------------------------------------------------------------------------------------------------------------------------|-------------------------------------------------------------------------------------------------------------------------------------------------------------------------------------------------------------------------------------|-------------------------------------------------------------------------------------------------------------------------------------------------------------------------------------------------------------------------------------------------------------------------------------------------------------------------------------------------------------------------------------------------------------------------------------------------------------------------------------------------------------------------------------------------------------------------------------------------------------------------------------------------------------------------------------------------------------------------------------------------------------------------------------------------------------------------------------------------------------------------------------------------------------------------------------------------------------------------------------------------------------------------------------------------------------------------------------------------------------------------------------------------------------------------------------------------------------------------------------------------------|
|    |                                                                                                                                                                                         |                                                                                                                                                                                                                                     | <p><b>clinical practice. However,</b> some healthcare providers might already assume that they practice goal-oriented care spontaneously, but there still is a lack of underpinning knowledge and guidance on how to provide goal-oriented care to patients [4, 5]. As a first step in exploring the potential of goal-oriented care in chronic care, it is important to gain in-depth knowledge on what goal-oriented care is about and how it can be generally described.</p> <p>As goal-oriented care could be well-suited in primary care, as this context is often the linchpin for patients with chronic conditions, this will be the focus of this study [12]. This study aimed to describe a structured approach to deepen the concept of goal-oriented care for patients with chronic conditions or multimorbidity in the primary care context.</p> <p>(L702 – discussion) This workflow should include the skills and tools so patients and providers can find a common ground in the goals and are supported in implementing goal-oriented care in practice. <b>Then, when goal-oriented care is a well understood concept it is possible to perform an in-depth comparison between related concepts (e.g. patient-centered care).</b></p> |
| 38 | I would also like to see what was missing in the literature / what was not mentioned? E.g. as I mentioned above: system preparedness (as opposed to patient and provider preparedness). | Indeed, there remain some knowledge gaps after analyzing the current literature. The literature learned us that goal-oriented is a stepwise approach, but it is still unclear how this theory should be translated into a practical | <b>(L 635 – discussion) Besides patient and provider preparedness, it could seem logical that also the system has to be prepared, but the current literature do not point to that.</b>                                                                                                                                                                                                                                                                                                                                                                                                                                                                                                                                                                                                                                                                                                                                                                                                                                                                                                                                                                                                                                                                |

|  |                       |                                                                                                                                                                                                                                                                                                                                                                                                                                                                                                                                                                                                          |                                                                                                                                                                                                                                                                                                                                                                                                                                                                                                                                                                                                                                                                                                                                                                                 |
|--|-----------------------|----------------------------------------------------------------------------------------------------------------------------------------------------------------------------------------------------------------------------------------------------------------------------------------------------------------------------------------------------------------------------------------------------------------------------------------------------------------------------------------------------------------------------------------------------------------------------------------------------------|---------------------------------------------------------------------------------------------------------------------------------------------------------------------------------------------------------------------------------------------------------------------------------------------------------------------------------------------------------------------------------------------------------------------------------------------------------------------------------------------------------------------------------------------------------------------------------------------------------------------------------------------------------------------------------------------------------------------------------------------------------------------------------|
|  | <p>Anything else?</p> | <p>approach including the organization of patient preparedness and interprofessional collaboration. Besides the lack of a practical workflow, there is also a lack on how to develop process indicators to eventually evaluate a goal-oriented care practice. Also, to meet the previous comment of juxtaposing goal-oriented care with other frameworks and systems, more research will be needed as the current literature could not provide this answer. To conclude that this concept analysis is first main step to facilitate further research on divers topics related to goal-oriented care.</p> | <p><b><i>(L683 – strengths, limitations, and recommendations) One of the knowledge gaps revealed in this concept analysis is the lack of knowledge on what patients’ goals are set, how goal-oriented care is delivered, and how it is best put into practice in both one-on-one interactions between patients and providers and in interprofessional collaboration. Regarding patients it is important to gain more insight in how they are preferably prepared for discussing their personal goals.</i></b></p> <p><b><i>(L700 – strengths, limitations, and recommendations) However, further research is needed to translate the current knowledge on the concept of goal-oriented care into a tangible workflow process of care that entails the three stages.</i></b></p> |
|--|-----------------------|----------------------------------------------------------------------------------------------------------------------------------------------------------------------------------------------------------------------------------------------------------------------------------------------------------------------------------------------------------------------------------------------------------------------------------------------------------------------------------------------------------------------------------------------------------------------------------------------------------|---------------------------------------------------------------------------------------------------------------------------------------------------------------------------------------------------------------------------------------------------------------------------------------------------------------------------------------------------------------------------------------------------------------------------------------------------------------------------------------------------------------------------------------------------------------------------------------------------------------------------------------------------------------------------------------------------------------------------------------------------------------------------------|

| Comments of reviewer 4 |                                                                                                                                                                                                                                                                                                                                                                                                                                             | Response                                                                                                                                                                                                                                                                                                                                                                                                                                          | Changes in the manuscript                                                                                                                                                                                                                                                                                                                                                                                                                                                                                                                                                                                                                                                                                                                                                                                                                                                                                                                                                                                              |
|------------------------|---------------------------------------------------------------------------------------------------------------------------------------------------------------------------------------------------------------------------------------------------------------------------------------------------------------------------------------------------------------------------------------------------------------------------------------------|---------------------------------------------------------------------------------------------------------------------------------------------------------------------------------------------------------------------------------------------------------------------------------------------------------------------------------------------------------------------------------------------------------------------------------------------------|------------------------------------------------------------------------------------------------------------------------------------------------------------------------------------------------------------------------------------------------------------------------------------------------------------------------------------------------------------------------------------------------------------------------------------------------------------------------------------------------------------------------------------------------------------------------------------------------------------------------------------------------------------------------------------------------------------------------------------------------------------------------------------------------------------------------------------------------------------------------------------------------------------------------------------------------------------------------------------------------------------------------|
| Results                |                                                                                                                                                                                                                                                                                                                                                                                                                                             |                                                                                                                                                                                                                                                                                                                                                                                                                                                   |                                                                                                                                                                                                                                                                                                                                                                                                                                                                                                                                                                                                                                                                                                                                                                                                                                                                                                                                                                                                                        |
| 39                     | This case (Mary) feels a bit tenuous - it feels unlikely a family doctor would not 'allow' travel plans on reasonable grounds. I understand what you are trying to illustrate - but a better example is needed.                                                                                                                                                                                                                             | Thank you for this remark. Also reviewer 1, 2, and 3 (24,32) made this comment. A more realistic example (checked with GP) is described.                                                                                                                                                                                                                                                                                                          | Mary is a 40-year old mother of two young children and dealing with obesity since her childhood. <b><i>Due to her weight, she has a lot of joints pain and is short of breath which limits her exercising capacity. Her children would love nothing more than their mother play with them. Unfortunately, she is not able to play soccer or jump on the trampoline because of the pain. The pain becomes too much for her and after long hesitation she discusses this with her physician. The only thing she wants is to play and interact with her children as painless as possible and therefore asks her physician to prescribe some medication. Her physician does not support medication, but instructs her to first strive for a healthy weight as a solution to relieve the pain. This is not aligned with the wishes of Mary who only wanted a short-term solution to be able to play with her children.</i></b> In the end, she leaves the consultation room with a referral to a dietitian and sport coach. |
| 40                     | (L220) This is a really important point, and the likely reason for resistance by providers. to goal-oriented care. It feels like it would be of value to expand on this further if possible. Did the literature explore this in further depth - what role does the provider have in shifting patients' goals and how should they do this, what are the ethics behind trying to do so, how is this best done in a way that does not alienate | We are aware that we have not further discussed this point. It is indeed really important to explore this more in depth, because we believe that we first have to answer these questions before we can fully implement goal-oriented care in practice. The current literature could not provide us an answer on this. This comment is also about how we can translate the patients' (life) goals to the providers' (medical) goals and eventually | (L699 – strengths, limitations, and recommendations) Goal-oriented care shows the potential to be a way forward for patients with chronic conditions and multimorbidity. However, further research is needed to translate the current knowledge on the concept of goal-oriented care into a tangible workflow process of care that entails the three stages. <b><i>This workflow should include the skills and tools so patients and providers can find a common</i></b>                                                                                                                                                                                                                                                                                                                                                                                                                                                                                                                                               |

|            |                                                                                                                                                                                                  |                                                                                                                                                                                                                                                                                                                                                                                                                                                                                                       |                                                                                                                                                                                                                                                                                                                                                                                                                                                                                                                                                                                        |
|------------|--------------------------------------------------------------------------------------------------------------------------------------------------------------------------------------------------|-------------------------------------------------------------------------------------------------------------------------------------------------------------------------------------------------------------------------------------------------------------------------------------------------------------------------------------------------------------------------------------------------------------------------------------------------------------------------------------------------------|----------------------------------------------------------------------------------------------------------------------------------------------------------------------------------------------------------------------------------------------------------------------------------------------------------------------------------------------------------------------------------------------------------------------------------------------------------------------------------------------------------------------------------------------------------------------------------------|
|            | the patient?                                                                                                                                                                                     | <p>develop a workflow for goal-oriented care. Unfortunately, this concept analysis could not provide us with the needed information to answer these questions and provided an objective description of what we found in literature.</p> <p>We thank you for this comment, you really touched very important points regarding goal-oriented care and these topics will be subject to further research. We have added this ideas in the discussion section as recommendations for further research.</p> | <b><i>ground in the goals and are supported in implementing goal-oriented care in practice.</i></b>                                                                                                                                                                                                                                                                                                                                                                                                                                                                                    |
| 41         | The term 'empirical referent' is hard to understand, although I can see you have described it - in order to bring it to life I wonder if the table with the examples could provide more details. | The term empirical referent is indeed complex to understand, but we have chosen to stick to the prescribed steps of Walker and Avant and their naming. To clarify this a bit more, the purpose of each tool or measurement and for who it can be used has been added in the overview.                                                                                                                                                                                                                 | Adjustments have been made to Table 4 with more details about the purpose of each tool, measurement.                                                                                                                                                                                                                                                                                                                                                                                                                                                                                   |
| Discussion |                                                                                                                                                                                                  |                                                                                                                                                                                                                                                                                                                                                                                                                                                                                                       |                                                                                                                                                                                                                                                                                                                                                                                                                                                                                                                                                                                        |
| 42         | I wondered if a bit more discussion is needed about the risks of when patient and providers goals do not align, and approaches needed to align these.                                            | It is interesting to deepen potential risks in case that patient and provider goals do not align. At this moment, the literature does not address this risk and could therefore be further explored. What we do know is that, in case that those goals do not align, it could cause conflicts between patients and providers. We described those potential conflicts and strategies to overcome them in the discussion part.                                                                          | <b><i>(L591 – discussion) Not only is there ambiguity on what goals patients set, it is also not clear how goals are being set. What is clear is that patients and providers must collaborate and negotiate on which goals are important. Nevertheless, this can still cause conflicts between the patients’ goals and providers’ goals [22, 23]. To overcome these conflicts, it is suggested to first set the patients’ goals and then discuss about the medical goals, because conflicts are more likely when goals are placed on the same level [24]. It should however be</i></b> |

|    |                                                                                                                                                                    |                                                                                                                                                                                                                                                                                                                |                                                                                                                                                                                                                                                                                                                                                                                                                                                                                                                                                                                                                                                                                                                                                                                                                                     |
|----|--------------------------------------------------------------------------------------------------------------------------------------------------------------------|----------------------------------------------------------------------------------------------------------------------------------------------------------------------------------------------------------------------------------------------------------------------------------------------------------------|-------------------------------------------------------------------------------------------------------------------------------------------------------------------------------------------------------------------------------------------------------------------------------------------------------------------------------------------------------------------------------------------------------------------------------------------------------------------------------------------------------------------------------------------------------------------------------------------------------------------------------------------------------------------------------------------------------------------------------------------------------------------------------------------------------------------------------------|
|    |                                                                                                                                                                    |                                                                                                                                                                                                                                                                                                                | <p><i>noted that setting the patients' goals on top does not legitimate full patients' responsibility over the care plan [24]. Another way to overcome these conflicts is to work with a facilitator as Naik et al. did in developing their patients priorities identification process. These facilitators supported patients in setting goals, choosing the most important goals to eventually communicate them with the provider [6]. Yet another strategy is to use tools to assess patient treatment priorities and preferences.</i> Unfortunately, Mangin et al. found few relevant tools to set patients' goals [19]. They argue for the need to develop specific strategies to make patient priorities visible in the clinical record and medical-decision making [19].</p>                                                  |
| 43 | <p>(L253) What if any, guidance is there for providers to work out how to align patient needs and preference with those of their health and the health system.</p> | <p>It is an interesting question as this will be one of the main challenges to eventually implement goal-oriented care in practice. In literature that is not clearly described, but some strategies have been proposed. These strategies have been added in the discussion (cfr. answer previous comment)</p> | <p><b><i>(L591 – discussion) Not only is there ambiguity on what goals patients set, it is also not clear how goals are being set. What is clear is that patients and providers must collaborate and negotiate on which goals are important. Nevertheless, this can still cause conflicts between the patients' goals and providers' goals [22, 23]. To overcome these conflicts, it is suggested to first set the patients' goals and then discuss about the medical goals, because conflicts are more likely when goals are placed on the same level [24]. It should however be noted that setting the patients' goals on top does not legitimate full patients' responsibility over the care plan [24]. Another way to overcome these conflicts is to work with a facilitator as Naik et al. did in developing their</i></b></p> |



|    |                                                                                                                                                                |                                                                                                          |                                                                                                                                                                                                                                                                                                                                                                                                                                                                                                                                                                                                                                                                                                                                                                                                                                                                                                                                                                                                                                                        |
|----|----------------------------------------------------------------------------------------------------------------------------------------------------------------|----------------------------------------------------------------------------------------------------------|--------------------------------------------------------------------------------------------------------------------------------------------------------------------------------------------------------------------------------------------------------------------------------------------------------------------------------------------------------------------------------------------------------------------------------------------------------------------------------------------------------------------------------------------------------------------------------------------------------------------------------------------------------------------------------------------------------------------------------------------------------------------------------------------------------------------------------------------------------------------------------------------------------------------------------------------------------------------------------------------------------------------------------------------------------|
|    |                                                                                                                                                                |                                                                                                          | <p><i>patients priorities identification process. These facilitators supported patients in setting goals, choosing the most important goals to eventually communicate them with the provider [6]. Yet another strategy is to use tools to assess patient treatment priorities and preferences.</i> Unfortunately, Mangin et al. found few relevant tools to set patients' goals [19]. They argue for the need to develop specific strategies to make patient priorities visible in the clinical record and medical-decision making [19].</p> <p>Goal-oriented care shows the potential to be a way forward for patients with chronic conditions and multimorbidity. However, further research is needed to translate the current knowledge on the concept of goal-oriented care into a tangible workflow process of care that entails the three stages. <i>This workflow should include the skills and tools so patients and providers can find a common ground in the goals and are supported in implementing goal-oriented care in practice.</i></p> |
| 44 | (L323) This sentence is a broad generalization. Could it be that sometime or often this happens... not always.                                                 | The sentence is written more 'carefully'.                                                                | Currently patients <i>are not always stimulated</i> to think about their care.                                                                                                                                                                                                                                                                                                                                                                                                                                                                                                                                                                                                                                                                                                                                                                                                                                                                                                                                                                         |
| 45 | (L327) This is a broad generalization, I think there are GPs who are aware of these. Again could the word often or sometimes be used to moderate the sentence? | As the previous comment, the word 'often' is added.                                                      | Voigt et al. observed that GPs <i>are often unaware</i> of patients' priorities in daily life, which were in contrast with their perceived importance of patient's medical goals                                                                                                                                                                                                                                                                                                                                                                                                                                                                                                                                                                                                                                                                                                                                                                                                                                                                       |
| 46 | (337) This sentence seems to contradict the next one (limited studies, and then is says mostly positive outcomes).                                             | The positive outcomes were related to the results of the founded studies. This has been made more clear. | (L638 – discussion) In terms of the consequences of goal-oriented care, <i>a limited number of studies have been able to demonstrate outcomes of goal-oriented care.</i>                                                                                                                                                                                                                                                                                                                                                                                                                                                                                                                                                                                                                                                                                                                                                                                                                                                                               |

|    |                                                                                                                                                                         |                                                                                   |                                                                                                                                                      |
|----|-------------------------------------------------------------------------------------------------------------------------------------------------------------------------|-----------------------------------------------------------------------------------|------------------------------------------------------------------------------------------------------------------------------------------------------|
|    |                                                                                                                                                                         |                                                                                   | <b>Nonetheless, these studies showed mostly positive outcomes towards the patients, providers, health system, and overall population well-being.</b> |
| 47 | Supporting files: These supplementary documents are helpful and interesting- can you make reference to them in the main text so the reader knows when to refer to them. | We have checked the references to the supporting files and added if we needed to. | (L262 – results) goal-oriented care ( <b>S1 Table 1</b> ) (L 439 – antecedents) in each training ( <b>S2 Table 2</b> ).                              |

1. Levac D, Colquhoun H, O'Brien KK. Scoping studies: advancing the methodology. *Implement Sci.* 2010;5:69. Epub 2010/09/22. doi: 10.1186/1748-5908-5-69. PubMed PMID: 20854677; PubMed Central PMCID: PMCPMC2954944.
2. Kuluski K, Peckham A, Gill A, Gagnon D, Wong-Cornall C, McKillop A, et al. What is Important to Older People with Multimorbidity and Their Caregivers? Identifying Attributes of Person Centered Care from the User Perspective. *Int J Integr Care.* 2019;19(3):4. Epub 2019/08/02. doi: 10.5334/ijic.4655. PubMed PMID: 31367203; PubMed Central PMCID: PMCPMC6659759.
3. Kuipers SJ, Cramm JM, Nieboer AP. The importance of patient-centered care and co-creation of care for satisfaction with care and physical and social well-being of patients with multi-morbidity in the primary care setting. *BMC Health Serv Res.* 2019;19(1):1-9.
4. Vermunt N, Harmsen M, Westert GP, Olde Rikkert MGM, Faber MJ. Collaborative goal setting with elderly patients with chronic disease or multimorbidity: a systematic review. *BMC Geriatr.* 2017;17(1):167. Epub 2017/08/02. doi: 10.1186/s12877-017-0534-0. PubMed PMID: 28760149; PubMed Central PMCID: PMCPMC5537926.
5. Poitras ME, Maltais ME, Bestard-Denomme L, Stewart M, Fortin M. What are the effective elements in patient-centered and multimorbidity care? A scoping review. *BMC Health Serv Res.* 2018;18(1):446. Epub 2018/06/15. doi: 10.1186/s12913-018-3213-8. PubMed PMID: 29898713; PubMed Central PMCID: PMCPMC6001147.
6. Naik AD, Dindo LN, Van Liew JR, Hundt NE, Vo L, Hern, et al. Development of a Clinically Feasible Process for Identifying Individual Health Priorities. *Journal of the American Geriatrics Society.* 2018;66(10):1872-9. PubMed PMID: rayyan-47069467.
7. Mold JW, Blake GH, Becker LA. Goal-oriented medical care. *Family medicine.* 1991;23(1):46-51. Epub 1991/01/01. PubMed PMID: 2001782.
8. Reuben DB, Tinetti ME. Goal-oriented patient care--an alternative health outcomes paradigm. *The New England journal of medicine.* 2012;366(9):777-9. Epub 2012/03/02. doi: 10.1056/NEJMp1113631. PubMed PMID: 22375966.
9. Sackett DL, Rosenberg WM, Gray JM, Haynes RB, Richardson WS. Evidence based medicine: what it is and what it isn't. *British Medical Journal Publishing Group;* 1996.
10. Baker A. Crossing the quality chasm: a new health system for the 21st century: *British Medical Journal Publishing Group;* 2001.
11. Elwyn G, Frosch D, Thomson R, Joseph-Williams N, Lloyd A, Kinnersley P, et al. Shared decision making: a model for clinical practice. *Journal of general internal medicine.* 2012;27(10):1361-7.

12. Hobbs FR, Bankhead C, Mukhtar T, Stevens S, Perera-Salazar R, Holt T, et al. Clinical workload in UK primary care: a retrospective analysis of 100 million consultations in England, 2007–14. *The Lancet*. 2016;387(10035):2323-30.
13. Mold. Goal-directed health care: redefining health and health care in the era of value-based care. *Cureus* 2017;9(2).
14. Berntsen G, Hoyem A, Lettrem I, Ruland C, Rumpsfeld M, Gammon D. A person-centered integrated care quality framework, based on a qualitative study of patients' evaluation of care in light of chronic care ideals. *BMC Health Serv Res*. 2018;18(1):479. Epub 2018/06/22. doi: 10.1186/s12913-018-3246-z. PubMed PMID: 29925357; PubMed Central PMCID: PMC6011266.
15. Salter C, Shiner A, Lenaghan E, Murdoch J, Ford JA, Winterburn S, et al. Setting goals with patients living with multimorbidity: qualitative analysis of general practice consultations. *Br J Gen Pract*. 2019;69(684):e479-e88. Epub 2019/06/05. doi: 10.3399/bjgp19X704129. PubMed PMID: 31160370; PubMed Central PMCID: PMC6592350.
16. Kessler D, Walker I, Sauve-Schenk K, Egan M. Goal setting dynamics that facilitate or impede a client-centered approach. *Scandinavian journal of occupational therapy*. 2018;26(5):315-24. PubMed PMID: 29671662.
17. Tinetti ME, Esterson J, Ferris R, Posner P, Blaum CS. Patient Priority-Directed Decision Making and Care for Older Adults with Multiple Chronic Conditions. *Clinics in geriatric medicine*. 2016;32(2):261-75. PubMed PMID: 27113145.
18. Murdoch J, Salter C, Ford J, Lenaghan E, Shiner A, Steel N. The "unknown territory" of goal-setting: Negotiating a novel interactional activity within primary care doctor-patient consultations for patients with multiple chronic conditions. *Soc Sci Med*. 2020;256:113040. Epub 2020/05/31. doi: 10.1016/j.socscimed.2020.113040. PubMed PMID: 32473530; PubMed Central PMCID: PMC7306159.
19. Mangin D, Stephen G, Bismah V, Risdon C. Making patient values visible in healthcare: a systematic review of tools to assess patient treatment priorities and preferences in the context of multimorbidity. *BMJ open*. 2016;6(6):e010903.
20. Kuluski K, Guilcher SJT. Toward a Person-Centred Learning Health System: Understanding Value from the Perspectives of Patients and Caregivers. *HealthcarePapers*. 2019;18(4):36-46. Epub 2020/01/05. doi: 10.12927/hcpap.2019.26030. PubMed PMID: 31901067.
21. Steele Gray C, Grudniewicz A, Armas A, Mold J, Im J, Boeckxstaens P. Goal-Oriented Care: A Catalyst for Person-Centred System Integration. *Int J Integr Care*. 2020;20(4):8. Epub 2020/11/18. doi: 10.5334/ijic.5520. PubMed PMID: 33199976; PubMed Central PMCID: PMC7646288.
22. Bayliss EA, Bonds DE, Boyd CM, Davis MM, Finke B, Fox MH, et al. Understanding the context of health for persons with multiple chronic conditions: moving from what is the matter to what matters. *Annals of family medicine*. 2014;12(3):260-9. Epub 2014/05/14. doi: 10.1370/afm.1643. PubMed PMID: 24821898; PubMed Central PMCID: PMC4018375.
23. Fried TR, Tinetti M, Agostini J, Iannone L, Towle V. Health outcome prioritization to elicit preferences of older persons with multiple health conditions. *Patient education and counseling*. 2011;83(2):278-82.
24. Berntsen GK, Gammon D, Steinsbekk A, Salamonsen A, Foss N, Ruland C, et al. How do we deal with multiple goals for care within an individual patient trajectory? A document content analysis of health service research papers on goals for care. *BMJ open*. 2015;5(12):e009403. Epub 2015/12/15. doi: 10.1136/bmjopen-2015-009403. PubMed PMID: 26656243; PubMed Central PMCID: PMC4679896.
